## RESEARCH ARTICLE

# Evidence for Earlier Stone Age 'coastal use': The site of Dungo IV, Benguela Province, Angola

Isis Mesfin<sup>1,2,3\*</sup>, Maria-Helena Benjamim<sup>1</sup>, Anne-Elisabeth Lebatard<sup>4</sup>, Thibaud Saos<sup>2†</sup>, David Pleurdeau<sup>2†</sup>, Jorge Matos<sup>5†</sup>, Matt Lotter<sup>3</sup>

**1** Fyssen Foundation - Museu Nacional de Arqueologia de Benguela, Benguela, Angola, **2** UMR 7194 Histoire Naturelle de l'Homme Préhistorique – CNRS, Muséum National d'Histoire Naturelle, Université Perpignan Via Domitia – Alliance Sorbonne Université, Paris, France, **3** Palaeo-Research Institute, University of Johannesburg, Johannesburg, South Africa, **4** Aix-Marseille, CNRS, IRD, INRAE, CEREGE, Aix-en-Provence, France, **5** Instituto Superior Politecnico Jean Piaget, Bairro Nossa Senhora da Graça, Benguela, Angola

☉ These authors contributed equally to this work.

† TS, DP and JM also contributed equally to this work.

\* [isis.mesfin@edu.mnhn.fr](mailto:isis.mesfin@edu.mnhn.fr), [isis.mesfin@gmail.com](mailto:isis.mesfin@gmail.com)

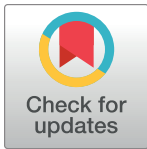

## OPEN ACCESS

**Citation:** Mesfin I, Benjamim M-H, Lebatard A-E, Saos T, Pleurdeau D, Matos J, et al. (2023) Evidence for Earlier Stone Age 'coastal use': The site of Dungo IV, Benguela Province, Angola. *PLoS ONE* 18(2): e0278775. <https://doi.org/10.1371/journal.pone.0278775>

**Editor:** Michael D. Petraglia, Griffith University, AUSTRALIA

**Received:** August 26, 2022

**Accepted:** November 22, 2022

**Published:** February 24, 2023

**Copyright:** © 2023 Mesfin et al. This is an open access article distributed under the terms of the [Creative Commons Attribution License](https://creativecommons.org/licenses/by/4.0/), which permits unrestricted use, distribution, and reproduction in any medium, provided the original author and source are credited.

**Data Availability Statement:** All relevant data are within the article and its [Supporting information files](#).

**Funding:** I.M. received financial support from the French Institute of South Africa - Research, the National Geographic Society - Earlier Career Grant, the French Embassy of Angola, the Ecole Doctorale 227 of the Muséum National d'Histoire Naturelle, the Académie Française - Walter Zeldidja, the Association Emilie Campmas, the Association des Femmes Françaises Diplômées des Universités.

## Abstract

The relationship between Earlier Stone Age (ESA) hominins and the southern African coastal environment has been poorly investigated, despite the high concentration of open-air sites in marine and fluvial terraces of the coastal plain from c. 1Ma onward during the Mid-Pleistocene Transition. Southern Africa provides some of the earliest evidence of coastal subsistence strategies since the end of the Middle Pleistocene, during the Middle Stone Age (MSA). These coastal MSA sites showcase the role of coastal environments in the emergence and development of modern human behaviors. Given the high prevalence of coastal ESA sites throughout the region, we seek to question the relationship between hominins and coastal landscapes much earlier in time. In this regard, the +100 m raised beaches of the Benguela Province, Angola, are key areas as they are well-preserved and contain a dense record of prehistoric occupation from the beginning of the Middle Pleistocene, including sites like Dungo, Mormolo, Sombreiro, Macaca and Punta das Vacas. Accordingly, this paper provides a critical review of the coastal ESA record of southern Africa and a detailed presentation of the Dungo IV site, through a qualitative technological analysis coupled with a quantitative inter-site comparison with contemporary southern African coastal plain sites. Through our detailed technological analyses, we highlight the influence of coastal lithological resources on the technical behaviors of hominin groups, and we propose the existence of a “regional adaptive strategy” in a coastal landscape more than 600 000 years ago. Finally, we argue for the integration of coastal landscapes into hominins’ territories, suggesting that adaptation to coastal environments is actually a slower process which begins with “territorialization” well before the emergence and development of *Homo sapiens*.

The funders had no role in study design, data collection and analysis, decision to publish, or preparation of the manuscript.

**Competing interests:** The authors have declared that no competing interests exist.

## Introduction

The southern African coast starts in the Democratic Republic of Congo and extends southwards all the way down to the Cape of Good Hope and northwards back up to Tanzania. An important topographic feature of this coastline is a plain which extends along its western and southern parts, called the southern African coastal plain. It extends from the shoreline to the foot of the Great Escarpment in the south and continues towards the north where it delimits the Angolan Plateau. The plain is currently shared between Angola, Namibia and South Africa, and is characterized, north to south, by the Zambezi woodland down to Lobito (Angola), the Karroo-Namib arid to semi-arid environment from Lobito all along the Namibian coast, and then the *fynbos* environment which begins in the Cape Province of South Africa [1]. Coastal archaeology is well-developed across this area, but especially in South Africa where there is a rich corpus of coastal sites that document past lifeways and early symbolic behaviors of Pleistocene coastal hunter-gatherers [2–17], and also in Namibia—especially during the Holocene [18]. However, there are gaps in our knowledge pertaining to specific areas and time periods across this plain, and it is unclear whether the adaptive strategies implemented by early humans represent a collective response that facilitated strategic local landscape and resource use.

With this paper, we first provide a review of the available data on human dispersals along the southern African coast, specifically during the Earlier Stone Age (ESA) that reflects the earliest phase of human/coastal interactions. This is followed by a detailed presentation of Dungo IV (Angola), including all historical, contextual, environmental, hydrographical, geological, chrono-stratigraphical and lithic technological details. Finally, we discuss the process of coastal use and ‘territorialization’ during the ESA, to shed light on the earliest evidence of strategic hominin adaptations.

## The emergence of coastal sites and behaviors in southern Africa: Current hypotheses and problems

The southern Cape coast of South Africa preserves evidence of coastal adaptations [3, 19–22]. Here, such adaptations are associated with the Middle Stone Age (MSA) and the emergence of ‘modern behavior’ (i.e., symbolic behaviors, hafting, bone tool technology, fishing technology etc.), reflected in a range of archaeological assemblages with diverse marine faunal remains and in particular, rich shellfish caches [13, 19, 21, 23–26]. The earliest evidence of shellfish gathering in southern Africa is preserved at Pinnacle Point 13, dated to c. 164 ka [27], and the early symbolic use of shells is also associated with the MSA, c. 75 ka, at Blombos Cave [28]. These ‘coastal behaviors’ become more prevalent with time [24], particularly during the Later Stone Age (LSA) [19, 29] that emerges during the Final Pleistocene [30].

However, different types of coastal behaviors occurred in the past, and these have formed varying signatures from dense shell middens to scarcer lithic scatters [31, 32], or evidence related to ephemeral beach activities such as algae collection or cetacean scavenging [33–35], where evidences are prone to disappearing with the tides. The invisibility of some of these coastal activities is well-known though, captured in southern African ethnographic records since the 17<sup>th</sup> century [35–40].

Coastal resources include all those available to humans adjacent to the coast, directly linked to these types of environments, and they can either be vegetal-, animal- (marine and terrestrial) or mineral-based. “*Coastal adaptation*” is defined as the systematic use of coastal resources within technical and subsistence strategies [3, 22, 41]. However, if coastal adaptation implies coastal resource acquisition, coastal resource acquisition does not always depict a coastal adaptation phenomenon. Consequently, it is hard to assess a coastal adaptation phenomenon

without relying on a large corpus of contemporary sites, where we can then collectively assess multiple strands of evidence to develop more holistic understandings of early human behavior. When the archaeological record reflects coastal resource exploitation, that are not the primary subsistence strategy focus, then the expressions “*coastal use*” [41] and “*coastal engagement*” [42] have instead been suggested.

Several authors have explored why numerous ESA coastal sites have been discovered, coupled with only much younger evidence for “*coastal adaptation*”, and varying arguments have been proposed to account for this. Among the arguments, coastal environments are regarded as being complex, unstable and unsafe, thus creating a cognitive barrier [16, 43–46]. Consequently, pre-sapiens hominins would have conducted a ‘passive’ colonization of coastal areas, whereas *Homo sapiens* would have conducted a more ‘strategic’ one [47] leading to a heavier reliance on coastal resources from the very end of the Middle Pleistocene [48]. Yet, great importance is assigned to aquatic, coastal and marine resources and their facilitation of biological and social development of early humans [43, 45, 49–56]. Consequently, one may ask why there is such a scarce record of aquatic resource acquisition during the ESA?

However, we must consider that most coastal activities may remain invisible to archaeologists, especially early ones in Pleistocene open-air contexts during the ESA [57]. This inequality in archaeological visibility is due to one, the type and spectrum of targeted resources and their ability to fossilize (e.g. shell, seaweeds, cetacean’s fat, oil and meat, lithic etc.), two, to site formation process—especially for the Pleistocene (cave vs. open-air sites), and three, to site location (e.g. on-beach activities vs. movement of coastal resources toward living sites). Well-preserved cave deposits along the southern Cape coastline of South Africa provide suitable excavation conditions and they provide a detailed vision of MSA subsistence and technical behaviors along the coast. In contrast, very few coastal ESA sites have been excavated and when they have been, they barely preserve fauna, their site-formation processes are complex, and/or the archaeological deposits are usually disturbed [32, 57–61]. Consequently, the contrast that exists between ESA and MSA site preservation and data resolution is highly likely to impact our current understanding, and this should be considered more carefully when we explore the proliferation of technical behaviors and strategies, especially if there is the potential for some of these activities to be more deeply rooted in time. In addition, since the beginning of the 20<sup>th</sup> century authors have reported that ESA artifacts are present in coastal deposits (marine terraces, also called “raised beaches”, river terraces from “near coastal rivers” [56] and sand dunes) all over southern Africa [see review in 62], and especially along the Atlantic coast where the arid and semi-arid environments of the Karoo-Namib and the Cape *fynbos* prevail [62–66]. Good examples are provided by Klasies River and Pinnacle Point, where ESA artifacts are numerous and found scattered on the surface [32, 65, 67], in contrast with the well-stratified and -preserved MSA cave records in the same area [3, 24, 68, 69]. This confirms the antiquity of human occupation along the coast, prior to MSA coastal adaptation, but also points towards potentially different trends between MSA and ESA coastal landscape occupations [70].

Very few ESA coastal sites have been studied, but collectively these sites have the potential to clarify the earliest human dispersals within the southern African coastal plain and they may be significant for understanding the emergence and development of complex subsistence and technical behaviors associated to MSA. Indeed, the ESA sites may also highlight a more deeply-rooted emergence of coastal behaviors in southern Africa, which may move us away from the idea of ‘rapid changes’ related to the emergence of *Homo sapiens* and MSA modernity [57, 61]. This impression of rapid MSA change must be questioned while considering preservation biases and the visibility of past human activities. Lastly, the impressive coastal MSA record contrasts with the ESA open-air coastal sites, but this may be the result of a research

bias at least partially driven by epistemological forces (such as the tripartite division of the Stone Age, the 'quest' for "modernity evidence", and a focus on ESA karstic and hominin-bearing cave deposits *versus* terraces). The coastal MSA hypothesis may also be related to a lack of contemporary MSA data from inland southern African, which has been discussed recently by colleagues [26].

### Earlier Stone Age site distribution, chrono-cultural and paleoenvironmental contexts

The geopolitical context of southern Africa has influenced the scientific narrative and research traditions across this region, leading to biases in our knowledge accumulation [71–74]. The division of the southern African coastal plain, across geopolitical boundaries, has created differing research traditions and goals by country. It has led to inequalities in site valorization and has further hampered our vision of early coastal occupations across the broader coastal plain. In some areas, such as the Cape provinces, focus has been on understanding the emergence of coastal modern behavior, whereas other regions are helping to 'fill the gap' while clarifying coastal site distributions [16, 42, 61, 75]. To provide some examples, in Namibia most coastal plain research has been focused on geology, given the important diamond bearing deposit caused by the Orange River drainage system, with work subsequently being supported by diamond mining companies [76]. Numerous ESA, MSA and more recent coastal sites have been reported here, but they remain unstudied [60]—contrary to the Holocene sites [18]. In Mozambique, only a few coastal sites have been reported, such as Maputo (named "Revez Duarte" in the publication) by Barradas [77], Buzi Company and Ponta Maona reported by Barradas in Clark's *Atlas of African Prehistory* [78]. Finally, in Angola, many surface finds have been reported along the coast with a higher density of artifacts in the Benguela Province and at Palmeirinhas, south of Luanda [79]. However, this corpus is mainly published in Portuguese or in Portuguese editions, and remains poorly disseminated and integrated into modern research.

We have built up an exhaustive list of coastal localities (excavated and surface sites) that are reported as bearing ESA evidence in the southern Africa coastal plain (Fig 1 and S1 Table). The list contains 237 localities reported from the 20<sup>th</sup> century until now. Due to the antiquity of some publications, the absence of dating, the lack of nomenclature homogeneity among lithic techno-types, and the unstandardized site descriptions, we have not attempted to assign them chrono-cultural attributions (i.e., within the global ESA, e.g. "Pebble Culture", "Oldowan", "early/middle/late Acheulean") and instead, we have opted to consider them as "undiagnostic ESA" localities [80, 81]. A large part of them were reported by O. Davies while he traveled east to west, following the coast to provide a global view of the quaternary paleo-shorelines and their relation with inland river basins geomorphology [63, 64, 82–87]. One must also consider that many assemblages were gathered, stored and/or registered in museums, unpublished, as is the case for several Angolan and Namibian sites at the Museu Nacional de Arqueologia de Benguela and at the National Museum of Namibia, respectively. As a direct result of this, the authors were also able to find assemblages for Dungo XIII, Pima and Lüderitz (see S1 Table). Overall, our synthesis shows a high density of ESA localities along the coast between Luanda and the current South African-Mozambican border, and their distribution coincides with the southern African coastal plain and the extent of the preserved Pleistocene coastal deposits [88]. Naturally, this raises questions for the southern African ESA and whether there existed a coastal-specific occupation, or whether this distribution merely represents a preservation bias. However, when comparing our synthesis with the corpus provided by other



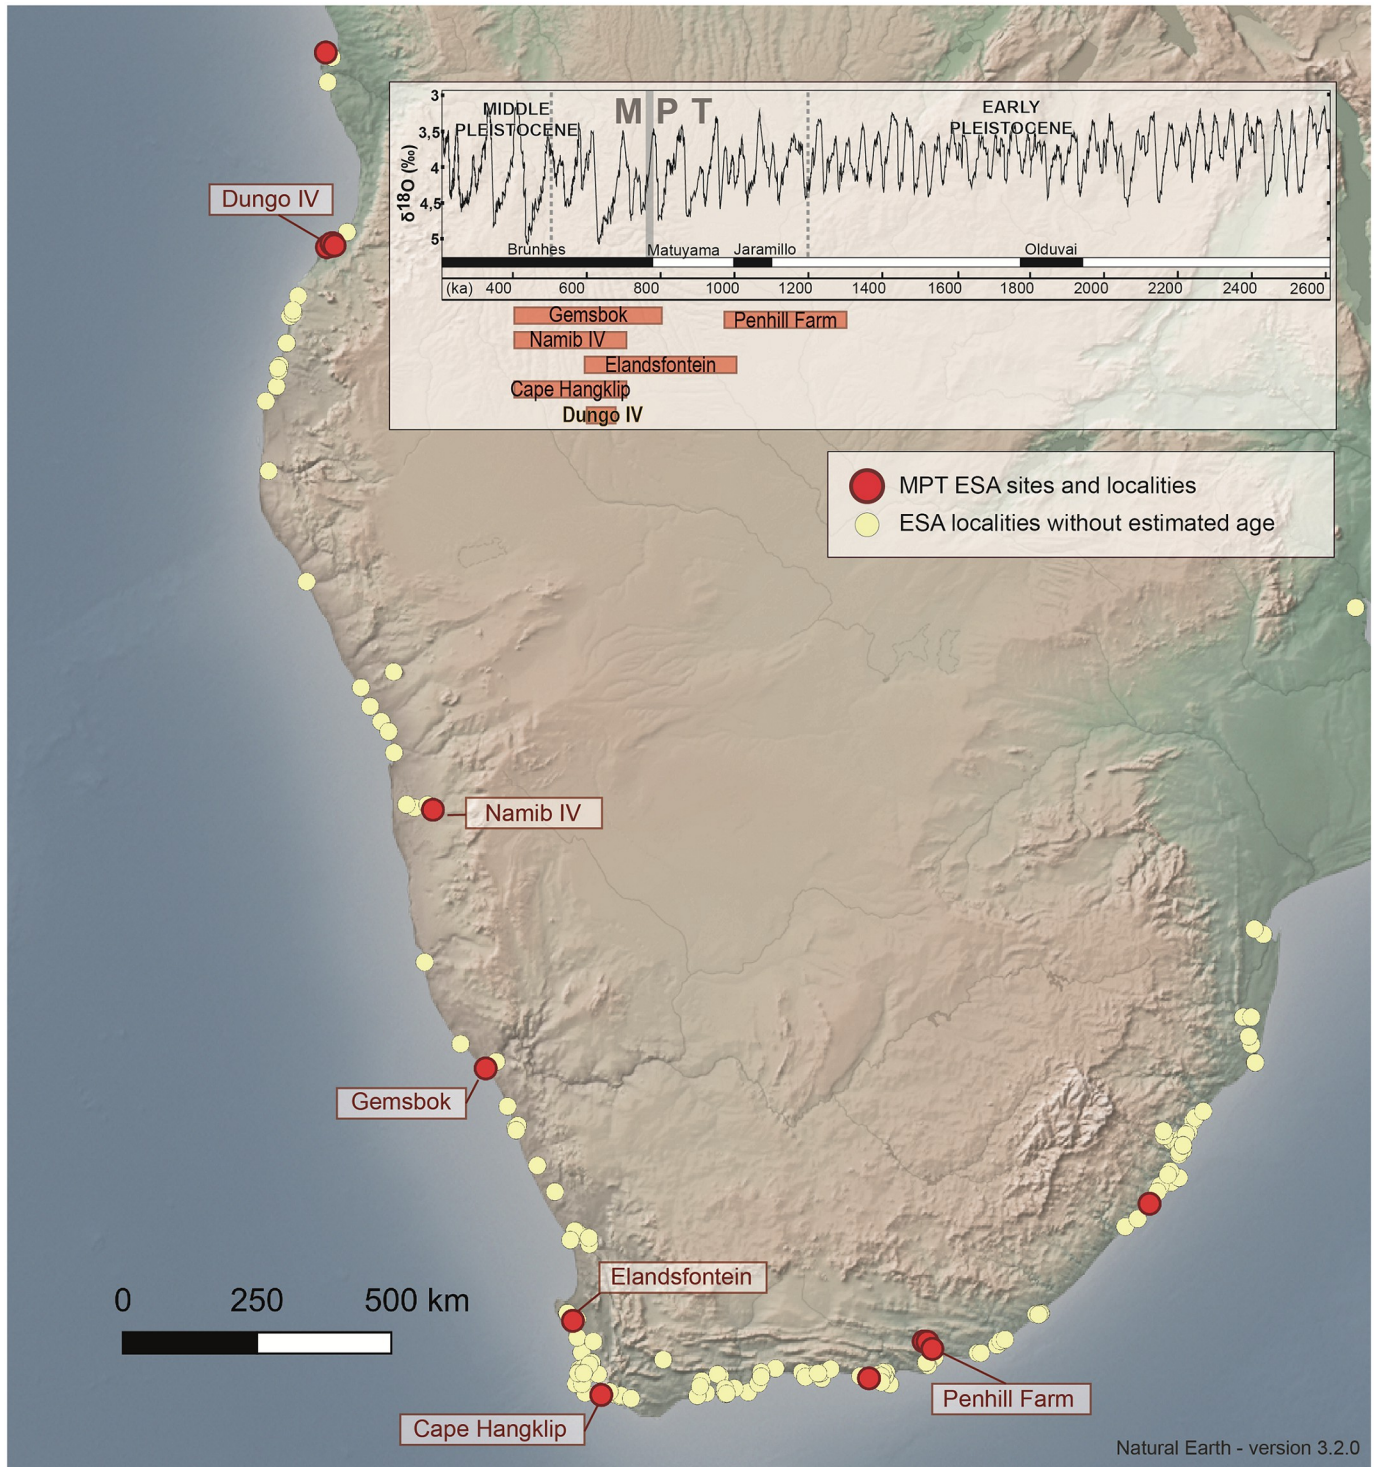

**Fig 1. Map and chronology of coastal ESA localities and localization of sites considered in the paper.** For details see [S1 Table](#). Reprinted from Natural Earth under a CC BY license, with permission from Natural Earth, original copyright 2022.

<https://doi.org/10.1371/journal.pone.0278775.g001>

coastal areas of Africa (e.g., preserved raised beaches along the Red Sea coast), the southern African ESA site density appears to be dense [89].

From a chronological perspective, despite the small number of dated sites among marine terraces (also called “raised beaches”), we regard the main coastal ESA sites as: Namib IV and Gemsbok in Namibia, and Elandsfontein, Cape Hangklip and Penhill Farm in South Africa (Fig 1 and Table 3). For Angola, only Dungo IV provided reliable dating and a representative lithic assemblage within a Middle Pleistocene raised beach. Collectively, these ESA sites are those with the most reliable lithic assemblages, locations on the coastal plain, and they all have a minimum date of 400 ka.

Most of these sites are contemporaneous with the middle and later Acheulean, from at least ca. 1 Ma onwards [90] and from a paleoclimatic perspective with the Mid-Pleistocene Transition (MPT), which spans c. 1.2 to 0.5 Ma [91–93]. It is difficult to delimit the MPT boundary, due to the gradual emergence of c. 100ka climatic cycles, but the transition begins with an increase in glacier volume between 1.25 Ma and 0.7 Ma [94, 95]. During this transition from the Early to Middle Pleistocene (boundary fixed at 0.781 Ma), the change in climatic cycle duration (from c. 40 ka to c. 100 ka) led to more pronounced global climatic changes and, more specifically, drier Glacial periods with more humid Interglacial periods [96]. The MPT is also associated with strong climatic oscillations which may have impacted human and animal dispersal [97], and southern Africa may have formed a refugium at the very beginning of the Middle Pleistocene [98]. This change may also be partly responsible for the formation of raised beach systems, and it was a major event that contributed to the extension of the coastal plain in South Africa during lowered sea levels [99, 100]. Some parts of the South African coastal plain are very narrow (where the shoreline is very close to the foot of the Great Escarpment) and it is assumed that marine transgressions may have completely submerged the coastal plain during periods of high sea level, directly impacting human occupations [100–103]. However, due to variability in seabed depth, coastal plain width and topography, assessing these occupations is complex and it can only be tackled with a combination of local approaches [104]. It is also particularly important to clarify site-scale geoarchaeological issues for sites within 20km of the coast, that remain buried in river or lacustrine deposits, as they could have been much further inland if they were occupied when the coastal plain was “open” [101] or much closer to the coast and the coastal plain was “closed” [105].

From a paleoenvironmental perspective, the current southern African Atlantic coastal plain environment, namely the Namib desert associated with the upwelling Benguela current, is believed to have been established. But, alternating climatic cycles leading to arid and semi-arid environments was common since at least the Early Pleistocene [106–108]. The upwelling Benguela may have mitigated the importance of climatic oscillations in this region, even though a progressive decrease in surface sea water temperature is recorded between c. 1.5 and 0.5 Ma [96, 109, 110] that we must correlate to aridification of coastal environments in western southern Africa [111, 112]. Consequently, hominin occupation of the coastal plain occurred during a paleoclimatic trend to aridification.

From an African Prehistory perspective, since c. 1 Ma, important changes are noted [113] in terms of technology—corresponding to the transition to the “middle Acheulean”—[90, 114, 115], subsistence behaviors [116] and mobility [117], which collectively may also indicate increasing demographic dynamics [118, 119]. In addition, southern Africa site density may already provide an indication of regional demographic changes ca. 1 Ma [120–122]. However, it remains unclear to what extent this can be linked to shifts across the MPT, and/or to the development of *Homo* across the African continent, considering that no other hominin genera are encountered from c. 1 Ma [113, 123, 124].

## An earlier emergence for coastal sites and behaviors? Existing hypotheses and questions

MSA behavioral trends along the southern African coastal plain reflect complex technology and symbolism, along with strategic food resource exploitation [3, 8, 14, 20–22, 24, 28, 125–128]. Even though ESA human behaviors on the coast remain poorly investigated and are primarily understood by describing lithic remains, they prove that humans colonized coastal areas in southern Africa well before the emergence of the MSA. These ESA hominins must therefore be considered in the broader context of changes associated with the MPT, though no correlation has yet been established. There is only sporadic detail in the literature on the presence of ESA hominins in the southern African coastal plain, for a variety of reasons, and below we summarize the following:

- Coastal raw material procurement: use of sandstone and quartzite pebbles and cobbles [85], as seen along the Eastern Cape coast, or silcrete block procurement along the coast in Namaqualand [5]. This may help to explain the scattered nature of surface artifacts as described by authors.
- Rivers as dispersal corridors: hominin migrations being linked to river courses that were conducive to progressive settlements along the lower part of river basins, eventually leading to coastal areas [57, 60, 129–131].
- Coastal refugium: the likelihood that coastal areas served as a refugium for human and animal populations [59, 100, 132–134]—especially during increased aridity inland. In the Cape Peninsula, Glacial periods are characterized by more humid climates [133, 135]. Further north, the Namib coastal desert would have been occupied by humans during semi-arid periods, which facilitated the formation of pans and savanna that may have prevailed during quaternary interglacial periods [136–139]. This hypothesis has also been formulated to explain the high-density of MSA sites in the Paleo-Agulhas Plain [20].

Questions concerning the relationship between coastal occupation and river courses remain unanswered: are these occupations specifically “coastal occupations”, or are these peripheral “riverside occupations” as seen elsewhere in southern Africa? Also, what would be the driving force behind such a coastal demographic phenomenon: coastal aridification during the MPT, the opening of the coastal plain c. 1Ma, or demographic changes during the Acheulean? Another issue is how to address the relationship between these coastal settlers and their resource exploitation patterns with the absence (or notable scarcity) of organics. Nevertheless, the distribution of sites and these different hypotheses lead us to an important finding: coastal spaces begin to form part of group “territories”—irrespective of whether their use is marginal or fully integrated. “Territory” is defined here as a space for human ideas and practices, which includes limits, designation and organization [140–144]. Consequently, “territorialization” is the process during which a space gets integrated into a group’s territory through the development of new practices associated with specific locations [143, 145–147]. Indeed, territorialization is the process linked to human settlement during which ‘territorial behaviors’ are developed [148]. ‘Territoriality’ refers to a type of human behavior, where ‘territorial behaviors’ concern all aspects of the relationship between human groups and the space they exploit (e.g. delimitation and division of space, denomination, landscape management, property, etc.) [148–150]. The sole fact that ESA populations settled on beaches to produce stone tools, or to supply raw materials, shows that these areas were related to territories—even though we do not have direct evidence for coastal resource foraging.



## The contribution of the Angolan coastal record

An important shortfall of the hypotheses summarized above is that the authors were working with limited spatial datasets that were unable to provide a more holistic vision of coastal ESA occupations across southern Africa. In fact, no hypotheses have considered integrating data from the Angolan coastal plain. Publication language, a lack of dissemination of Angolan data beyond its borders, and the persistence of two wars (1961–1975; 1975–2002) have all contributed to isolating research in Angola [151, 152].

There are two primary coastal ESA localities that have been excavated in Angola, Palmeirinhas by J.D. Clark and C. Ervodesa in the 1960s and 1970s [79, 132] and Dungo IV by a Franco-Angolan team led by M. Gutierrez and M.H. Benjamim since the 1990s [153–155]. The Dungo sites are located on a +100 meter raised beach south of Baía Farta in the Benguela Province. Only Dungo IV has been dated, to between  $614.5 \pm 9.5$  ka and  $662.05 \pm 10.24$  ka [156], providing the earliest evidence for hominin presence in the country and making it one of the only dated coastal ESA sites in southern Africa. In fact, Dungo IV is now the most northern dated and excavated site of the southern African coastal plain, and it also marks the current northern limit of the Karoo-Namib biome. Along with Elandsfontein, Gemsbok and the Lower Sundays River sites, Dungo IV is a key-site for understanding early hominin expansions and the process of coastal territorialization along the coastal plain of southern Africa, during the MPT. In addition to Dungo IV, the Benguela Province also comprises a large number of unexcavated sites, but these are assumed to share a similar stratigraphic position among the +100 meter raised beaches, among which: Mormolo, Punta das Vacas, Sombreiro, Pima, Macaca and Uche [157, 158] indicate an extended distribution of ESA sites in the area.

To provide insight on the occupation of coastal areas and hominin behaviors in the southern African coastal plain, during the ESA and prior to regional MSA coastal adaptations, this paper focuses on Dungo IV and its micro- and macro-regional context. The site is dated, it preserves a large quantity of lithic artifacts, and it forms part of a broader network of ESA coastal sites that are well-preserved among the raised beach deposits of the Benguela Province. Here, we review the history of the Benguela raised beach sites (geology and archaeology), the chrono-stratigraphic context of Dungo IV, and for the first time we present detailed results for a qualitative technological analysis of the lithic assemblage. Finally, we discuss Dungo IV in relation to the broader context of early hominin coastal occupations in southern Africa. By providing clarity on the Benguela coastal ESA sites, we believe they will shed light on territorialization during this period and consequently, will allow us to explore the initial steps that humans implemented when adapting to coastal environments and resources.

All necessary permits were obtained for the described study, which complied with all relevant regulations (Permit 01/GD/MNAB/2020 provided by the Museu Nacional de Arqueologia de Benguela—Article 8 of the Organic Statute).

## Dungo IV and the pleistocene deposits of the Benguela Province

### Environmental and hydrographical settings of the Benguela Province

The coastline of the Benguela Province extends over a steppe coastal plain dominated by shrub and herbaceous plant taxa, including *Acacia*, *Commiphora*, *Colophospermum*, *Aristida*, *Schmidtia* and *Setaria* [1, 159]. The plain extends from the town of Sumbe to northern Namibia. The prevailing climate and vegetation are conditioned by the strong dry offshore winds and the direction of the ocean currents [160]—especially driven by the Benguela Current [161]. The climate is tropical with concentrated rainfall in summer and a dry period in winter [162]. This coastline is part of the broad West African marine ecoregion that extends from

Cape Blanc in Mauritania to Cape Frio in Namibia [163], but it is also integrated into the coastal kingdom of “Temperate Southern Africa” [164]. The southern coast of Angola is an important thermal boundary between tropical western Africa and southern Africa with the meeting of warm currents from the north and temperate-cold currents from the south [163].

Despite the lack of paleoenvironmental data for the Benguela Province, on the +50 meter raised beaches of Baía das Pipas, between the cities of Benguela and Namibe [163], Middle Pleistocene malacological assemblages indicate 'Senegalese Fauna' down to southern Angola. Senegalese Fauna is a typical West African tropical malacological suite that extended into North Africa during interglacials [163]. However, this faunal assemblage is associated with a malacofauna that also reflects a more temperate climate, the presence of which would be due to upwelling induced by the Benguela Current. The conclusions of this work are in line with those of [165] for the Middle Pleistocene, whereby it has been suggested that climatic conditions close to those in the region today occurred during the Pleistocene. Similar settings have also been suggested for the coastal zone of southern Namibia during this period [60].

The Benguela Province occupies a total area of 39,508 km<sup>2</sup> with altitudes ranging from sea level to 2,547 m towards the east. The province is primarily encompassed by the Catumbela and Balombo river basins, and from Lobito to 60km south (Dombe Grande) there is a coastal strip with an average width of 20 km where the altitude does not rise above 280 m, forming the coastal plain that is delimited inland by the End Rift Unconformity and the foot of the Angolan Plateau. The strip is characterized by well-preserved Mid-Pleistocene to Holocene raised beaches (Fig 2), and the area of archaeological interest is located between the basins of the perennial Cavaco River (3,983 km<sup>2</sup>) and the Coporolo River (9,505 km<sup>2</sup>). Between these rivers there are small hydrographic basins with streams that only carry water when sporadic heavy rains occur (locally named “*rio secco*”). These smaller non-perennial streams barely extend inland, and from north to south they are the: Uche (103 km<sup>2</sup>), Mormolo (288 km<sup>2</sup>), Pima (78 km<sup>2</sup>), Dungo (389 km<sup>2</sup>) and Calupete (221 km<sup>2</sup>) rivers (Fig 2). In the terminal outflow of these basins, the topography of the terrain is unique given the presence of raised beaches, where abundant prehistoric sites are encountered whose names often relate to these non-perennial river courses [79, 157, 158].

## Geological context of the raised beaches

The sites discussed here have all been identified in these marine formations and they are associated with the highest Quaternary raised beaches (or marine terraces), whose altitude varies between 90 and 150 m above sea level and having been referred to as “Acheulean terraces” by others [79, 153, 157, 166, 167]. These terraces have five main geological units (Fig 3B). First, two Tertiary units are identified:

- a siltstone deposit attributed to the Miocene (23.03 Ma—5.33 Ma) [79] or possibly as old as the Paleocene (66 Ma-56 Ma) [168],
- a deposit of sandstone, in the literature called 'Sombreiro sandstone' [166].
- Second are the four Pleistocene units:
  - a 'marine conglomerate' in which many shells are observed, including *Arca senilis* L. and *Ostrea* sp. whose age is attributed to the Calabrian (1.8 Ma—0.78 Ma) [160, 166],
  - a deposit of gravels with clasts ranging from 1 to 20 cm in diameter, interpreted as a fossil beach level [157] that served as a raw material outcrop for ESA hominins in the area [169].



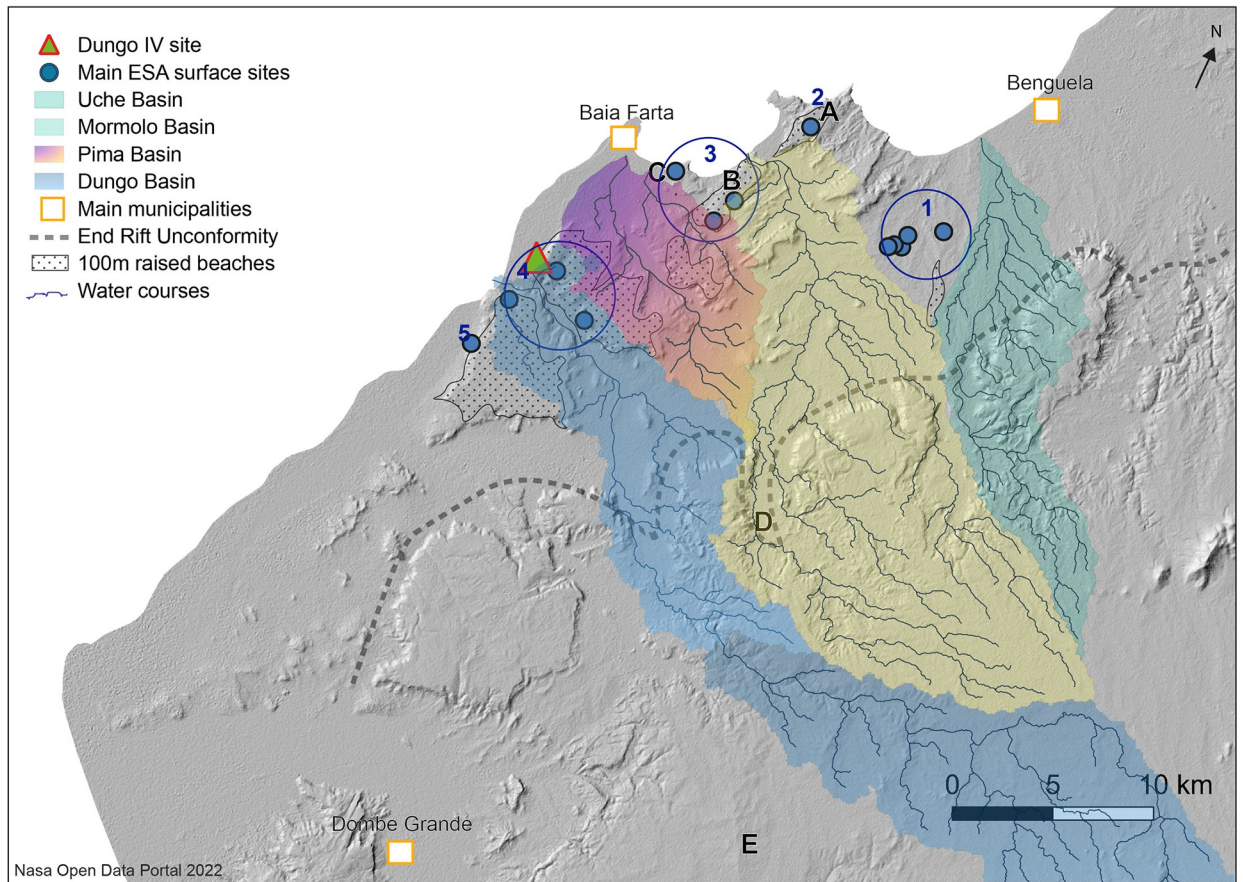

Nasa Open Data Portal 2022

1: Benguela sites 2: Morro do Sombreiro 3: Mormolo sites 4: Dungo sites 5: Macaca

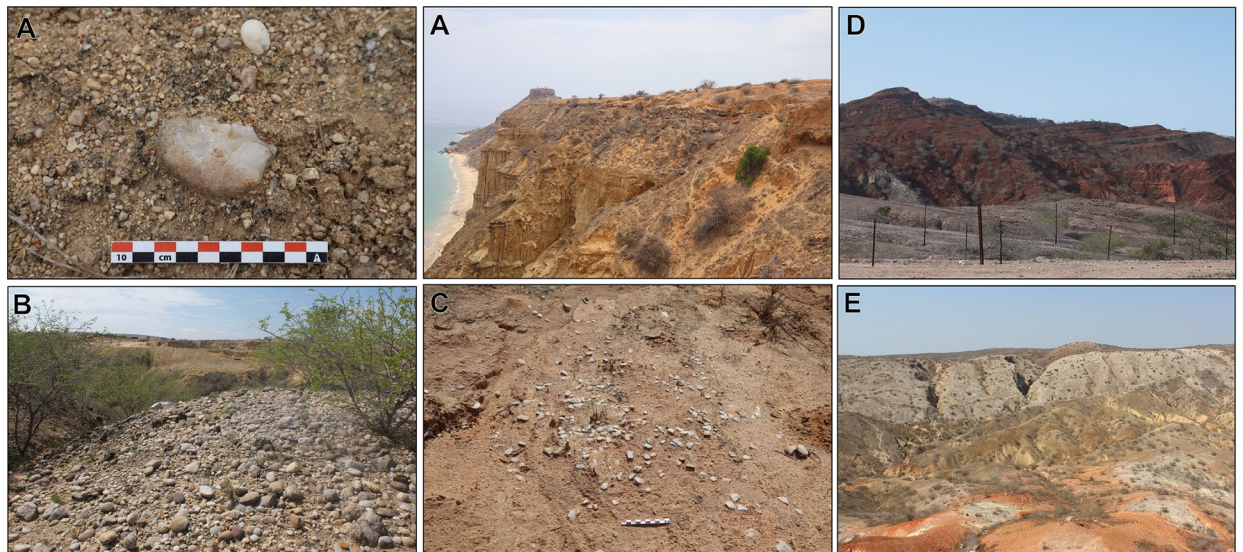

**Fig 2. Locality of the ESA surface sites and Dungo IV on the +100 m raised beaches between Benguela and Dombe Grande, based on Museu Nacional de Arqueologia de Benguela records, surveys and test-pits (157,158), and hydrographical settings of the areas.** The photo letters refer to the letters on the map and show Morro do Sombreiro Red Sand deposits on the +100 m raised beach (A), the cobble/pebble outcrops of the +100 m raised beaches at Mormolo (B), a quartz lithic workshop on a deflated surface within the base of the Red Sand deposit of the +100 m raised beach at Ponta das Vacas (C) and the End Rift Unconformity landscapes (D and E)—Hydrographical settings have been mapped by J. Matos and photos are from I. Mesfin. Reprinted from Nasa Open Portal under a CC BY license, with permission from Nasa Open Portal, original copyright 2022.

<https://doi.org/10.1371/journal.pone.0278775.g002>



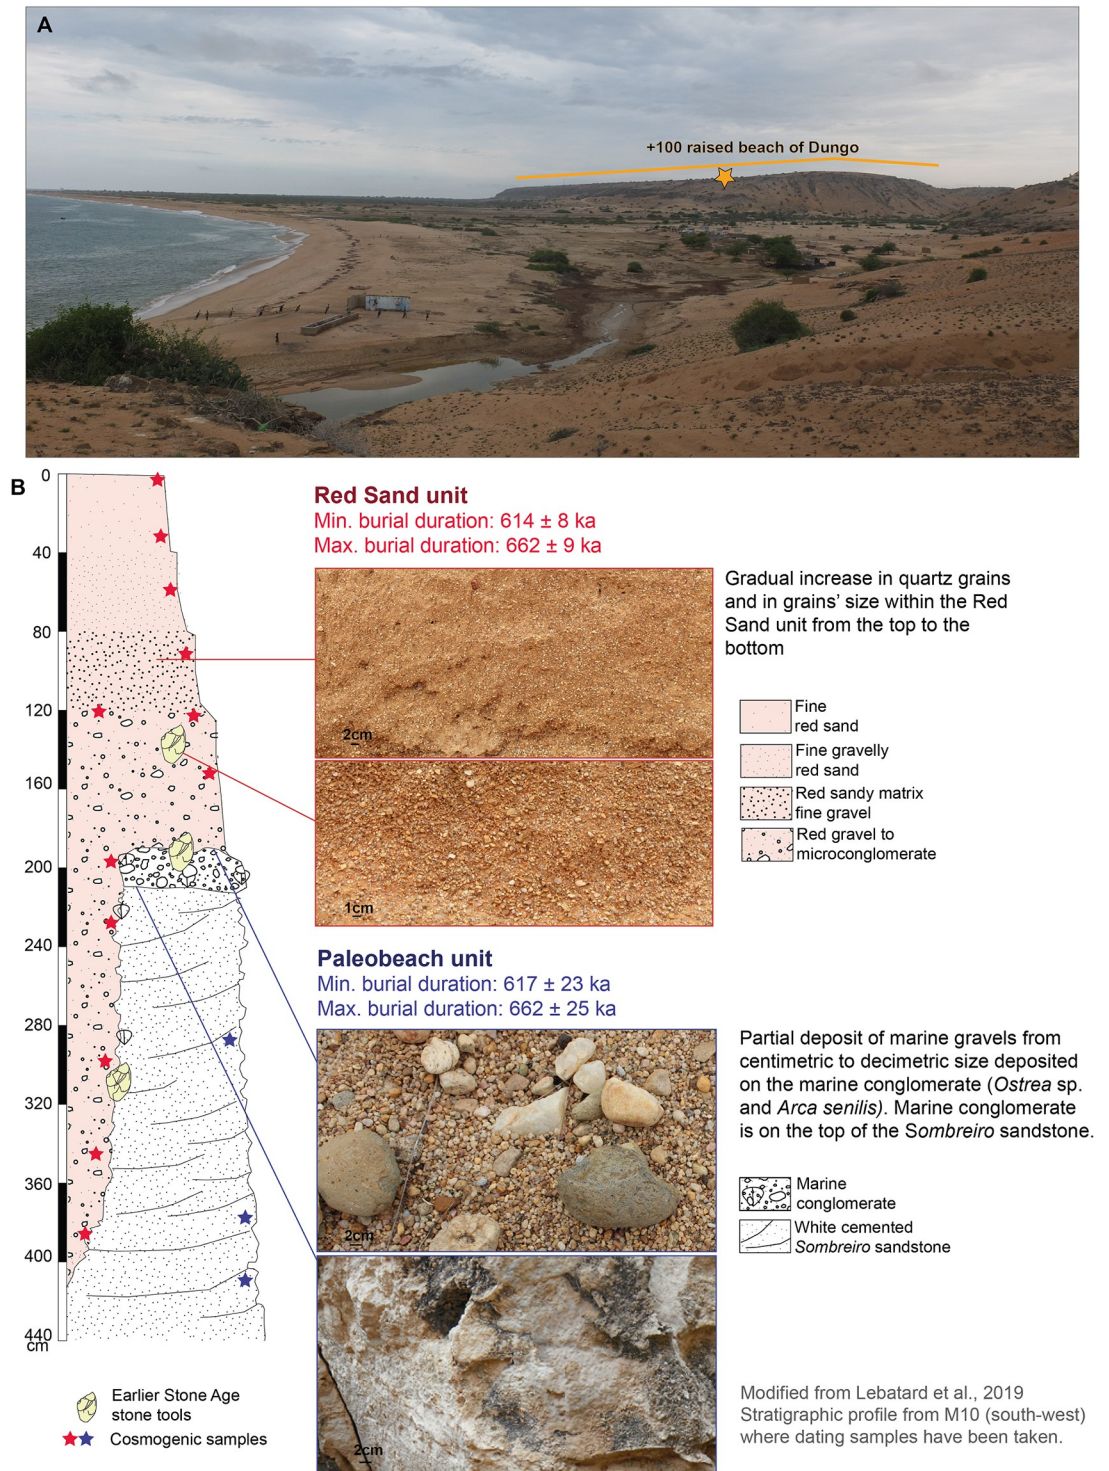

**Fig 3. A:** Stratigraphy of Dungo IV from 2018–2022 fieldwork; **B:** overview of the geological features of the +100m raised beach at Dungo IV; **C:** a layer of quartz artifacts on the top of the layer « red gravel to microconglomerate » of the Red Sand unit, identified in 2022 within the profile of a test-pit from 1994.

<https://doi.org/10.1371/journal.pone.0278775.g003>

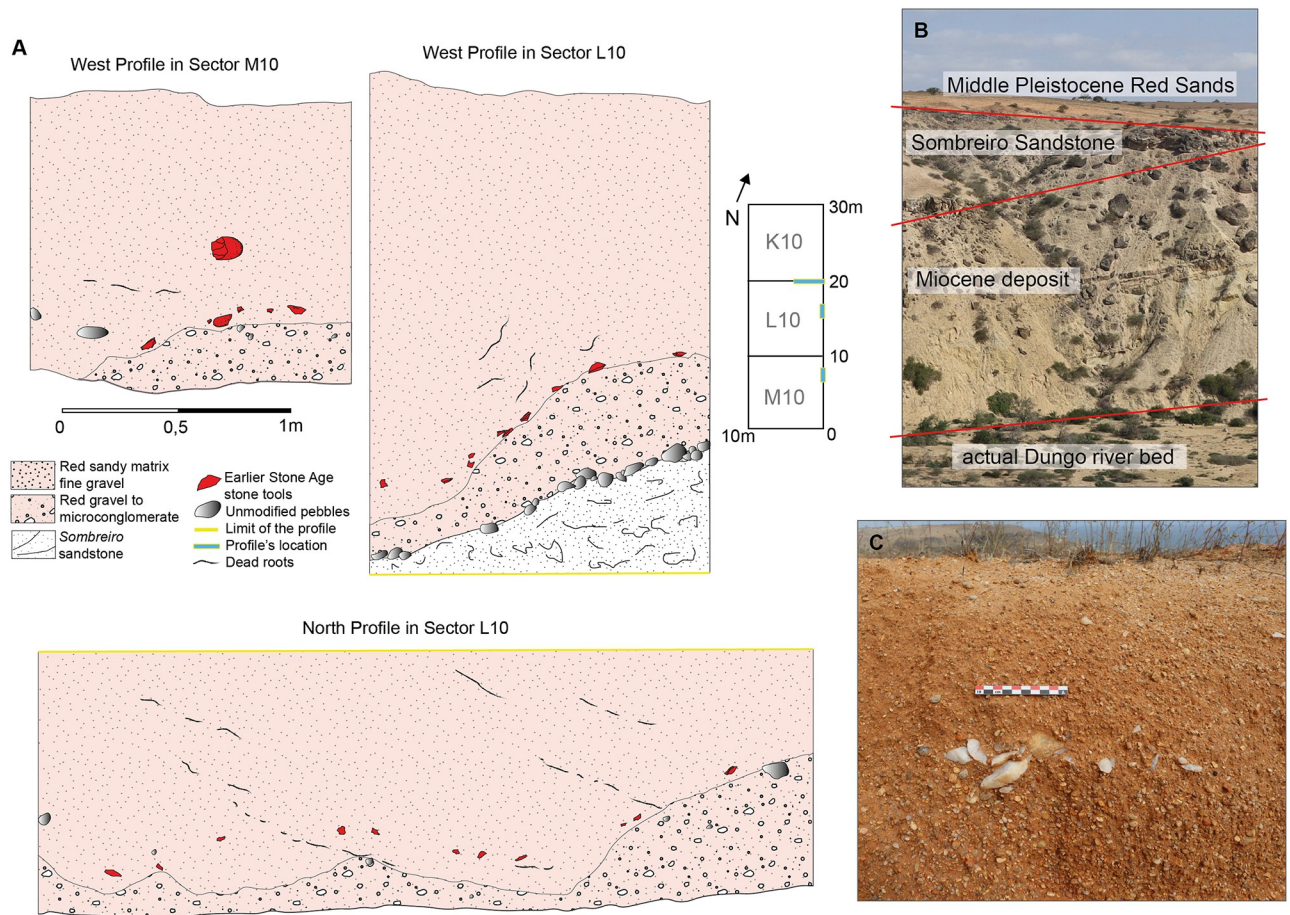

**Fig 4.** A: View of the +100 m terrace from the estuary of the Dungo river. B: Dungo IV's sampling locations, stratigraphic log and modeled burial durations [modified from 149].

<https://doi.org/10.1371/journal.pone.0278775.g004>

- an overlying, thin white sand layer on top of the conglomerate, but reported only in some localities [153, 158],
- a sandy deposit, namely the 'Red Sand unit', that is up to 20 m thick and dated to the Middle Pleistocene (possibly of deltaic origin). The Red Sand unit is graded beginning from the soil surface with a layer of fine-grained red sand with few fine gravels to red microconglomerate (Figs 3C and 4B). The basal meters of the Red Sand unit contain the ESA artifacts [153, 156, 157, 170].

The altitude of these marine terraces is the result of vertical tectonic uplift and significant erosion of the Tertiary formations during the Quaternary, creating a stratigraphic hiatus between the end of the Miocene and the beginning of the Pleistocene [88, 160, 165, 170]. [160] attempted to date the marine terraces between the towns of Lobito and Baía Farta by running  $^{230}\text{Th}/^{234}\text{U}$  analyses on mollusk shells. They obtained ages for the 8–10 m ( $36 \pm 3$  ka), 10–12 m ( $91 \pm 6$  ka), 20 m ( $103 \pm 5$  ka) and 25–30 m ( $71 \pm 7$  ka) terraces, but were unable to date the terraces beyond +100 m. However, these dates are debated and revision is needed [171]. Irrespective, these dates suggest that the low-lying marine terraces were formed throughout the Late Pleistocene (126 ka–11.7 ka BP)—a period with increased tectonic uplift



[171]. Other colleagues [170] distinguished three types of marine terraces from Lobito that J. D. Clark previously correlated with terraces of southern Luanda [132], namely: “Ouljlian terraces” (10–30 m) spanning the Upper Pleistocene, “Tyrrhenian terraces” (30–50 m) spanning the late Middle Pleistocene, and the “Old terraces” also named “Acheulean Terraces” (90–150 m) or “+100 m raised beaches”, attributed to the Middle Pleistocene and which are the focus of this paper.

From a broader perspective [88], distinguish two types of marine terraces in southern Africa: those which have a vertical uplift rate of 0.01 mm per year, and those in Angola and Namibia where the uplift rate is much higher, estimated to be 0.07 mm per year. This difference resulted in higher raised beaches in Angola and more pronounced stages than in the Cape regions, for example, where the marine shelves are less subject to tectonic uplift [172]. The oldest raised beaches on the Atlantic coast of southern Africa are estimated to be younger than 1 Ma and older or contemporary with the Middle Pleistocene [88, 100, 102]. Therefore, the oldest raised beaches are prime areas to address Acheulean coastal settlements during the MPT.

### Review of Earlier Stone Age research

The richness of the Pleistocene archaeological record in the +100 m raised beaches has been reported since the 1950s by several geologists prospecting the area for resource exploitation purposes. However, it is when J.L.M. Pais Pinto created the *Museu Nacional de Arqueologia de Benguela* in 1976 that archaeological excavations were initiated at Dungo. He also prospected the coastal zone around Benguela and discovered several new sites among which several localities at the raised beaches of Mormolo, Uche, Pima, Punta das Vacas and Morro do Sombreiro. ESA artifacts have been found in varying quantities across these localities, suggesting a range of occupations. Unfortunately, the lithic collections stored at the museum remain largely unpublished but they are currently under reappraisal [173].

At Dungo, Stone Age artifacts were first reported by geologists M. Neto [174–176], S. de Carvalho [167] and M. Feio [166], and initially it was J.D. Clark [132] and C. Ervedosa [177] that conducted studies on the surface lithic scatters (the site was published then as “Baía Farta”). The first excavations focused on an undated MSA site at Dungo III, but from the late 90s and in the context of a new collaboration with Sorbonne University, new excavations began to focus on the ESA deposits [153, 154]. The same team also discovered the site of Dungo V, where a stranded cetacean (*Balaneoptera* sp.) was discovered on the margins of a palaeo-lagoon estimated to be c. 1 Ma by biochronology and >350 ka by  $^{234}\text{U}/^{230}\text{Th}$  on oyster shell remains [155, 178]. The articulated carcass spread across 6m and was associated with 57 lithics rich in flakes and pebble tools, among which several presented use-wear consistent with butchery activities [34, 178–180]. Consequently, Dungo V presents most of the patterns that could be used to argue for a single carcass site [see patterns proposed by 174, 175, 181], suggesting there is early evidence for coastal resource acquisition by hominins despite that dating efforts have proven difficult.

### The Dungo IV excavation and dating program

Fieldwork at Dungo IV began in 1994 under the direction of M. Gutierrez [155]. After digging nine test pits of various sizes to understand the stratigraphy and to assess the level of site disturbance, an extensive planimetric excavation was initiated in the 10x10 m sector M10, which was subsequently extended northward to sectors L10 and K10 (Fig 3A). In total, 300 m<sup>2</sup> were excavated but only the M10 and K10 sectors were excavated down to the level of the marine pebbles/cobbles and marine conglomerate, which are highly variable in depth. The excavation

was carried out by following artifact inclinations in order to follow the archaeological levels. This method was chosen because it was not possible to excavate following the sedimentary sub-units of the Red Sand unit due to: one, the deposit thickness, which is not compatible with fine excavation methods (the sedimentary units are too thick and cover a long time period), and two, the difficulty in identifying transitions between the sedimentary sub-units (transition between sub-units appears gradual in many parts of the excavations). All the material was recorded manually on an orthonormal plane ( $x, y, z$ ) and each piece was plotted on millimetric paper. All the original fieldwork archives are stored at the Museu Nacional de Arqueologia de Benguela. However, there was no systematic sieving of sediment. Thus, we cannot access the finest lithic fraction, which is often invisible to the naked eye. During excavations, four beds of objects were identified, forming the four archaeological levels of Dungo IV. Concurrently, four different sedimentary sub-units were distinguished among the Red Sand unit [153]. Lithic artifacts were predominantly located in the sedimentary sub-unit “red matrix sand gravel” (Fig 4).

The lithic industry found during the excavation contrasts notably with the observations made on the surface assemblages by Clark [132] and Ervedosa [177], who emphasized diversity in the Large Cutting Tools (LCTs; defined as  $>10\text{cm}$  tools made by shaping or retouch and presenting at least one cutting edge) made from large quartz flakes (such as typical handaxes and cleavers). In fact, it is a quartz pebble/cobble-based lithic industry among which LCTs appear to be rare [153]. In this context, it has been suggested that Dungo IV was a pre-Acheulean site. This techno-cultural attribution was preliminarily dated by cosmogenic nuclides ( $^{10}\text{Be}/^{26}\text{Al}$ ), providing burial ages ranging from c. 0.7 to 2.1 Ma, but these ages were not consistent with the geological context of the site. As a new technique, cosmogenic nuclide burial dating is proving to be extremely valuable for understanding geochronological and landscape evolution issues at sites across southern Africa [183–187].

In 2019 new burial duration constraints were obtained directly on the two stratigraphic units identified at the site: the “Red Sand unit” in which lithic artifacts occur and the “Paleo-beach formation” which includes both the marine conglomerate and the sandstone bed. The Red Sand unit (Fig 4B) is divided into four main sub-units based on gravel size. The samples have been taken where the sandy deposit is the deepest, namely the “*Ravina*”. The “*Ravina*” area in sector M10 is a pluri-metric deep gully cutting within the Paleobeach formation, filled by the Red Sand unit and within which many artifacts have been recorded (as “*M10-Ravina*”) by the excavation team. Consequently, in the “*Ravina*”, the stratigraphic sequence exceeds 4 m of graded bedding (Fig 4B). The cosmogenic nuclide study, using the depth-profile technique on the two sedimentary units, provided an age bracketed between  $614.5 \pm 9.5$  ka to  $662.05 \pm 10.24$  ka [156] (Fig 4), suggesting Dungo IV is contemporary with the later Acheulean prevailing elsewhere in southern Africa since ca.1 Ma [90]. This age bracket also points towards rapid deposition of the Red Sand unit. The burial durations were modeled based on [188, 189]. In the minimum burial duration model, no cosmogenic nuclide production was considered after the burial of the deposits, whereas for the maximum burial duration model, the opposite was assumed. The preliminary burial durations obtained in 2010 for the four dated stone tools from the “*Ravina*” were confirmed [154, 156]. The significantly different burial durations and computed pre-burial denudation rates may imply a different history for the sampled lithics and the sediments. The proposed site formation hypotheses were either that there were diverse sources for the four quartz lithics, and/or that they each reflect different periods from the Early to Middle Pleistocene [156], which may be explained by the mixing of *in situ* lithic workshop remains with those lithics carried by the river within the Red Sand unit.



## Context of the red sand unit

In 2019 and 2022, the Red Sand unit at Dungo IV was re-investigated by authors attempting to identify the exact location of the archaeological layers within the four sedimentary sub-units, and to document the four different archaeological layers previously identified by the excavation team (between 1994 and 2015) (Fig 3). The Dungo IV profile is predominated by the “red sandy matrix fine gravel” (millimetric gravel size only), from top to bottom. It overlies the “red gravel to microconglomerate” sub-unit, comprising a high quantity of centimetric gravels among which notably more are quartz. The two upper sub-units, namely the “fine red sand” and the “fine gravely red sand” are largely eroded and not present in all profiles—especially in the western part of the excavation area. The “red gravel to microconglomerate” sub-unit is highly variable in thickness and inclination, creating an irregular topography possibly explained by water disturbance and/or, the irregular topography of the underlying Paleobeach unit; such inclinations are consistent with the inclinations of the lithics. We also documented a layer of marine pebbles/cobbles deposited on the marine conglomerate, but which is irregular and discontinuous (see West Profile in Sector L in Fig 3). In some areas, sporadic pebbles and cobbles present a surface crust made of the marine conglomerate suggesting the deposit remained under water prior to a marine regression. Consequently, on some parts of the site, the Red Sand unit is directly in contact with the marine conglomerate. Due to the absence of archaeological artifacts among these pebbles/cobbles and it being of marine origin [157, 169], we consider this deposit to be part of the Paleobeach formation along with the marine conglomerate. One main archaeological layer has been identified in the exposed profiles of the different sectors and it is encountered across the transition from the “red sandy matrix fine gravel” to “red gravels to microconglomerate” sub-units (Fig 3A). Some artifacts occur in the middle part of the “red sandy matrix fine gravel” and/or in the upper part of the “red gravels to microconglomerate”, but they are much scarcer and more scattered in comparison with artifact densities in the main layer. The transition between these two Red Sand sub-units is sometimes very difficult to assess due to the gradation of the sediments. The main archaeological layer occurs from 0 cm to 20 cm before the “red gravels to microconglomerate” (Fig 3A). Fig 3C shows the position of the main archaeological layer on top of the “red gravels to microconglomerate”. These observations suggest that the main archaeological layer cannot be easily associated to one sedimentary sub-unit of the Red Sand unit, even though it is primarily encountered at the base of the “red sandy matrix fine gravel”. It is identified by a very thin bed of lithics, mainly in quartz. The archaeological layer at times being very inclined (see “West Profile in Sector L10” in Fig 3A), it impacted the altitude of the archaeological artifacts—considerably across a 30 m long excavation area. Overall, these stratigraphic and contextual observations beg the question, are there four distinct archaeological layers at Dungo IV? The exposed profiles (30 m long and 10 m width) preserve only a single archaeological layer with variable topography. In this regard, we propose two hypotheses: one, the main archaeological layer that is visible in all profiles may be bracketed by much smaller accumulations of lithics that are restricted in horizontal space, and two, the main archaeological layer has been recorded as four different layers due to its high topographical irregularity, which may have been misleading during planimetric excavations. Only new excavations can provide clearer answers to these questions.

## Method

### The Dungo IV assemblage

The entire lithic assemblage is stored at the Museu Nacional de Arqueologia de Benguela and it comprises 2572 artifacts (without sieving). Table 1 presents a techno-typological inventory

**Table 1. Artifact inventory per layer and per techno-typological category.**

|                                                 | Layer 1 | Layer 2 | Layer 3 | Layer 4 | Total (n) | Total (%) |
|-------------------------------------------------|---------|---------|---------|---------|-----------|-----------|
| Flakes                                          | 270     | 895     | 502     | 359     | 2026      | 78.9      |
| Cores                                           | 31      | 29      | 41      | 73      | 174       | 6.8       |
| Bifacial tools (unifacial and bifacial shaping) | 4       | 5       | 6       | 8       | 23        | 0.9       |
| Pebble/cobble tools                             | 20      | 25      | 28      | 40      | 113       | 4.4       |
| Unmodified tools                                | 1       | 2       | 0       | 10      | 13        | 0.5       |
| Polyhedra (multifacial shaping)                 | 3       | 5       | 2       | 11      | 21        | 0.8       |
| Tested cobble/pebbles                           | 6       | 38      | 7       | 71      | 122       | 4.7       |
| Undetermined                                    | 7       | 48      | 8       | 15      | 78        | 3.0       |
| Total                                           | 344     | 1047    | 594     | 587     | 2572      | 100.0     |

<https://doi.org/10.1371/journal.pone.0278775.t001>

per layer. We opted to study the artifacts from all four archaeological layers together due to the low number of artifacts per layer, the tight chronological bracket, and the revised stratigraphic descriptions presented above.

### Technological approach

All artifacts have been described according to raw material types and states of surface preservation or modification (e.g. patina, fresh or smooth arrises, breakage patterns, macro-use-wear, such as percussion wear); refitting analysis has also been conducted on the assemblage [190]. For every flake (retouched or not), we recorded dorsal patterns (number of scars and orientation), butt typology, distal and cross-section morphology, and measurements according to both technological and morphological axes—relying on the nomenclature provided by Inizan et al. [191]. All the shaped tools (unifacial, bifacial and multifacial, which includes the polyhedral based on [192, 193]) were measured in their morphological orientation and we recorded the number of removal 'sequences' [see definition in 182, 183]. We identified blank types when possible (pebble, cobble, slab, block, split, cortical flake, undiagnostic non-cortical flake etc.) and the main areas which have been shaped (distal, lateral, proximo-lateral etc.). A similar set of attributes has been recorded for pebble and cobble tools and has already been partially published [169]. Cores were measured according to their technological axis [191] and reduction intensity was evaluated through the number of flaking sequences (definition of sequence based on [194]) and the number of removals per sequence. Core blank was identified when possible and all cores were grouped according to reduction strategies (e.g. orientation of removals and management of the blank volumetric patterns), but also according to the techno-morphology of the flakes which have been detached (e.g. elongated, quadrangular, convergent-edges, plano-convex) and/or those that were established during 'physical' or 'mental' refittings [195–197]. Finally, unmodified percussive tools presenting macro-use wear patterns [198–200] were measured and weighed. In addition, tested cobbles (presenting only two removals or less) were only measured. Table 2 provides basic metrics for each of these broad techno-typological categories per layer and highlights the close metrics among each group and each layer.

In addition, each core, pebble/cobble tool, shaped tool and retouched flake has been studied in detail using systematic diacritical sketches [201, 202]. These provide a chronology for removals and their relation to the volumetric patterns of the blank, and also, detail for a techno-functional analysis. The techno-functional analysis was based on Boëda [203] and as applied by several others [204–209], which highlights the value of this approach when understanding stone tools with limited removals (e.g. pebble/cobble tools) or very short reduction

**Table 2. Metric data (minimal, mean, maximal for length, width and thickness in centimeters) for each techno-typological category, per layer.** Standard deviation is provided for all layers.

|                                       |    | Layer 1 |           |      | Layer 2 |           |      | Layer 3 |           |      | Layer 4 |           |      | All layers |      |
|---------------------------------------|----|---------|-----------|------|---------|-----------|------|---------|-----------|------|---------|-----------|------|------------|------|
|                                       |    | Min.    | $\bar{X}$ | Max. | Min.    | $\bar{X}$ | Max. | Min.    | $\bar{X}$ | Max. | Min.    | $\bar{X}$ | Max. | $\bar{X}$  | s.d. |
| Flakes                                | L. | 1.0     | 3.59      | 11.4 | 1.1     | 3.52      | 10.5 | 0.6     | 3.81      | 10.5 | 1.0     | 3.97      | 10.5 | 3.72       | 1.62 |
|                                       | w. | 0.5     | 3.13      | 14.1 | 1.0     | 3.03      | 11.4 | 1.0     | 3.31      | 10.6 | 1.0     | 3.43      | 10.6 | 3.21       | 1.44 |
|                                       | t. | 0.4     | 1.20      | 5.4  | 0.2     | 1.29      | 7.1  | 0.3     | 1.34      | 5.2  | 0.3     | 1.45      | 5.3  | 1.34       | 0.81 |
| Cores                                 | L. | 2.3     | 6.60      | 14.4 | 2.2     | 5.85      | 11.0 | 3.5     | 6.45      | 11.2 | 3.0     | 7.53      | 17.1 | 6.79       | 2.41 |
|                                       | w. | 3.3     | 6.89      | 15.4 | 1.7     | 5.70      | 12.7 | 2.9     | 5.80      | 11.9 | 2.6     | 8.25      | 13.4 | 7.01       | 2.80 |
|                                       | t. | 1.9     | 5.48      | 10.4 | 1.6     | 4.41      | 9.6  | 1.6     | 4.64      | 10.5 | 1.4     | 7.24      | 16.4 | 5.76       | 2.78 |
| Shaped tools (unifacial and bifacial) | L. | 10.1    | 12.85     | 18.1 | 6.4     | 9.14      | 10.6 | 6.9     | 9.67      | 16.0 | 5.6     | 10.10     | 16.9 | 10.11      | 3.27 |
|                                       | w. | 7.0     | 7.80      | 8.3  | 4.7     | 5.27      | 6.6  | 4.7     | 6.30      | 8.2  | 4.4     | 6.71      | 8.9  | 6.77       | 1.43 |
|                                       | t. | 3.0     | 4.50      | 6.3  | 2.2     | 4.30      | 5.5  | 3.3     | 4.42      | 6.5  | 2.4     | 4.02      | 5.4  | 4.21       | 1.04 |
| Pebble/cobble tools                   | L. | 3.0     | 6.50      | 10.9 | 2.6     | 5.88      | 11.0 | 2.9     | 6.94      | 12.2 | 3.2     | 6.93      | 13.6 | 6.82       | 2.50 |
|                                       | w. | 3.0     | 6.73      | 10.6 | 2.7     | 5.50      | 10.0 | 2.8     | 6.61      | 11.1 | 3.5     | 6.84      | 13.9 | 6.70       | 2.32 |
|                                       | t. | 1.6     | 4.04      | 7.5  | 1.9     | 3.80      | 5.5  | 1.5     | 4.58      | 8.7  | 1.9     | 4.52      | 8.5  | 4.38       | 1.48 |
| Unmodified tools                      | L. | 9.8     | -         | -    | 5.8     | 6.05      | 6.3  | -       | -         | -    | 7.2     | 10.10     | 16.1 | 9.98       | 2.99 |
|                                       | w. | 9.5     | -         | -    | 4.4     | 4.85      | 5.3  | -       | -         | -    | 5.6     | 8.62      | 11.2 | 8.15       | 2.18 |
|                                       | t. | 9.0     | -         | -    | 2.7     | 2.90      | 3.1  | -       | -         | -    | 4.9     | 7.62      | 10.4 | 6.57       | 2.29 |
| Polyhedra (multifacial shaping)       | L. | 5.6     | 8.10      | 11.7 | 2.2     | 4.06      | 6.0  | 5.4     | 6.15      | 6.9  | 5.0     | 7.42      | 8.8  | 6.94       | 2.18 |
|                                       | w. | 4.5     | 6.80      | 11.1 | 2.4     | 3.70      | 4.9  | 5.2     | 5.90      | 6.6  | 3.6     | 6.90      | 8.0  | 6.05       | 2.21 |
|                                       | t. | 3.6     | 6.17      | 11.1 | 2.4     | 3.70      | 4.9  | 4.6     | 5.00      | 5.4  | 3.0     | 6.08      | 7.5  | 5.55       | 2.27 |
| Tested pebbles/cobbles                | L. | 3.8     | 9.53      | 15.6 | 4.2     | 7.53      | 18.0 | 3.9     | 10.01     | 23.6 | 4.0     | 10.01     | 25.8 | 8.96       | 3.32 |
|                                       | w. | 4.1     | 8.43      | 10.2 | 3.5     | 5.88      | 10.6 | 3.0     | 8.24      | 20.8 | 3.4     | 8.24      | 19.7 | 7.27       | 2.71 |
|                                       | t. | 3.4     | 6.78      | 9.6  | 2.1     | 4.32      | 10.5 | 3.5     | 6.81      | 16.0 | 1.7     | 6.35      | 18.1 | 5.63       | 2.48 |
| Undetermined                          | L. | 2.2     | 3.50      | 5.7  | 1.5     | 3.30      | 7.0  | 2.2     | 3.73      | 6.9  | 1.2     | 3.96      | 11.0 | 3.77       | 2.19 |
|                                       | w. | 1.5     | 2.60      | 4.3  | 0.5     | 2.21      | 4.3  | 1.3     | 2.87      | 4.6  | 1.0     | 2.81      | 5.4  | 2.64       | 1.47 |
|                                       | t. | 0.7     | 1.98      | 4.2  | 0.2     | 1.46      | 4.2  | 1.0     | 1.75      | 2.4  | 0.4     | 1.95      | 4.2  | 1.79       | 1.24 |

<https://doi.org/10.1371/journal.pone.0278775.t002>

sequences [210–214]. This approach is also useful when analyzing complex shaped tools [215–218]. The approach includes an evaluation of technological determinism inherent in each object, meaning, what can be achieved mechanically with the object. It is evaluated using volumetric patterns (e.g. the weight, overall shape, cross section morphology or the way the volume is distributed across the object) and the location of the cutting edges, the pointed tips or percussive surfaces. Both volumetric patterns and the location of active parts are believed to have an influence on the prehensile part to the artifact. Specific focus is put on the cutting edges to identify where, along the cutting edge, the morphology is changing (e.g. from a sinuous delineation to rectilinear delineation). The study of these patterns usually results in a flexible classification highly adapted to each site's assemblage, but the approach makes inter-site comparisons more difficult. In this paper, we describe the tool categories using only the following techno-functional descriptive patterns:

- orientation of cutting edges in relation to the tool blank volume (tool blank volume is considered here as the “*Unité Techno-Fonctionnelle transmettrice*”: *UTFt*): distal, disto-lateral, lateral, proximal regarding the longitudinal axis.
- technology and morphology of potential prehensile parts (“*Unité Techno-Fonctionnelle prehensile*”: *UTFp*): for examples, cortical convex surface or a lateral back (see definition in [216]).

- technology and morphology of potentially active parts (“*Unité Techno-Fonctionnelle active*”: *UTFa*): angle value of cutting edges ( $\pm 2.5^\circ$ ); morphology of cutting edges and points (delineation and cross-section).

This methodology is based on the idea that the three parts act simultaneously in tool use: *UTFa* is activated thanks to *UTFp* and a great role is played by the overall size, weight and morphology of *UTFt* for the “*functionality*” of the tool. In the techno-functional approach, “*functionality*” is different from “*function*” because the former refers to all the ways a tool can be used, whereas “*function*” refers to the specific use of an artifact that can only truly be known when applying use-wear analysis. All these recorded data are considered in light of the reduction sequence that the tools were created by. Consequently, with this approach, stone tools which have been manufactured in different ways may present similar “*functional potentials*”. This means that due to similarities in volumetric configurations, different tools may be used in similar ways.

### Inter-site morphometric comparisons

A supplementary corpus was also created for comparative purposes. It comprises the basic metrics (length, maximal width, and maximal thickness) of shaped tools measured by the authors, along with summarized bibliographic data from several contemporary or sub-contemporary coastal ESA sites from southern Africa. It includes shaped tools, mainly LCTs (>10cm) from Elandsfontein and Cape Hangklip (data from the online database of [207]), and artifacts from Penhill Farm, Namib IV and Gembok, also measured by the authors. Information regarding the sites and measurements are provided in Table 3 and S2 Table, and site locations are illustrated in Fig 1. In this paper, we also provide a traditional morphometric comparison of bifacial/unifacial shaped tools between these sites to compare differences in their shape. The basic metrics have been used to calculate the following indices for comparison: elongation (Length/width), fineness indice 1 (Length/maximal thickness) and fineness indice 2 (maximal width/maximal thickness). Differences between raw measurements and the indices are explored using ANOVA (ANalysis Of VAriance) and Tukey HSD Tests, where p-values >0.05 were considered significant (see similar application and detailed methodology described by [162, 208]). All the analyses were conducted using R Studio, version 1.4.1106

**Table 3. Details and bibliography used for the lithic collections from Middle Pleistocene transition Earlier Stone Age sites from the southern African coastal plain: Namib IV, Gembok, Elandsfontein, Cape Hangklip and Penhill Farm.**

| Site name                                | Location                   | Number of artifacts | Number of LCTs considered in this study | Storage location           | Age        | Dating method                             | Context                                                    | Main references          |
|------------------------------------------|----------------------------|---------------------|-----------------------------------------|----------------------------|------------|-------------------------------------------|------------------------------------------------------------|--------------------------|
| Namib IV                                 | Central Namib, Namibia     | 396                 | 9                                       | National Museum of Namibia | 400–700 ka | Biochronology and ESR                     | Deflated surface sand dune surface                         | [182, 212–214]           |
| Gembok                                   | Sperrgebiet, Namibia       | 1166                | 111                                     | National Museum of Namibia | 400–800 ka | Geology, biochronology and typochronology | Mining trenches within raised beach                        | [59, 61, 215, 216]       |
| Elandsfontein (use of ‘Cutting 10’ data) | Western Cape, South Africa | -                   | 286                                     | Iziko Museum               | >780 ka    | Paleomagnetism and biochronology          | Excavation and surface within paleo-sand dunes             | [57, 58, 207, 217–223]   |
| Cape Hangklip                            | Western Cape, South Africa | -                   | 268                                     | Iziko Museum               | 400–700 ka | Geology and typochronology                | Excavation and surface within raised beach                 | [116, 117, 207, 224–227] |
| Penhill Farm                             | Eastern Cape, South Africa | 9904                | 42                                      | Witwatersrand University   | <1.37 Ma   | $^{10}\text{Be}/^{26}\text{Al}$           | Colluvial debris flow contained within an alluvial terrace | [66, 162, 228–236]       |

<https://doi.org/10.1371/journal.pone.0278775.t003>

[224]. The primary aim of this inter-site comparison is to provide some insight on the differences and similarities between ESA coastal sites contemporary with the MPT in southern Africa. However, due to varying methods of technological analyses for the lithic collections [225, 228], the quantitative approach was favored for this study. We consider it to be the most efficient as it provides standardized length, width and thickness data for shaped tools, irrespective of the different lithic approaches. In contrast, comparing the reduction strategies of retouched flakes is harder due to the varying ways of reading artifacts and classifying them.

## Results

### Raw material distributions

Raw material distributions exhibit quartz-based lithic production for all techno-typological categories (Table 4). Only the non-knapped percussive tools present an important component of volcanic rocks [169], and the shaped tools present a more diverse suite of raw materials. We distinguish hyaline quartz, which is much more homogeneous in structure, from the broad quartz category, among which are classified 'saccharoid' and 'milky' quartz types [237–239].

### Refits and state of preservation

We refitted 188 individual artifacts that constituted 47 refit units. These included: cores and associated flakes ( $n = 6$ ), two to 16 flakes without core ( $n = 36$ ), tested cobble and first flake ( $n = 3$ ), and naturally fragmented cobbles ( $n = 2$ ). These refits were also used to describe the reduction strategies in the following section. Refitted artifacts were plotted on an orthonormal plan and several refits showed important concentrations (Fig 5), which suggested the knapping process occurred *in situ* with minor post-depositional disturbance.

However, the breakage rate is important and especially for flakes ( $n = 657$ ), whereas cores ( $n = 4$ ) or pebble/cobble tools ( $n = 3$ ) are rarely fractured. This may be due to quartz breaking during knapping but also to trampling on-site during actual herders' transhumance, which may have affected the finest pieces of the deposit. Indeed, we distinguished fractures which occurred during knapping, such as "Siret accident" with a fracture plan associated to the impact point of the ventral surface ( $n = 29$ ), from pieces with two or more fractures ( $n = 66$ ). We note that flakes present a transversal break ( $n = 295$ ) or a longitudinal or sub-longitudinal breakage ( $n = 267$ ). Another supporting observation for minimal assemblage disturbance is the overall freshness of the lithic arrises and cutting edges.

**Table 4. Raw material distribution per techno-typological category of Dungo IV.**

|                       | Quartz | Hyaline quartz | Quartzite | Chert | Volcanic | Undetermined | Sandstone | Total |
|-----------------------|--------|----------------|-----------|-------|----------|--------------|-----------|-------|
| Unretouched flakes    | 1225   | 448            | 141       | 88    | 32       | 7            | 9         | 1950  |
| Cores                 | 119    | 17             | 13        | 10    | 9        | 2            | 4         | 174   |
| Tested cobble/pebbles | 88     | 5              | 6         | 2     | 9        | 10           | 2         | 122   |
| Pebble/cobble tools   | 74     | 8              | 11        | 6     | 9        | 2            | 3         | 113   |
| Undetermined          | 49     | 17             | 4         | 5     | -        | 3            | -         | 78    |
| Retouched flakes      | 48     | 16             | 8         | 5     | 1        | -            | 1         | 79    |
| Shaped tools          | 12     | -              | 4         | 6     | 1        | -            | -         | 23    |
| Polyhedra             | 18     | 1              | 2         | -     | -        | -            | -         | 21    |
| Non-knapped tools     | 6      | -              | -         | -     | 6        | -            | -         | 12    |
| Total                 | 1639   | 512            | 189       | 122   | 67       | 24           | 19        | 2572  |
| %                     | 63.8   | 19.9           | 7.3       | 4.8   | 2.6      | 0.9          | 0.7       | 100.0 |

<https://doi.org/10.1371/journal.pone.0278775.t004>



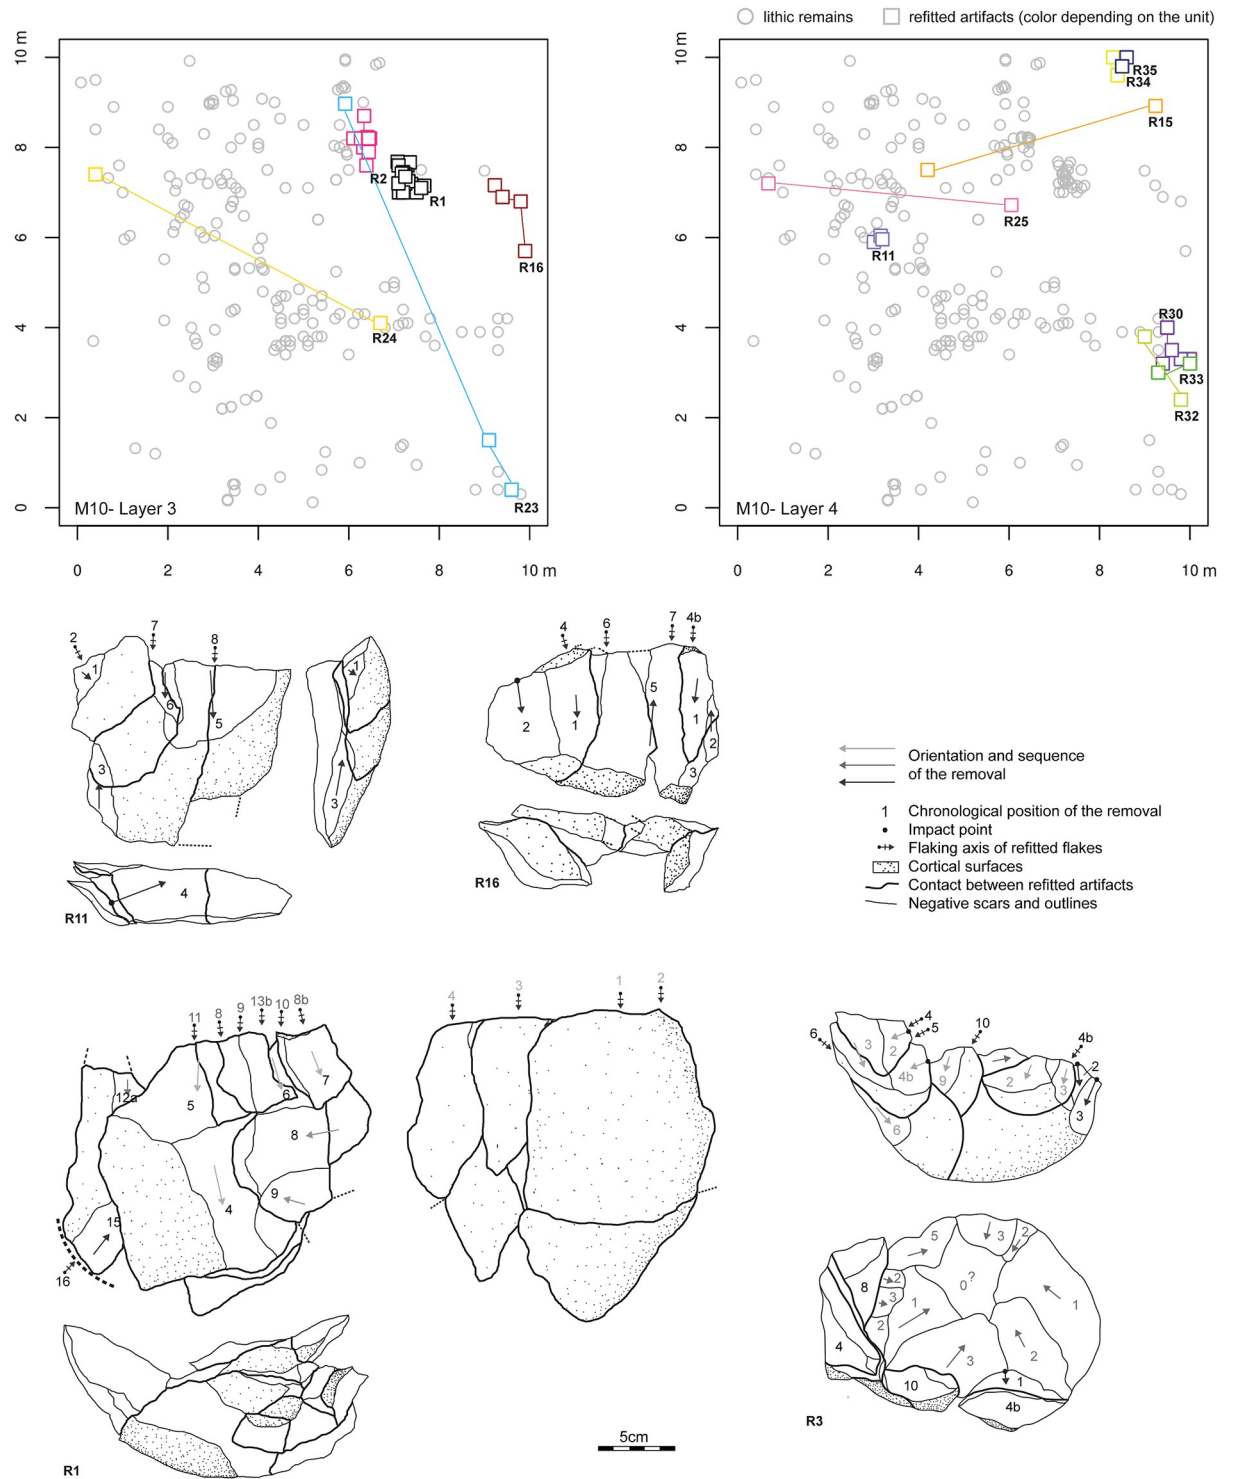

**Fig 5. Lithic refit units R1, R3, R11 and R16 and planimetric mapping of the refittings of the sector M10 Layer 3 and Layer 4.**

<https://doi.org/10.1371/journal.pone.0278775.g005>

## Core reduction strategies

Here, we describe the four main reduction strategies that collectively account for 153 cores—87.9% of the total core sample (Fig 6). The rest of the assemblage ( $n = 21$ ) presents multidirectional informal cores. Their irregularity both in reduction sequence and morphology do not facilitate their inclusion in any relevant technological group.

The main reduction strategy was identified based on 104 cores (Fig 7A and 7F). It uses a single flat striking surface to produce quadrangular or elongated flakes via recurrent unidirectional removals. When the flake is detached from the lateral extremity of the flaking surface, knappers may obtain flakes with a cortical lateral back also called a “*débordant*” flake. All the products seem to be smaller than 10 cm and only two cores present one large flake negative ( $>10$  cm based on [114, 240]). It also seems that these cores were exploited via short reduction sequences barely exploiting more than two contiguous surfaces. We observed an important trend in the use of rolled quartz blocks, rather than cobbles and/or pebbles, which may be related to the intention of exploiting flatter and angular cortical surfaces—the cortical surface of cobbles and pebbles being more rounded. These blocks are rarely encountered in the pebble and cobble outcrops, but on the contrary we did observe these blocks in the current Dungo IV site in the uppermost part of the river bed.

The unifacial centripetal reduction strategy ( $n = 28$ ) (Fig 7B) is the second most common strategy. Blanks are predominantly produced using the split technique, across the longitudinal or transversal axis of a pebble [205, 241]. Alternatively, the first flake obtained from a knapped pebble/cobble could also serve as a suitable blank. The cortical surface is used as a convex striking surface to exploit the opposite surface. The removals may vary from short flakes to more elongated flakes depending on the flaking surface convexities, the depth of the striking platform and the overlapping of the removals. However, they will always present a cortical convex butt which accounts for the main thickness of the flake. The dorsal surface will be plain and convex (ventral surface of the core’s flake blank) or will present convergent to centripetal removals. This strategy seems to produce only small flakes ( $<5$  cm).

The bifacial alternate flaking with centripetal modality ( $n = 9$ ) is the third most common (Fig 7C). This strategy groups both the SSDA cores (“*Système de Surfaces de Débitage Alternées*” or “alternated flaking surfaces system”) [196] and discoidal *sensu lato* cores [242, 243].

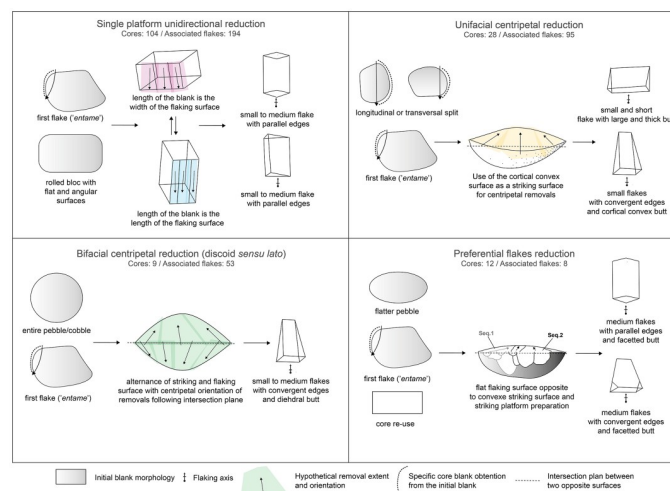

**Fig 6. Sketches of the four main flake production strategies at Dungo IV and the techno-morphological patterns of the resulting flakes.**

<https://doi.org/10.1371/journal.pone.0278775.g006>

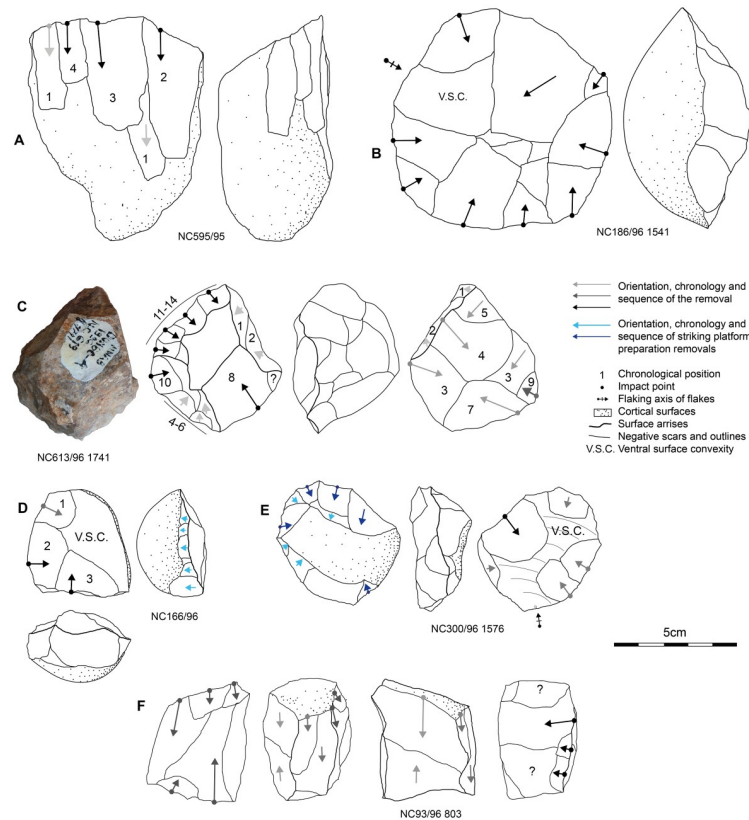

**Fig 7. Cores from Dungo IV.** A, B, D, E, F are quartz while C is chert.

<https://doi.org/10.1371/journal.pone.0278775.g007>

SSDA cores are characterized by an alternance between flaking/striking from two opposite surfaces, which will help with recurrent flake production thanks to  $<90^\circ$  angle maintenance. It is interesting to note that in this group, siliceous rocks are well-represented in the assemblage and when the blank is visible it represents small blocks unidentified in the vicinities of the site [169]. Small blocks of siliceous rocks may come from the primary deposit encountered at the foot of the End Rift Conformity 20 km inland [170, 244]. However, the initial blanks are mostly indeterminate as these are the most reduced cores and we can see up to four flaking sequences each with several removals. The alternating system or SSDA also allows for long continuous sequences of removals due to the automatic maintenance of favorable angles between the two opposite surfaces and which can lead to discoidal core organization. A typical flake of this production type presents convergent edges with convergent to centripetal dorsal patterns, and a plain or dihedral butt.

Finally, we identified several cores ( $n = 12$ ) which present a similar volumetric configuration: two opposite asymmetrical surfaces. The flatter surface is used as a flaking surface and the more convex surface serves as the striking surface to obtain a thin flake with a linear peripheral cutting edge. The striking platform is systematically prepared by small removals (Fig 7D and 7E). These prepared cores refer to a hierarchized reduction strategy [185, 245]. The variability is contained in the blank production and preparation. Knappers used both the natural and initial blank volumetric patterns when convexities were suitable for this strategy, or they re-used a core already exploited via another strategy. Consequently, dorsal patterns and outline morphology of the flake are highly variable but the butt always presents the stigmata of striking

platform preparation. Indeed, one can consider these cores (n = 12) as partially prepared cores to obtain a preferential flake.

### Techno-typological flake patterns

Relying only on the entire flake assemblage and its techno-typological attributes, we observe consistency with the core assemblage described above (Fig 8).

Due to the poor core preparation and the use of whole gravels, we used Toth's cortical flake classification ([246] which provides the reduction sequence position of flakes thanks to cortical residual surfaces (across both platforms and dorsal surfaces). We observe a high predominance of flakes presenting both cortical butts and cortical dorsal surfaces (n = 933) and flakes presenting a non-cortical butt associated with a dorsal cortical surface (n = 366). Only 658 flakes show a total absence of cortical surfaces. This fact, along with the importance of cortical or partially cortical butts, confirms the use of entire gravels as blanks and the frequent use of cortical striking surfaces coupled with a scarcity of flaking surface preparation.

When readable, the dorsal scars present mainly uni- or bi-directional orientations (n = 910), orthogonal (n = 214) and multidirectional (n = 170). The scarcity of convergent (n = 88) and centripetal (n = 49) scars is surprising, particularly given the presence of reduction strategies in the core sample that would facilitate such flakes (i.e., discoidal). This scarcity can likely be explained by the poorly overlapping removals we observed in unifacial centripetal reduction schemes, and the shortness of reduction sequences. Overall, the flake assemblage provides evidence that is consistent with the dominance of a single platform unidirectional

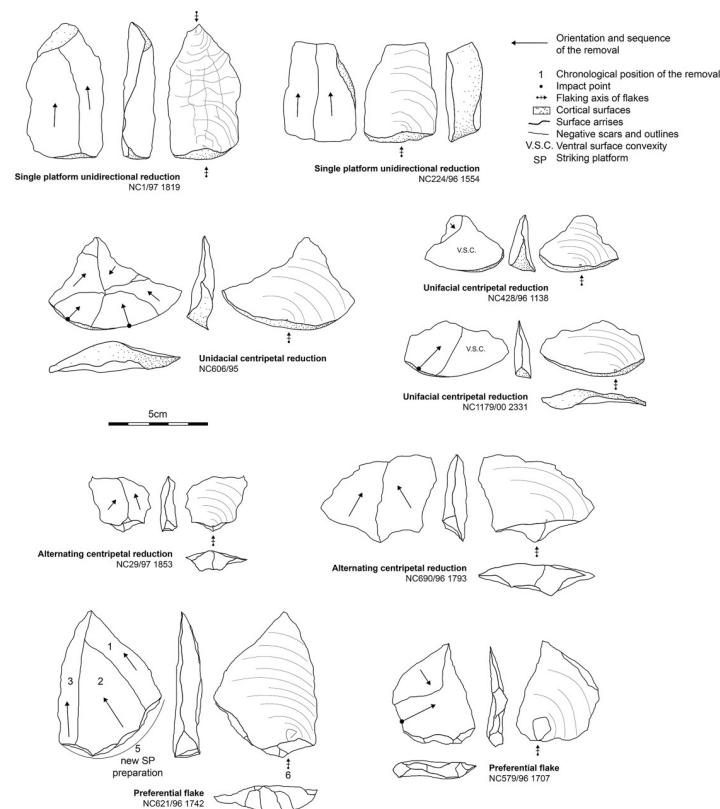

**Fig 8. Quartz flakes from Dungo IV and their association with specific core reduction strategies.**

<https://doi.org/10.1371/journal.pone.0278775.g008>

flaking strategy as exhibited by the cores. Focusing on the butt types, we observed a predominance for entirely cortical butts ( $n = 890$ ), followed by plain flat butts ( $n = 775$ ), but faceted ( $n = 18$ ) or dihedral ( $n = 111$ ) butts are rarer.

Regarding the overall morphological patterns of the flake assemblage, we observed a primary trend for producing small flakes ( $<5$  cm), and only 58 flakes present lengths greater than 7.5 cm, among which nine present lengths between 10 and 14 cm; only two flakes present widths between 10 and 13 cm. This scarcity of large flakes echoes the core metrics and the flake scar negatives on the cores. In addition, we also identified only two cores that presented the removal of large flakes and both belong to the single platform unidirectional reduction strategy.

## Flake tools

The 79 retouched flakes are predominated by quartz artifacts retouched in highly variable ways, measuring between 2.7 and 11.5 cm with a mean morphological length of 5.4 cm. Long retouch removals predominate and among them we observe a higher frequency of abrupt removals compared to low-angle retouch (Table 5). Unifacial retouch is most common and mixed retouch (meaning a retouched area presents unifacial retouch along with a few bifacial retouch removals as well) is also frequent. These tools are primarily retouched on the cutting edges (rectilinear = 30; convex = 25; concave = 5), but also on pointed extremities ( $n = 11$ ) or denticulated edges ( $n = 13$ ). We observed only one retouch sequence along a tool edge, suggesting the absence or general rarity of cutting-edge re-sharpening—the latter usually being identified by several generations of retouch. Generally, the retouched area can extend inwards along the edge from 1.5 to 5.5 cm. Trends related to artifact size, where LCTs are almost absent (3 artifacts are over 10cm long), illustrate the small to medium-size range of retouched flakes from Dungo IV. In addition, no flake tool exhibits percussive or macro-wear damage/modification, pointing toward a light tool component for retouched flakes.

Among the 79 artifacts, we note that plano-convex tools ( $n = 29$ ) and those presenting a lateral surface or lateral flat/back ( $n = 25$ ) are well-represented.

Plano-convex flake tool blanks are mainly cortical and so, have been obtained during early reduction sequences ( $n = 25$ ). These cortical blanks are primarily obtained through the transversal split technique, and the use of this technique for the production of short plano-convex cortical blanks exemplifies the optimization of the natural cortical convexities of small quartz pebbles (Fig 9B). Other plano-convex tools ( $n = 4$ ) obtained their plano-convex structure due to retouching. These tools primarily present a convex to rectilinear abruptly retouched cutting

**Table 5. Distribution of retouch types (location, extent and orientation) at Dungo IV.**

| Retouch type |           | Mixed | Bifacial | Dorsal | Ventral | Total |
|--------------|-----------|-------|----------|--------|---------|-------|
| Mixed        | Abrupt    | 4     | -        | -      | -       | 4     |
|              | Low-angle | 2     | -        | -      | -       | 2     |
| Short        | Mixed     | 5     | 3        | 2      | -       | 10    |
|              | Abrupt    | -     | 4        | 9      | -       | 13    |
|              | Low-angle | -     | 3        | 1      | -       | 4     |
| Long         | Mixed     | 3     | 1        | -      | -       | 4     |
|              | Abrupt    | -     | 6        | 16     | 3       | 25    |
|              | Low-angle | -     | 4        | 4      | 5       | 13    |
| Notch        | Abrupt    | -     | -        | 2      | 2       | 4     |
| Total        |           | 14    | 21       | 34     | 10      | 79    |

<https://doi.org/10.1371/journal.pone.0278775.t005>



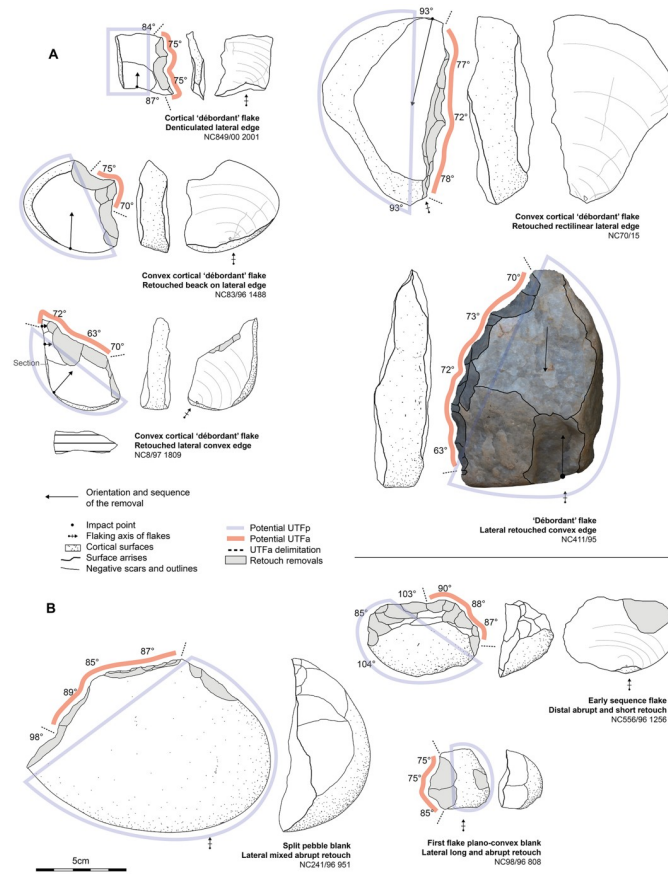

**Fig 9. Examples of flake tools from Dungo IV.** A: retouched flakes with lateral back interpreted as potentially prehensile part opposite to various retouched edges. B: plano-convex cortical flake blanks with abrupt retouch.

<https://doi.org/10.1371/journal.pone.0278775.g009>

edge, varying in angle from 70° to 95°. It suggests an association between small to medium (3 to 8cm long) tool size and an overall robust structure, coupled with particularly thick cutting edges. This robust structure is due to the lithic mass being concentrated on the mesial dorsal part of the tool (within the convexity of the superior surface which act as a “mass reserve”).

Flake tools with a lateral back are obtained or modified through retouch, (n = 4) or through the initial production of ‘débordant’ flakes (n = 10), or from short flakes with a large and wide butt (n = 6) (Fig 9A). These are usually characterized by lateral or disto-lateral cutting or piercing type tools opposite to the lateral surface. Indeed, this lateral surface has been interpreted as a potential prehensile part—or at least, a surface which may facilitate the handling of the flake. Most of the time, this lateral surface accounts for the morphological length of the tool and varies from 2.7 to 11.4 cm—the flake tools >10 cm also have this lateral surface.

### Cobble/pebble tools

We distinguish pebbles (4–64 mm) from cobbles (64–256 mm) based on Wentworth’ scale [247]. At Dungo IV, pebbles occur more than cobbles for tool production and even though larger clasts are available, this trend seems to mimic the raw material properties in the local landscape [169]. Raw materials are primarily quartz, followed by quartzite and volcanic rocks (Table 4), and pebble/cobble tools numerically account for the main part of the toolkit. These have been interpreted as tools due to the presence of a homogeneous cutting edge (no

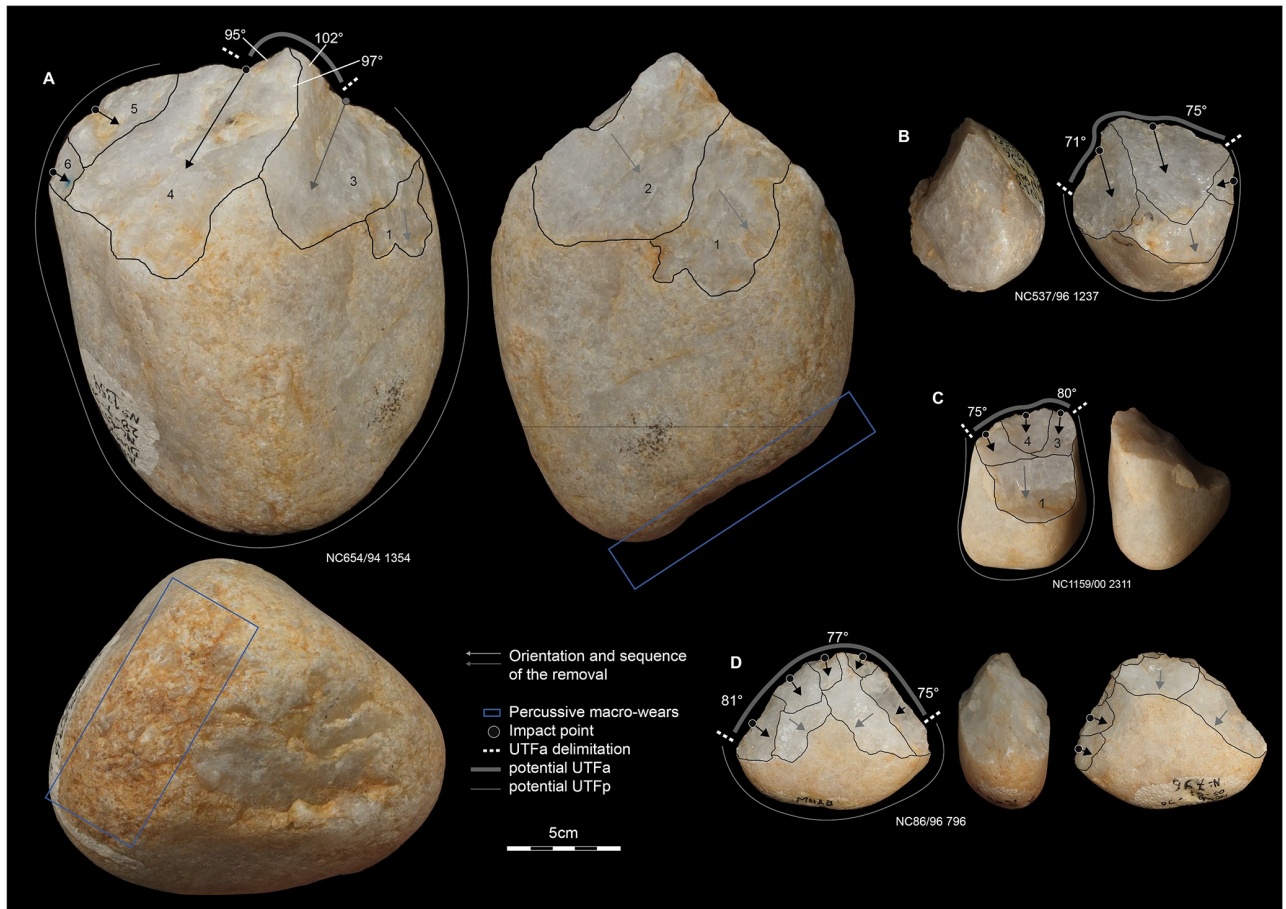

**Fig 10. Examples of pebble/cobble tools from Dungo IV.** A is a pick on a cobble presenting macro-wear patterns on the proximo-lateral cortical surface. B and C are micro-choppers whereas D is a micro-chopping-tool.

<https://doi.org/10.1371/journal.pone.0278775.g010>

sinuosity of the edge which would have to refer to SSDA flake extraction) associated with a series of removals (>2 removals) that intend to shape a cutting edge or a pointed extremity.

Most of them have been shaped distally or laterally using one to two generations of removals, either uniface or bifacial [169]. This method creates a cutting edge from rounded blanks with variable angle values, ranging from 60 to 120° (mean = 88.4°; s.d. = 13.4). This reflects diversity in both cutting edge morphology and the distance between cutting edges and prehensile tool portions, but also suggests a trend toward robust (steeply-edged) cutting tools. These pebble/cobble tools are described and discussed in terms of lithology, morphometrics and technology in [169]. We present in this paper three specific patterns among this diversified cobble/pebble toolkit:

1. *Micro-chopper/chopping tools (Fig 10B–10D)* (n = 30): we consider here that producing <5 cm long tools on quartz pebbles is a characteristic feature of the assemblage. These tools only present linear, sinuous or convex cutting edges (with an absence of pointed tips). The mean angle of their cutting edges is <80° and consequently, thinner than the overall mean of cutting edges for the pebble/cobble tool component. The cutting edges of these *micro-pebble* tools may have been produced both by bifacial (chopping-tools) and uniface

removals (choppers). It proves the presence of a robust small tool component that associates naturally rounded and robust prehensile parts to a relatively thin cutting edge.

2. Cobble/pebble picks (Fig 10A) (n = 9): these mid-sized tools (5 to 10 cm long) are systematically obtained through trifacial distal shaping of a pebble with large removals, creating three adjacent surfaces. These three surfaces converge and create a distal pick trihedral to rhomboid in cross-section with robust angle values ranging from 80° to 100°. These present a higher length (mean = 7.37 cm; s.d. = 2.12) and maximal thickness (mean = 5.76; s.d. = 1.56) than the mean value of pebble/cobble tools (Table 2). This robust distal pointed part has been interpreted as the potentially active part and is associated with a robust proximal cortical rounded base which may have facilitated a powerful grip.
3. Distal platform cobble/pebble tools (n = 9): these too are mid-sized tools, presenting a distal surface obtained through centripetal removals that create a distal surface. The shaping plane is perpendicular or sub-perpendicular to the longitudinal axis of the blank and provides important angle values >90° for concavo-convex short cutting edges.

### Bifacial and unifacial shaping/reduction strategies

From a production perspective, we distinguish three different shaping strategies based on 20 bifacially and three unifacially shaped tools (n = 23). Here, we integrate all the shaped tools, among which LCTs and much smaller shaped tools are included, and document the following strategies (see Table 2 for metrics):

- Strategy 1 (n = 9): the removal sequences continuously take into consideration the entire periphery of the blank with a bifacial (n = 6) or unifacial (n = 3) modality. This shaping echoes the reduction strategy described by Chazan for Wonderwerk Cave (South Africa) when writing “[...]conceptually, the tools are treated as an integrated entity that is first shaped and then retouched” [248] or by ourselves regarding Namib IV [249]. The shaping always follows the bifacial intersection plane and is followed by two to three final retouch sequences for regularization of the edge delineation. Artifacts vary in raw material, length and width (from 6 to 18 cm and between 4,7 to 9 cm, respectively), and they are mainly plano-convex tools. Or, they have convergent distal edges suggesting important morphometric variability.
- Strategy 2 (n = 8): it consists of “modular shaping” [249]. This strategy is applied to different types of raw material, and initial blanks and metrics are variable. Each shaping sequence shows specifically the location on the blanks and aims to create or modify a specific volumetric pattern (e.g. a distal point, a lateral surface, a rectangular proximal part etc.). The sequences are distinguished by removal chronology and poor overlapping of the sequences (Fig 11). Flaking angles can influence the volumetric pattern of the final tool.
- Strategy 3 (n = 6): all artifacts are in quartz obtained from both cobbles (n = 3) and cortical flakes (n = 3). They present a marginal partial bifacial shaping sequence which appears short and discontinuous. These are only mid-sized tools (5 to 10 cm in length) and all present convergent distal edges. Overall, the final products of this strategy are largely homogenous. The strategy aims to only regularize the initial blanks while retaining some pre-existing volumetric patterns on the blanks, for a specific final objective (Fig 11A)—namely, mid-sized pointed and thin quartz tools.

Overall, these shaped tools (n = 213) present diverse raw materials comprising siliceous rocks (n = 8), quartz (n = 10), quartzite (n = 4) and volcanic rock (n = 1)—even though quartz

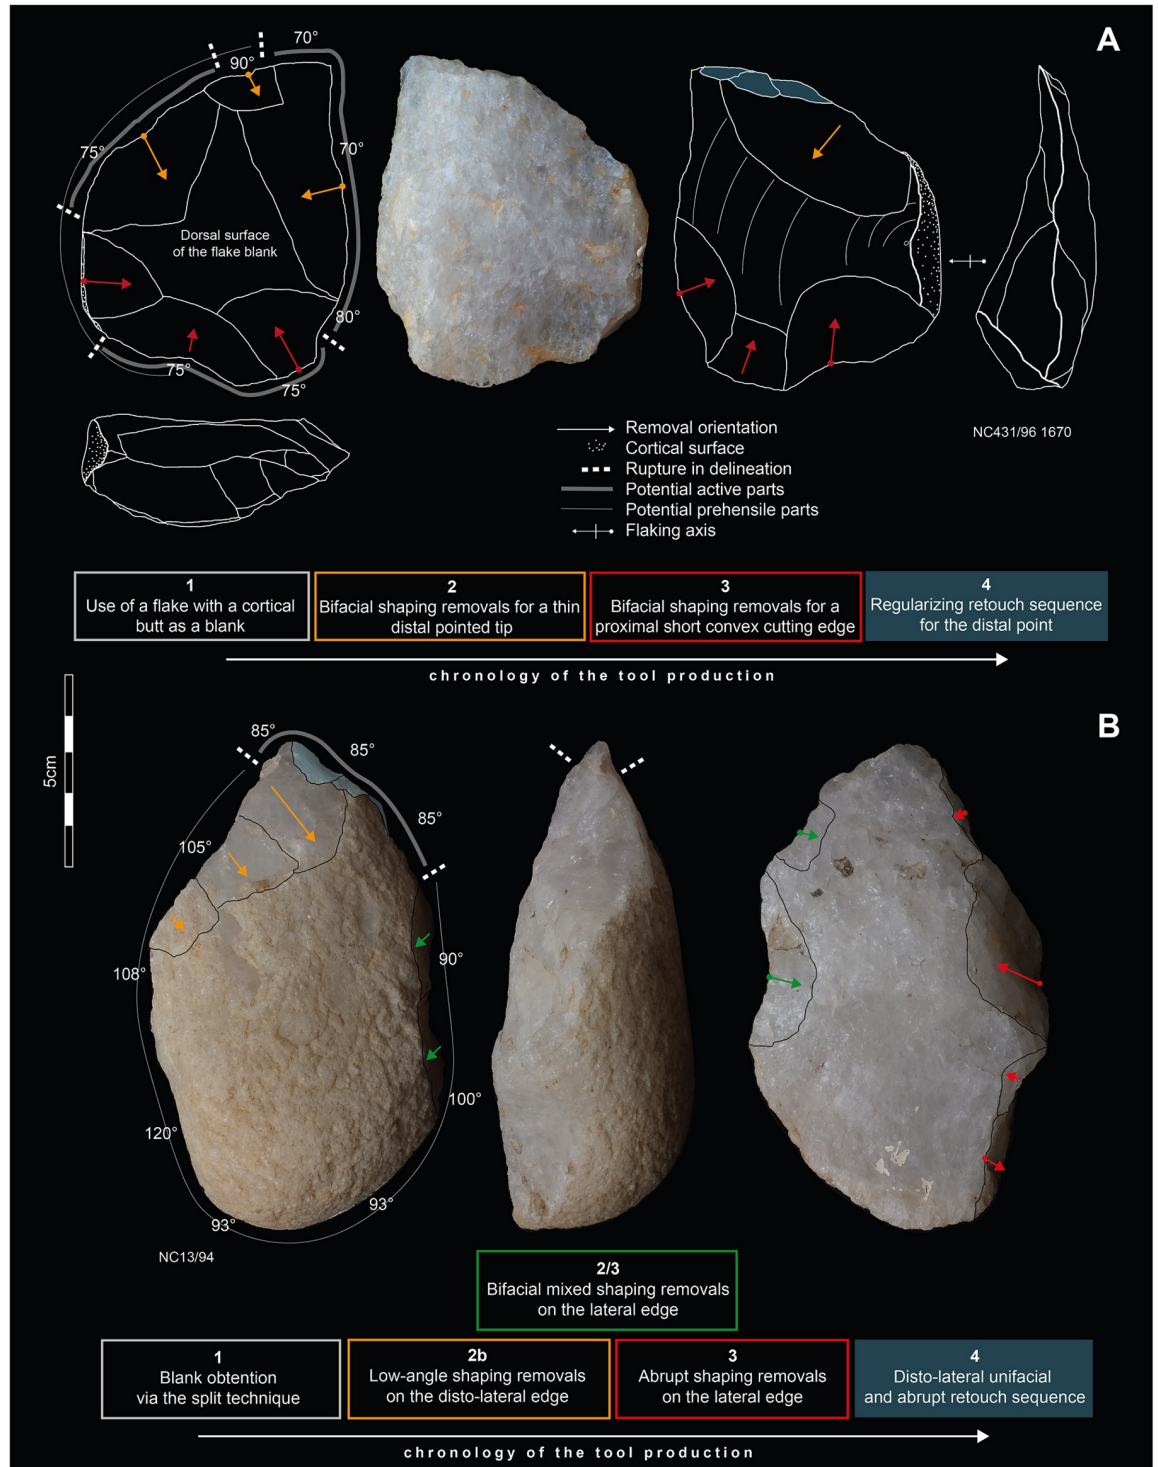

**Fig 11. Examples of shaped flakes from strategy number three (A) and a longitudinally split cobble from strategy number two (B).** The chronology of their production is explained under the photo, the colors of the box are related to the colors of the arrows or of the removals on the artifact.

<https://doi.org/10.1371/journal.pone.0278775.g011>



is particularly associated with strategy number three. Various blank types can be observed: cortical flakes ( $n = 7$ ), split pebble/cobbles ( $n = 2$ ), indeterminate flakes ( $n = 2$ ) or entire cobbles ( $n = 7$ ). These are also frequently retouched on up to three zones on the periphery. Raw material diversity is absent from the flake assemblage though they would have been easily identified, due to the predominance of quartz and refitting, and it may indicate the possible production of these tools outside of Dungo IV coupled with on-site discard behaviors.

### Multifacial tools

Multifacial shaped tools have been separated from bifacial or unifacial shaped tools due to their specific volumetric configuration resulting from multifacial shaping (Fig 12A). Numerically, these artifacts represent an important part of shaped tools ( $n = 21$ ) suggesting that multifacial shaping is as important as bifacial or unifacial shaping strategies for the knappers of Dungo IV. This volumetric configuration tends to be on mid-sized cubic to spheroid artifacts (Table 2) and is obtained through shaping using two generations of removals on an entire cobble or pebble. Typologically, it can be referred to as the “polyhedral, sub-spheroid and spheroid” tool types [193, 250]. First generation shaping tends to be multidirectional or orthogonal and provides the overall tool configuration thanks to a progressive opening of angles, whereas the second and final/ultimate generation creates a specific hemispheric crest by alternate removals (Fig 12A). This crest is always opposite to the remaining cortical surface. It presents angle values ranging from  $90$  to  $120^\circ$ , which are lower than the angles between other sub-surfaces that we could identify, and which range from  $120$  to  $140^\circ$ . Consequently, we interpret this crest as a potential UTFa—also based on previous studies [192]. On the contrary, the opposite remaining cortical surface is highly likely to have acted as a prehensile part for a powerful grip. Eleven of these tools present macro-use wear patterns described in the following sub-section. The recurrence of this multifacial shaping strategy, associated with redundant techno-functional features, suggests a consistent and well-established mental template referring to a specific macro-tool type.

### Percussive and crushing tools

Percussive wear patterns are present on 13.3% of the tools, which suggests that on-site percussive activities took place at Dungo IV. Percussive and crushing wear was identified on four types of blank: unmodified pebbles and cobbles ( $n = 17$ ) (Fig 13), on the cortical convex parts of modified pebbles and cobbles (cobble/pebble tools) ( $n = 17$ ), and on crests of polyhedra ( $n = 11$ ), or on the latero-proximal part of bifacial shaped tools ( $n = 2$ ). In total, 33 artifacts present macro-wear among which, 19 present a parallelepipedal to spherical morphology. We observed macro-wear primarily on crests or on cortical prominences ( $n = 14$ ), and on plane to slightly convex surfaces ( $n = 7$ ). The unmodified tool category comprises a set of cobbles and pebbles that retain macro-wear related to percussive or crushing activities. Regarding raw materials, magmatic rocks predominate and it has been argued that they have been specifically targeted for percussive activities while also representing some of the biggest tools for the entire assemblage [169].

### Dungo IV and the southern African coastal plain: A morphometric comparison of shaped tools

Studies comparing ESA shaped tools have shown that morphology is relevant when assessing regional inter-site differences [220, 251–255]. Consequently, here we provide supplementary data (see S2 Table) regarding bifacial and unifacial shaped tools from the previously mentioned five coastal plain sites of southern Africa, which chronologically span the Mid-Pleistocene

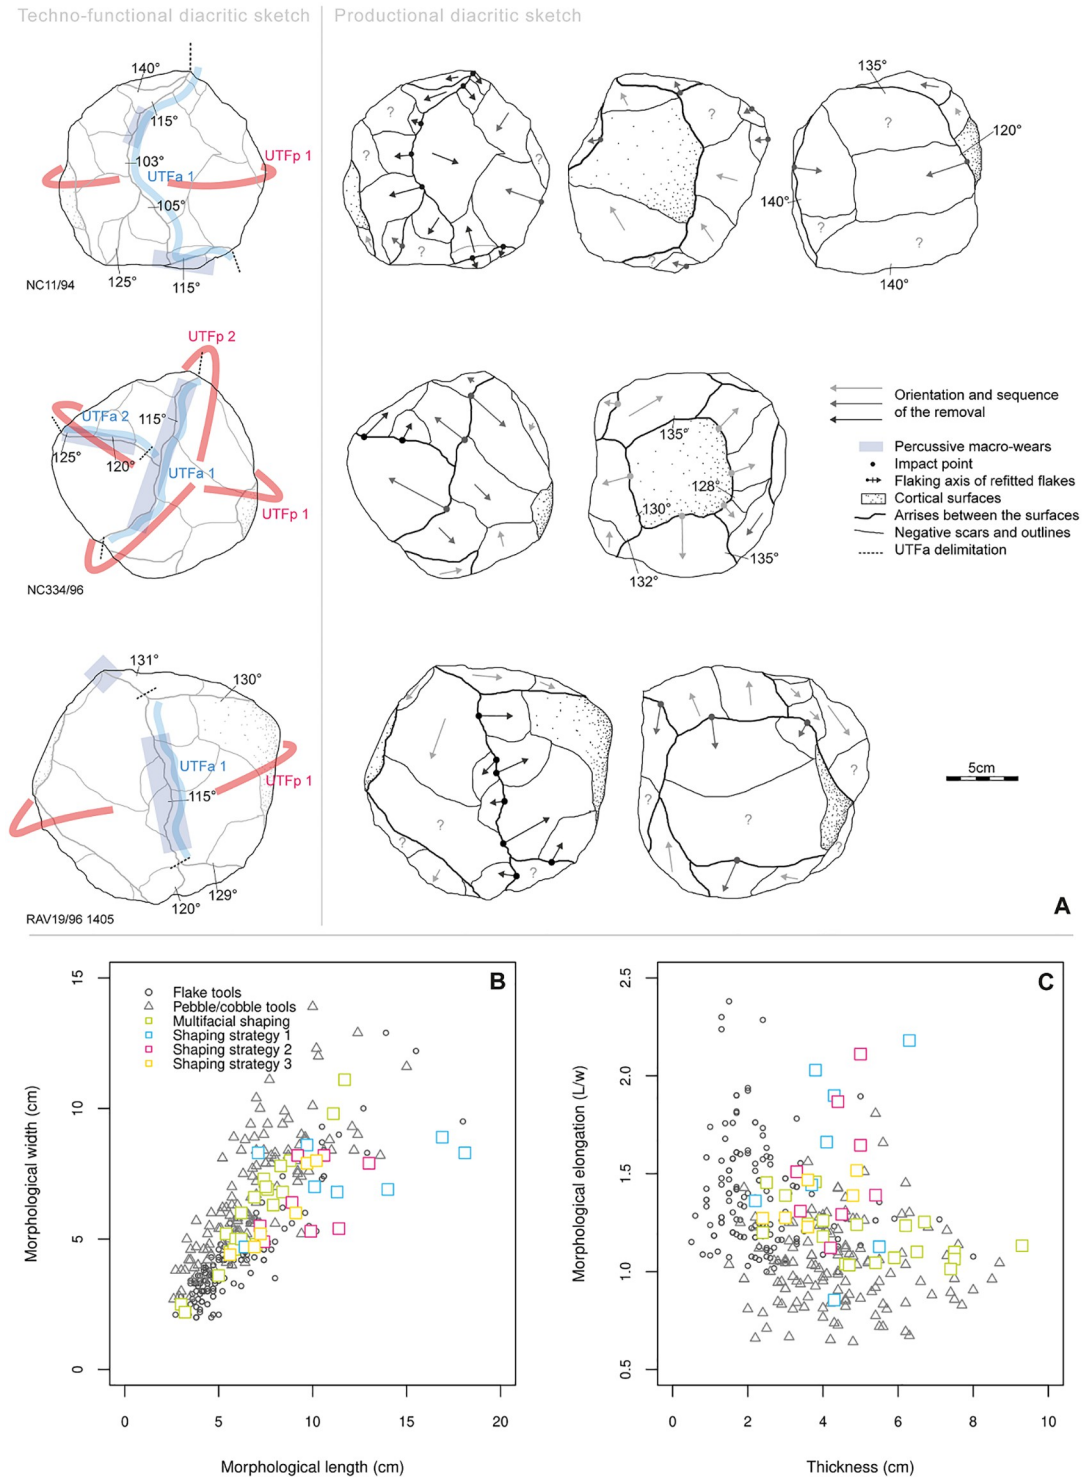

**Fig 12.** A: examples of polyhedra from Dungo IV showing the consistency between the production and techno-functional approaches. B and C are biplots of morphological length, width, thickness and elongation (Length/width) of the different tool techno-types.

<https://doi.org/10.1371/journal.pone.0278775.g012>

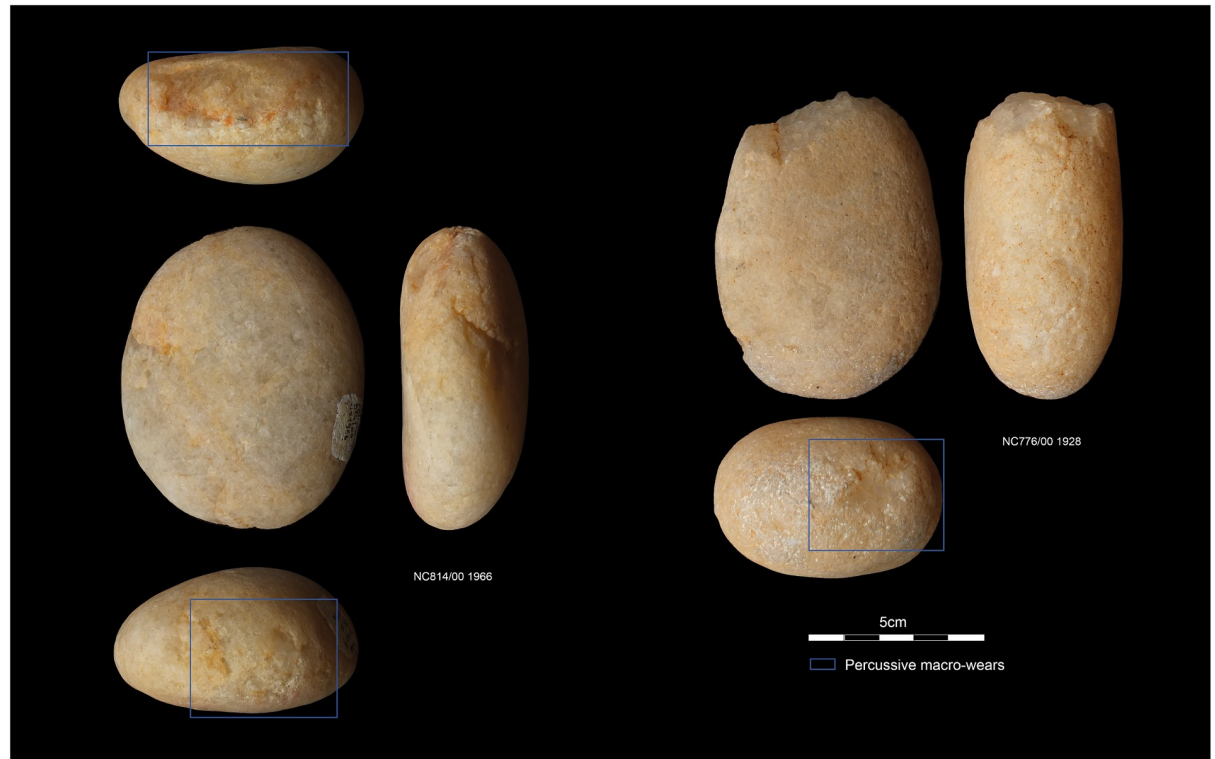

**Fig 13.** Examples of percussive macro-wear on quartz pebbles from Dungo IV.

<https://doi.org/10.1371/journal.pone.0278775.g013>

Transition (Fig 1 and Table 3): Cape Hangklip, Elandsfontein, Gembok, Namib IV and Penhill Farm. Metrics and indices are based on the methodology of [169, 220] and measurements were conducted by the authors, except for Cape Hangklip and Elandsfontein that were obtained from the online database of [219]. Comparative results are presented in bivariate plots (Fig 14). Tukey HSD tests were applied to check the significance of p-values ( $<0.05$ ) between the assemblages for each quantitative variable: length, width, thickness, elongation,

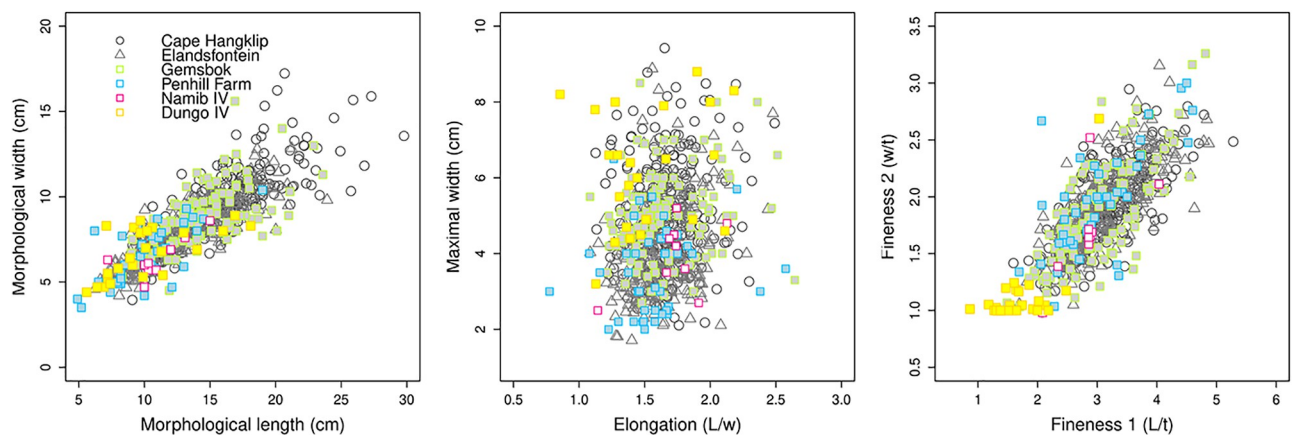

**Fig 14.** Comparative bivariate plots of morphometric patterns for the shaped tools from Cape Hangklip, Elandsfontein, Gembok, Penhill Farm, Namib IV and Dungo IV. Data are available in S3 Table.

<https://doi.org/10.1371/journal.pone.0278775.g014>

fineness indice 1 (Length/maximal thickness) and fineness indice 2 (maximal width/maximal thickness). From this, an important distinction is visible for the Dungo IV LCTs, by fineness indices 1 and 2. This distinction suggests that robust unifacial and bifacial shaped tools occur more frequently at Dungo IV when compared with the other southern African assemblages from the coastal plain. This is confirmed by significant p-values (See [S3 Table](#)) and it agrees with the technological observations described above. Overall lengths and widths are highly variable and mimic those trends observed at Penhill Farm and Namib IV. The diversity of reduction stages at Elandsfontein has been argued to be a major factor accounting for the morphometric variability of this assemblage [251]. At Dungo IV, several stages of reduction have been observed, yet the assemblage presents homogeneous fineness indices that suggest there was a well-established mental template.

## Discussion

In this paper, we propose that Dungo IV is a raw material procurement and knapping area, but also an area of multiple activities in a coastal zone. This is supported by numerous refits, the discard of used stone tools (with percussive wear patterns), the core and flake techno-typological characteristics and consistencies, and also, on-site raw material procurement with very few imports.

Regarding the core assemblage, most could be grouped into four categories and we can see specificities among each category, suggesting well-defined and separate “*chaînes opératoires*” for flaking strategies (e.g., different blank types, different core management strategies and varying objectives). Very few cores presented the stigmata that would indicate the application of several different strategies on the same blank. It is interesting to note the absence of SSDA flaking (alternant bifacial or orthogonal) and the scarcity of multidirectional cores, whereas the latter are well-represented among southern African ESA coastal sites such as at Gemsbok [60], Cape Hangklip [122], Penhill Farm [256] and Namib IV [249]. Despite the short reduction sequences which predominate at Dungo IV, we can argue that the flaking systems are not flexible and they are aligned to several specific mental templates. The primary trend is to produce small to medium flakes (<10 cm), whereas evidence for large flake production (>10 cm) has only been observed on two cores and two flakes, suggesting that such blank production was limited at Dungo IV. In this regard, we suggest these large flake blanks form only a very marginal part of the production system for the Dungo IV groups. In contrast, the importance of small to medium size *débordant* flakes, coupled with short flake production, seems to echo the retouched flake assemblage. The organization of a lateral surface opposite to a cutting edge appears to be well-suited for tool configuration, and they were likely anticipated during flake production by obtaining cortical lateral surfaces (short flakes and *débordant* flakes). In addition, the importance of cortical convexities is also a predominant feature in flake production and these products were used for retouch.

Regarding cobble/pebble tools, even though this component primarily exhibits a generalist production strategy (various shapes, sizes and types, and locations of cutting edges), several specific pebble tool implements described here indicate the presence of more specialized operational schemes. These concern macro-tools with a trihedral extremity, surface platform pebble tools, and micro-robust pebble tools (<5 cm in length). Among the shaped tools, we could identify highly variable bifacial and unifacial shaping strategies, but consistent morphometrics that indicate a trend for producing middle sized artifacts (5–10 cm). The multifacial shaping of macro-tools, that were possibly used for percussive or pounding activities, shows a different pattern where there is more standardized production giving rise to morphometric and techno-functional homogeneity. This suggests a more specialized operational scheme for producing spherical to cubic tools.



When comparing Dungo IV with the southern African coastal plain MPT ESA sites (see detailed bibliography in [Table 3](#)), we observed specific patterns in fineness indices, in addition to a higher frequency of more robust shaped tools at Dungo IV. All these sites indicate the use of pebble/cobble blanks for flaking and shaping, but also, for use in pebble tool configuration, while also exhibiting important components of bifacially shaped tools on large flakes. Typologically, large flakes, handaxes and cleavers (forming classic ESA Large Cutting Tools) have been reported among all these sites except at Dungo IV, where cleavers are absent and large flake (>10cm) production is sporadic. Despite the appearance of the pebble/cobble tools, the Dungo IV assemblage presents well-defined operational schemes characterized by specific yet diverse roles of pebble/cobble cortical convexities. We observed the role of the cortical convexities in:

- tools with a structure which relies on these natural convexities,
- recurrent and well-differentiated flaking strategies which exploit natural convexities in different ways,
- the retouch of cortical flake blanks,
- the shaping and retouch and pebbles and cobbles.

Variability is more evident in bifacial/unifacial shaping, cobble/pebble tools reduction and retouch types. In addition, we argue that several macro-tool categories are associated with specific production schemes which take advantage of pebble/cobble convexities: picks on cobbles, polyhedra, and thick, small plano-convex cortical flake tools. This can be related to the supply of beach quartz pebbles/cobbles in a landscape where other fine-grained raw materials are available, but are more rarely selected. Given the location of Dungo IV, on a coastal pebble/cobble outcrop, we propose that local populations specifically targeted these raw materials [[169](#)] as they were suitable for the toolkit they aimed to produce. Consequently, the lithic analysis results argue for an adaptation of several reduction strategies and tool types tied to the volumetric properties of beach pebbles and cobbles, and particularly for quartz.

Based on stratigraphic correlations within the Middle Pleistocene Red Sand unit, Dungo IV is part of a broader complex of contemporary or sub-contemporary sites primarily located within several non-perennial river basins of the coastal plain [[79](#), [132](#), [157](#), [166](#), [168](#), [169](#), [174](#), [175](#), [177](#)]. These sites—among which include the localities of Mormolo, Uiche, Benguela, Macaca, Ponta das Vacas or Sombreiro—are all characterized by the use of beach quartz pebbles and cobbles during lithic production [[157](#), [158](#)]. Artifact production also includes a range of additional raw materials, but quartz is the most abundant on the +100 m raised beaches. This suggests the strategic and location-specific exploitation of coastal outcrops during the ESA [[169](#)]. Other raw materials form only a minor component (e.g. magmatic rocks, sandstone, quartzite and more rarely, siliceous rocks), and they likely originate from the End Rift Unconformity [[170](#)] located ca. 20 km inland from the coastal sites. A recent study [[169](#)] presents a detailed understanding of raw material availability in the landscape surrounding Dungo IV, characterizing the pebble and cobble deposits that would have been available at the time of hominin occupation. This study argues for an absence of selection based on pebble/cobble shape preferences, except for unmodified percussive tools, and it also confirmed that pebbles/cobbles were being selected in a way that mimicked the coastal lithological resources. This means that the morphometric and lithological trends evident in the Dungo IV assemblage are similar to those trends observed today in pebble/cobble outcrops of the Dungo raised beach, and the neighboring raised beach of Mormolo. At Dungo V, a similar industry has been described and it is associated with whale remains [[34](#), [178](#), [179](#)], suggesting

that coastal resource use beyond mere lithological sources is possible, and subsistence strategies at the very least may have been influenced by the available resources.

From a broader perspective, an important contrast is observable between the coastal ESA sites reported along the Angolan coast—especially south of Luanda, all along the Benguela Province coast and within the Namib Province—characterized by quartz pebble industries among Middle Pleistocene raised beaches [79, 132, 157, 257], and inland Angolan ESA sites (e.g. Angolan Plateau). These latter sites are represented by a hotspot of undated ESA localities in the extreme north-east of the country, between the Congo River and its Kasai tributary in the Lunda-Norte Province, and the site of Capangombe in the Huila Province—much closer to Benguela. Collectively, this Lunda-Norte ESA corpus—though requiring important geoarchaeological and techno-typological reappraisal—is primarily characterized by shaping strategies and/or massive artifacts related to Congo Basin techno-typological trends during Pleistocene times [132, 258–260]. At Capangombe, two undated archaeological layers preserve thousands of artifacts attributed to the Final Acheulean or ESA/MSA transition [261, 262]. Capangombe presents a wide range of Levallois products, cleavers and various types of handaxes on siliceous rock types [261, 262] suggesting a very different technology from the pebble/cobble based ESA industries along the Angolan coast—which may also be older. Consequently, we argue that the Benguela corpus, including Dungo IV and the surrounding sites, provides a specific concentration of MPT ESA coastal occupations so far with no equivalent inland. This supports the geographic concentration of ESA hominin groups in the coastal plain, where there are small running rivers only. This contrasts with the situation in South Africa or in Namibia where ESA sites are continuously encountered on the coast and inland [60, 78, 121, 263, 264]. It is also interesting to mention the Orange-Senqu River basin [265, 266] in South Africa marking an important difference in hydrographical settings between the Angolan coast and the coast of South Africa and southern Namibia. When considering the richness of ESA sites in this basin, it likely played an important role in the dispersal of early hominins in southern Africa and its relation to coastal dispersals must be re-investigated.

In this paper we list specific technological patterns evident at Dungo IV: a trend for robust micro- to large macro-tools, several production strategies taking advantage of natural convexities of pebbles and cobbles in various ways, an important component of percussive tools, a specific focus on coastal outcrops, and a quartz-based industry. Altogether, these patterns highlight a local technological trajectory very different from the Acheulean of the Middle Pleistocene of southern Africa, usually rich in LCTs even when exploiting pebble/cobble outcrops [60, 114, 138, 240, 248, 251, 254, 267–269]. No similarities occur when looking at the Middle Pleistocene assemblages of Central Africa, characterized by massive shaped tools, such as at Elarmékora in Gabon [80] or in the Lunda-Norte region of Angola [132, 258]. Consequently, we propose the existence of a “local technological trajectory” at Dungo IV, whereby ESA people adapted their technology within a delimited area and during a specific period. Indeed, they developed an atypical lithic industry and took advantage of pre-existing lithological and morphometric characteristics in the local coastal marine pebble/cobble outcrops. This local technological trajectory is characterized by strategies that take advantage of natural convexities of beach pebbles and cobbles, for producing robust tools of all size categories with potentially diverse active parts (percussive surfaces, cutting edges, pointed and piercing tips). In addition, artifacts barely reach 10 cm long but they are notably thick, and the natural pebble/cobble convexities are systematically advantageous for the knappers. Robustness is present both in the potentially active and handled parts, suggesting a toolkit resistant to forceful activities (across both prehensile and active tool portions). LCTs are scarce and appear to have played a minor role in the technical system (production and use) described at both Dungo IV and Dungo V [178, 179]. Historically, LCTs have been found in surface contexts in the Dungo River Valley

[79, 132, 177], but the *in situ* Dungo IV assemblage does not contain any. These LCTs may relate to other phases or types of occupation in the valley that are yet to be discovered. At Dungo IV, a major characteristic are the pebble/cobble tools, obtained through generalist and specialized operational schemes, which exhibit notable diversity both in terms of their overall morpho-structure [169] and in their potentially active parts.

These specific technical patterns are restricted spatially, occurring only in the coastal ESA sites and within the +100 m raised beaches of the Benguela Province. Though other coastal ESA occurrences have been reported within Middle Pleistocene raised beaches in Angola, this site accumulation has no echo inland. ESA inland sites present very different technological patterns. We argue for a specific coastal settlement in Dungo IV and its surroundings, where coastal lithological resources played an important role in the technical system of populations and are highly likely to have influenced both the nature of the toolkits and the production schemes and mental templates of the knappers.

This paper clearly documents the use of coastal environments and resources by hominins since at least the beginning of Middle Pleistocene in southern Africa thanks to the repeated and extended occupation of the coast for several activities, among which includes raw material procurement in marine pebble/cobble deposits. These occupations also provide proof for specific technical behaviors highly influenced and adapted to coastal lithological resources. We suggest the integration of coastal landscapes within ESA hominin territories, and we suggest that the path toward coastal adaptation is a process much more deeply rooted in time—concurring with the hypothesis proposed by Fischer et al. [57].

This paper shows that lithic resources may have played a role in coastal 'territorialization'—the process during which spaces get integrated into group territories [147]. In this case, the record so far suggests that systematic coastal raw material procurement predates systematic alimentary coastal foraging, and raw materials may have acted as an attractive resource in southern Africa impacting hominin dispersals along the coast. It also confirms the hypothesis proposed in South Africa for ESA surface finds in the Namaqualand [5] and in the KwaZulu-Natal Province [85]. Both authors suggest Acheulean groups were moving to the coast to procure raw materials and this would explain why typical ESA artifacts are scattered among the Middle Pleistocene raised beaches. In southern Namibia, Corvinus [60] proposed continuous ESA occupations across 100 km of early Middle Pleistocene raised beaches, from Gemsbok to Uubvley, and correlated them to ESA sites at least 40 km inland along the Orange River. Though more data are needed (i.e., excavations and absolute dating) it is a hypothesis which echoes our observations in the Benguela Province where the ESA is also continuous along the coast. However, the primary difference is that the presence of the Orange River hydrographic network may have emphasized the connection between coastal and inland sites in southern Namibia. In the case of Dungo IV, investigating the lithic assemblage in greater detail will allow us to raise new questions about the chronological gap that exists in southern Africa between early Middle Pleistocene populations and, predictable resource foraging at the very end of the Middle Pleistocene that is associated with MSA behavioral changes [20, 21]. The latter is usually related to the development and emergence of *Homo sapiens* during the second half of the Middle Pleistocene [270, 271]. Dungo IV provides evidence that coastal resources influenced hominin behaviors since at least the beginning of the Middle Pleistocene in southern Africa, and this contributes to the trend in pushing back such behaviors and disassociating them with the younger MSA. Therefore, it challenges the impression of an abrupt emergence of behaviors, as argued for the MSA—visibility that is otherwise linked to differential preservation biases and post-depositional perturbation of sites that likely reflect different landscape patterns.

Earlier evidence of coastal territorialization could also be proposed considering the corpus of coastal Early and Middle Pleistocene Acheulean sites in Northern Africa, and particularly in

Morocco [272–275]. It has even been suggested that Northern African Acheulean sites share technological affinities with sites in the Iberic Peninsula, potentially highlighting the important role of coastal paths for early hominin dispersals [276]. In addition, it has been shown that several non-human primate species are consuming fish and aquatic resources [277] among which two examples show a diet adapted to coastal shellfish resources [278, 279]. Indeed, specialized coastal foraging strategies cannot be unique only to modern humans and modern behaviors. In fact, the southern African record shows a gradual intensification of coastal activities by humans with: hominin dispersals in the coastal plain during the Early Pleistocene [59], an integration of coastal resources in ESA hominin territories at least by 600 ka (such as in the Benguela Province), the occasional consumption of marine resources from the end of the Middle Pleistocene—or even before by scavenging stranded carcasses [178]—and, an intensification of coastal resource foraging from MIS 5 [17] and particularly at the end of the Pleistocene [19]. Concurrently, similar trends occurred in other parts of the world, such as the development of marine resource foraging by Neanderthal groups from MIS5 [280–282], Early Pleistocene coastal dispersals in North Africa [273] and early Middle Pleistocene coastal raw material exploitation in the Early Paleolithic of the Brittany coast in France [283–285]. Consequently we concur with our colleagues [26], who argue for a revisiting of the hypothesis claiming the southern African coastal environment acted as a pulse for the emergence and development of modern behaviors and *Homo sapiens*. The revision of this hypothesis must take into consideration both the inland contemporary record and the coastal Early and Middle Pleistocene record.

## Conclusion

Initially, the appearance of a “pebble industry” raised questions about the chrono-cultural attribution of the lithic assemblage at Dungo IV [153]. A question that was reinvigorated when new dating of the coastal site pointed toward an early Middle Pleistocene burial duration, between  $614.5 \pm 9.5$  ka and  $662.05 \pm 10.24$  ka [156] that suggested contemporaneity with the later Acheulean in southern Africa. Our detailed lithic analysis exhibits several patterns which allow us to associate Dungo IV to the Acheulean techno-complex, such as prepared cores and bifacial symmetry in shaping strategies. However, this evidence is scarce, marginal and poorly represented in the assemblage. We highlight different and well-defined flaking and shaping strategies reflecting precise mental templates despite short “*chaînes opératoires*”. In addition, the coastal lithological environment seems to have played a pivotal role in the technical system adopted by local populations (production strategies and toolkits). The site preserves a quartz-based industry where all sizes of rounded gravels were exploited, and where knappers systematically took advantage of the natural convexities on these coastal clasts in many different ways. Though the site falls into the later Acheulean chronological range [90, 114, 124, 240, 268, 286], the technological patterns of the Acheulean are rare and Large Cutting Tool production is very marginal, suggesting little attention was given to long and thin cutting edges amongst the larger toolkit. Instead, robust cutting edges and morpho-structures, micro- to macro-tool sizes, and shaped to simply retouched blanks, are well-represented, along with percussive wear. Our results support various on-site activities among which include knapping activities, particularly evident through refits and local raw material procurement [169]. All these patterns show how specific the ESA technology is at Dungo IV, and how coastal lithological resources have influenced operational schemes giving rise to a local technological trajectory.

From a geographic and chronological perspective, Dungo IV is associated with a wider complex of early Middle Pleistocene sites contained within Red Sand deposits overlying a Calabrian marine conglomerate on the +100 m raised beaches of the Benguela Province [160].



This marine conglomerate points toward a coastal plain opening at the very end of the Early Pleistocene in this area, as has been suggested for South Africa by Compton [100]. All the sites reported among the +100 m Middle Pleistocene raised beaches exhibit this quartz gravel use [157, 158]. These sites have no equivalent in terms of technology or chronology inland, suggesting a unique complex of ESA coastal sites. In addition, this points toward an extended and repeated use of coastal lithological resources for stone tool production, confirming the coastal fringe was well-integrated in early hominins' landscape and mobility strategies, at least for raw material procurement. However, with the exception of Dungo V [34, 178], subsistence strategies remain unknown so it is not possible to evaluate to which extent coastal resources may have also influenced the diet of these hominins. Consequently, regarding the available data, we argue that raw material procurement likely served to help attract populations, leading to the progressive occupation of coastal areas. Subsequently, raw material procurement appears as a first step toward coastal resource acquisition and management, and it predates the more extensive and well-preserved coastal adaptations that occur from the very end of the Middle Pleistocene through to the Late Pleistocene [17].

In the broader context of the coastal southern African Stone Age, several sites dated to the Mid-Pleistocene Transition and located within the southern African coastal plain support an extended presence of hominins in coastal landscapes even though artifacts are often scattered and site formation processes are very challenging [57, 59]. This shows that Dungo IV may not be the only evidence of coastal “*territorialization*” by hominins during Acheulean times in southern Africa—it potentially occurs in other coastal areas of Africa [89, 273, 275, 287, 288].

Finally, all these southern African ESA coastal sites are still too rarely mentioned despite their high potential to provide details on: early hominin coastal dispersals (a crucial step prior to “adaptation”), paleo-demographic dynamics along watercourses, early technical behaviors in coastal contexts, and, the origins of adaptation to coastal ecological niches much earlier than what is currently preserved in the Middle Stone Age record of southern Africa.

## Supporting information

**S1 Table. Coastal ESA sites and localities from the coastal plain.** Geographic and contextual information of ESA sites and localities reported in the southern African coastal plain since the early 20th century based on the synthesis of bibliographic data.

(DOCX)

**S2 Table. Morphometric data set used for intersite comparison.** Length, maximal width, maximal thickness, elongation and fineness of the shaped tools from Gemsbok, Penhill Farm, Dungo IV, Namib IV, Elandsfontein and Cape Hangklip.

(DOCX)

**S3 Table. Tukey HSD Test results for the intersite comparison.** Results are presented for each qualitative variable and for each site.

(DOCX)

## Acknowledgments

Authors are grateful to all the people and institutions which allowed access to collections and provided logistical support in South Africa, Namibia and Angola. We are thankful to Hubert Forestier and Manuel Gutierrez for their specific help regarding Dungo IV material access and the methodology of study. I.M. is particularly thankful to Katyana, Rosano, Bylloo, Nelo, Marysa and Emilio from the Museum Nacional de Arqueologia de Benguela for their assistance during lithic collection analysis and fieldwork. We are thankful to Sylvie Ricord for assistance

with English editing. The authors wish to thank the Editor and Geoff Bailey for their helpful comments that improved the quality of this paper.

## Author Contributions

**Conceptualization:** Isis Mesfin.

**Data curation:** Maria-Helena Benjamim.

**Formal analysis:** Isis Mesfin, Anne-Elisabeth Lebatard.

**Funding acquisition:** Isis Mesfin, Maria-Helena Benjamim, David Pleurdeau.

**Investigation:** Isis Mesfin, Anne-Elisabeth Lebatard, Jorge Matos, Matt Lotter.

**Methodology:** Isis Mesfin.

**Project administration:** Isis Mesfin, Maria-Helena Benjamim.

**Supervision:** Maria-Helena Benjamim, David Pleurdeau, Matt Lotter.

**Validation:** Maria-Helena Benjamim, Thibaud Saos, David Pleurdeau, Matt Lotter.

**Visualization:** Isis Mesfin.

**Writing – original draft:** Isis Mesfin, Anne-Elisabeth Lebatard, Jorge Matos.

**Writing – review & editing:** Isis Mesfin, Anne-Elisabeth Lebatard, Thibaud Saos, David Pleurdeau, Matt Lotter.

## References

1. White F. La végétation de l'Afrique. ORSTOM-UNESCO. 1986. 384 p.
2. Badenhorst S, Ezeimo J, Lebatla LT, van Niekerk KL, Henshilwood CS. Variability in hunting behaviour during the Middle Stone Age in the Eastern and Western Cape of South Africa. *Journal of Archaeological Science: Reports*. 2022 Aug 1; 44:103527.
3. Brenner MJ, Ryano KP, Wurz S. Coastal adaptation at Klasies River main site during MIS 5c-d (93,000–110,000 years ago) from a southern Cape perspective. *The Journal of Island and Coastal Archaeology*. 2022 Apr 3; 17(2):218–45.
4. Deacon J. The Later Stone Age of Southernmost Africa. BAR International Series 213. Vol. Cambridge Monographs in African Archaeology 12. 1984. 441 p.
5. Dewar GI. The archaeology of the coastal desert of Namaqualand, South Africa: a regional synthesis [PhD Thesis]. University of Cape Town; 2007.
6. Douze K, Delagnes A, Wurz S, Henshilwood CS. The Howiesons Poort lithic sequence of Klipdrift Shelter, southern Cape, South Africa. *PLOS ONE*. 2018 Nov 7; 13(11):e0206238. <https://doi.org/10.1371/journal.pone.0206238> PMID: 30403722
7. Haaland MM, Miller CE, Unhammer OF, Reynard JP, van Niekerk KL, Ligouis B, et al. Geoarchaeological investigation of occupation deposits in Blombos Cave in South Africa indicate changes in site use and settlement dynamics in the southern Cape during MIS 5b-4. *Quaternary Research*. 2021; 100:170–223.
8. Hatton A, Schoville BJ, Wilkins J. A quantitative analysis of wear distributions on Middle Stone Age marine shell beads from Blombos Cave, South Africa. *Journal of Archaeological Science: Reports*. 2020; 29:102137.
9. Jacobs Z, Jones BG, Cawthra HC, Henshilwood CS, Roberts RG. The chronological, sedimentary and environmental context for the archaeological deposits at Blombos Cave, South Africa. *Quaternary Science Reviews*. 2020; 235:105850.
10. Jerardino AMS, Malan A, Braun D. The Archaeology of the West Coast of South Africa. Archaeopress Oxford; 2013.
11. Kumbani J, Bradfield J, Rusch N, Wurz S. A functional investigation of southern Cape Later Stone Age artefacts resembling aerophones. *Journal of Archaeological Science: Reports*. 2019 Apr 1; 24:693–711.

12. Marean CW, Bar-Matthews M, Bernatchez J, Fisher E, Goldberg P, Herries AIR, et al. Early human use of marine resources and pigment in South Africa during the Middle Pleistocene. *Nature*. 2007 Oct; 449(7164):905–8. <https://doi.org/10.1038/nature06204> PMID: 17943129
13. Niespolo EM, Sharp WD, Avery G, Dawson TE. Early, intensive marine resource exploitation by Middle Stone Age humans at Ysterfontein 1 rockshelter, South Africa. *Proceedings of the National Academy of Sciences*. 2021 Apr 20; 118(16):e2020042118. <https://doi.org/10.1073/pnas.2020042118> PMID: 33846250
14. Texier PJ, Porraz G, Parkington J, Rigaud JP, Poggenpoel C, Tribolo C. The context, form and significance of the MSA engraved ostrich eggshell collection from Diepkloof Rock Shelter, Western Cape, South Africa. *Journal of Archaeological Science*. 2013 Sep 1; 40(9):3412–31.
15. Texier PJ, Porraz G, Parkington J, Rigaud JP, Poggenpoel C, Miller C, et al. A Howiesons Poort tradition of engraving ostrich eggshell containers dated to 60,000 years ago at Diepkloof Rock Shelter, South Africa. *Proceedings of the National Academy of Sciences*. 2010 Apr 6; 107(14):6180–5.
16. Will M, Bader GD, Sommer C, Cooper A, Green A. Coastal adaptations on the eastern seaboard of South Africa during the Pleistocene and Holocene? Current evidence and future perspectives from archaeology and marine geology. *Frontiers in Earth Science [Internet]*. 2022 [cited 2022 Aug 21]; 10. Available from: <https://www.frontiersin.org/articles/10.3389/feart.2022.964423>
17. Will M, Kandel AW, Kyriacou K, Conard NJ. An evolutionary perspective on coastal adaptations by modern humans during the Middle Stone Age of Africa. *Quaternary International*. 2016 Jun 6; 404:68–86.
18. Namib Kinahan J., the archeology of an African Desert. University of Namibia Press. Windhoek; 2021. 546 p.
19. Jerardino AMS. On the origins and significance of Pleistocene coastal resource use in southern Africa with particular reference to shellfish gathering. *Journal of Anthropological Archaeology*. 2016 Mar 1; 41:213–30.
20. Marean CW. The transition to foraging for dense and predictable resources and its impact on the evolution of modern humans. *Philosophical Transactions of the Royal Society B: Biological Sciences*. 2016; 371(1698):20150239. <https://doi.org/10.1098/rstb.2015.0239> PMID: 27298470
21. Marean CW. The origins and significance of coastal resource use in Africa and Western Eurasia. *Journal of Human Evolution*. 2014 Dec 1; 77:17–40. <https://doi.org/10.1016/j.jhevol.2014.02.025> PMID: 25498601
22. Will M, Kandel AW, Conard NJ. Midden or Molehill: The Role of Coastal Adaptations in Human Evolution and Dispersal. *J World Prehist*. 2019 Mar 1; 32(1):33–72.
23. Klein RG, Bird DW. Shellfishing and human evolution. *Journal of Anthropological Archaeology*. 2016; 44:198–205.
24. Langejans GHJ, van Niekerk KL, Dusseldorp GL, Thackeray JF. Middle Stone Age shellfish exploitation: Potential indications for mass collecting and resource intensification at Blombos Cave and Klasies River, South Africa. *Quaternary International*. 2012 Aug 23; 270:80–94.
25. McBrearty S, Brooks A. The revolution that wasn't: a new interpretation of the origin of modern human behavior. *J Hum Evol*. 2000 Nov; 39(5):453–563. <https://doi.org/10.1006/jhev.2000.0435> PMID: 11102266
26. Wilkins J, Schoville BJ, Pickering R, Gliganic L, Collins B, Brown KS, et al. Innovative Homo sapiens behaviours 105,000 years ago in a wetter Kalahari. *Nature*. 2021 Apr; 592(7853):248–52.
27. Marean CW. Pinnacle Point Cave 13B (Western Cape Province, South Africa) in context: The Cape Floral kingdom, shellfish, and modern human origins. *Journal of Human Evolution*. 2010 Sep 1; 59(3):425–43. <https://doi.org/10.1016/j.jhevol.2010.07.011> PMID: 20934095
28. d'Errico F, Henshilwood C, Vanhaeren M, van Niekerk K. Nassarius kraussianus shell beads from Blombos Cave: evidence for symbolic behaviour in the Middle Stone Age. *Journal of Human Evolution*. 2020 Jun 16; 48(1):3–24.
29. Kyriacou K, Parkington JE, Marais AD, Braun DR. Nutrition, modernity and the archaeological record: Coastal resources and nutrition among Middle Stone Age hunter-gatherers on the western Cape coast of South Africa. *Journal of Human Evolution*. 2014 Dec 1; 77:64–73. <https://doi.org/10.1016/j.jhevol.2014.02.024> PMID: 25440132
30. Villa P, Soriano S, Tsanova T, Degano I, Higham TFG, d'Errico F, et al. Border Cave and the beginning of the Later Stone Age in South Africa. *PNAS*. 2012 Aug 14; 109(33):13208–13. <https://doi.org/10.1073/pnas.1202629109> PMID: 22847432

31. Case S. Archaeological impact assessment proposed abalone holding and processing facility on the Farm Rooiklippe, near Kleinzee, Northern Cape—Report prepared for Anchor Environmental Consultants. ACRM; 2018 p. 28.
32. Thompson E. Acheulean artifact accumulation and early hominin land use, Garden Route Casino Road, Pinnacle Point, South Africa. *Geoarchaeology: An International Journal*. 2009; 24(4):402–28.
33. Kandel AW, Conard NJ. Scavenging and processing of whale meat and blubber by Later Stone Age people of the Geelbek Dunes, Western Cape Province, South Africa. *South African Archaeological Bulletin*. 2003; 58(178):91–3.
34. Mesfin I, Pleurdeau D, Benjamim MH, Forestier H. An overview of stranded cetacean scavenging in Atlantic southern Africa since the Earlier Stone Age. *Les nouvelles de l'archéologie*. 2021; Volume spécial(166):64–9.
35. Smith AB, Kinahan J. The invisible whale. *World Archaeology*. 1984; 16(1):89–97.
36. Budack K. The Aonin or Topnaar of the Lower! Khuseb Valley and the sea. *Khoisan Linguistic Studies*. 1977; 3(1977):1–42.
37. Budack KFR. A harvesting people on the South Atlantic Coast. *South African journal of ethnology*. 1983; 6(2):1–7.
38. Jacobson L, Noli D. An Eye Witness Account of Coastal Settlement and Subsistence along the Northern Namibian Coast. *The South African Archaeological Bulletin*. 1987; 42(146):173.
39. Raven-Hart R. Before Van Riebeeck: Callers at South Africa from 1488 to 1652. C. Struik; 1967.
40. Thom HB. *Journal of Jan van Riebeeck*. Vol. 1. for the Van Riebeeck Society; 1952.
41. Crowther A, Faulkner P, Prendergast ME, Morales EMQ, Horton M, Wilmsen E, et al. Coastal Subsistence, Maritime Trade, and the Colonization of Small Offshore Islands in Eastern African Prehistory. *The Journal of Island and Coastal Archaeology*. 2016 May 3; 11(2):211–37.
42. Faulkner P, Miller JM, Morales EMQ, Crowther A, Shipton C, Ndiema E, et al. 67,000 years of coastal engagement at Panga ya Saidi, eastern Africa. *PLOS ONE*. 2021 Aug 26; 16(8):e0256761. <https://doi.org/10.1371/journal.pone.0256761> PMID: 34437643
43. Acheson JM. Anthropology of fishing. *Annual review of anthropology*. 1981; 10(1):275–316.
44. Artaud H. Anthropologie maritime ou anthropologie de la mer? *Revue d'ethnoécologie* [Internet]. 2018 Mar 2 [cited 2019 Apr 28];(13). Available from: <http://journals.openedition.org/ethnoecologie/3484>
45. Erlandson JM. The Archaeology of Aquatic Adaptations: Paradigms for a New Millennium. *Journal of Archaeological Research*. 2001 Dec 1; 9(4):287–350.
46. Washburn SL, Lancaster GS. The evolution of hunting. In: *Man the hunter*. Routledge; 1968. p. 293–303.
47. Gaffney D. Pleistocene Water Crossings and Adaptive Flexibility Within the Homo Genus. *Journal of Archaeological Research*. 2020;1–72.
48. Erlandson JM. Food for Thought: The Role of Coastlines and Aquatic Resources in Human Evolution. In: Cunnane SC, Stewart KM, editors. *Human Brain Evolution: The Influence of Freshwater and Marine Food Resources* [Internet]. Hoboken, NJ, USA: John Wiley & Sons, Inc.; 2010 [cited 2020 Jan 6]. p. 125–36. <http://doi.wiley.com/10.1002/9780470609880.ch7>
49. Archer W, Braun DR, Harris JWK, McCoy JT, Richmond BG. Early Pleistocene aquatic resource use in the Turkana Basin. *Journal of Human Evolution*. 2014 Dec 1; 77:74–87. <https://doi.org/10.1016/j.jhevol.2014.02.012> PMID: 24721760
50. Bailey G, Milner N. Coastal hunter-gatherers and social evolution: marginal or central? *Before farming*. 2002; 2002(3–4):1–22.
51. Broadhurst CL, Crawford MC. The Epigenetic Emergence of Culture at the Coastline: Interaction of Genes, Nutrition, Environment and Demography. *Human Evolution*. 2013; 28:267–95.
52. Crawford MA, Leigh Broadhurst C, Guest M, Nagar A, Wang Y, Ghebremeskel K, et al. A quantum theory for the irreplaceable role of docosahexaenoic acid in neural cell signalling throughout evolution. *Prostaglandins, Leukotrienes and Essential Fatty Acids*. 2013 Jan 1; 88(1):5–13. <https://doi.org/10.1016/j.plefa.2012.08.005> PMID: 23206328
53. Stewart KM. The case for exploitation of wetlands environments and foods by pre-sapiens hominins. *Human Brain Evolution The Influence of Freshwater and Marine Food Resources*. 2010;137–71.
54. Stewart KM. Early hominid utilisation of fish resources and implications for seasonality and behaviour. *Journal of Human Evolution*. 1994; 27(1–3):229–45.
55. Yesner DR, Ayres WS, Carlson DL, Davis RS, Dewar R, Morales MRG, et al. Maritime hunter-gatherers: ecology and prehistory [and comments and reply]. *Current Anthropology*. 1980; 21(6):727–50.



56. Joordens JCA, Wesselingh FP, de Vos J, Vonhof HB, Kroon D. Relevance of aquatic environments for hominins: a case study from Trinil (Java, Indonesia). *J Hum Evol*. 2009 Dec; 57(6):656–71. <https://doi.org/10.1016/j.jhevol.2009.06.003> PMID: 19683789
57. Fisher EC, Albert RM, Botha G, Cawthra HC, Esteban I, Harris J, et al. Archaeological Reconnaissance for Middle Stone Age Sites Along the Pondoland Coast, South Africa. 2013 [cited 2020 May 5]; <https://digital.csic.es/handle/10261/94139>
58. Braun DR, Levin NE, Roberts D, Stynder D, Forrest F, Herries AI, et al. Initial investigations of Acheulean hominin behaviour at Elandsfontein. In: *The Archaeology of the West Coast of South Africa*. Archaeopress; 2013. p. 10–23.
59. Braun DR, Levin NE, Stynder D, Herries AIR, Archer W, Forrest F, et al. Mid-Pleistocene Hominin occupation at Elandsfontein, Western Cape, South Africa. *Quaternary Science Reviews*. 2013 Dec 15; 82:145–66.
60. Corvinus G. The raised beaches of the west coast of South West Africa/Namibia: an interpretation of their archaeological and palaeontological data. München. Vol. 5. C.H. Beck; 1983. 315 p.
61. Venter J, Pargeter J, Cawthra HC, Fisher E. The P5 project archaeological reconnaissance along the Pondoland Coast, South Africa. 2015; Society for American Archaeology 80th Annual Meeting, San Francisco.
62. Mesfin I. Les premiers peuplements du cordon littoral d'Afrique australe (1,2–0,5Ma): analyse productionnelle et morpho-structurelle des industries lithiques [Thèse de doctorat]. [Paris, France]: Muséum national d'Histoire naturelle; 2021.
63. Davies O. The Beaches at Umhlatuzana, near Durban. *The South African Archaeological Bulletin*. 1954; 9(34):60–3.
64. Davies O, Walsh C. Raised beaches and associated stone-age material in Namaqualand. *South African Journal of Science*. 1955 Apr 1; 51(9):277.
65. Laidler PW. The Evolution of Middle Palaeolithic Technique at Geelhout, Near Kareedouw, in the Southern Cape. *Transactions of the Royal Society of South Africa*. 1947 Jan 1; 31(3):283–313.
66. Macfarlane DP. Evidence in support of a pre-Chellean culture from the East London Clays. *South African Journal of Science*. 1935; 32(07):537–50.
67. Lotter MG. A preliminary assessment of Large Cutting Tool production at the Acheulean site of Penhill Farm, Lower Sundays River Valley, Eastern Cape Province, South Africa. *The South African Archaeological Bulletin*. 2020; 75(212):58–69.
68. Bradfield J, Lombard M, Reynard J, Wurz S. Further evidence for bow hunting and its implications more than 60 000 years ago: Results of a use-trace analysis of the bone point from Klasies River Main site, South Africa. *Quaternary Science Reviews*. 2020 May 15; 236:106295.
69. Wurz S. Variability in the middle stone age lithic sequence, 115,000–60,000 years ago at Klasies river, South Africa. *Journal of Archaeological Science*. 2002; 29(9):1001–15.
70. Pickering R, Jacobs Z, Herries AI, Karkanas P, Bar-Matthews M, Woodhead JD, et al. Paleoanthropologically significant South African sea caves dated to 1.1–1.0 million years using a combination of U–Pb, TT-OSL and palaeomagnetism. *Quaternary Science Reviews*. 2013; 65:39–52.
71. Figueiredo J. Diamond Desire—Probing the Epistemological Entanglements of Geology and Ethnography at Diamang (Angola). *South African Historical Journal*. 2020 Jul 2; 72(3):431–60.
72. Mesfin I, Pleurdeau D, Angue Zogo MJ, Leplongeon A. Le Middle Stone Age dans le bassin du Congo: un regard historiographique. *Journal des Africanistes*. 2020; 90(2):88–120.
73. Raja NB, Dunne EM, Matiwane A, Khan TM, Nätscher PS, Ghilardi AM, et al. Colonial history and global economics distort our understanding of deep-time biodiversity. *Nature ecology & evolution*. 2021;1–10. <https://doi.org/10.1038/s41559-021-01608-8> PMID: 34969991
74. Schlanger N. The history of a special relationship: prehistoric terminology and lithic technology between the French and South African research traditions. *From Tools to Symbols: From Early Hominids to Modern Humans*. 2005;9–37.
75. Niang K, Blinkhorn J, Ndiaye M. The oldest Stone Age occupation of coastal West Africa and its implications for modern human dispersals: New insight from Tiémassas. *Quaternary Science Reviews*. 2018 May 15; 188:167–73.
76. Mesfin I, Mussgnug U, Hallinan E. Southern African Stone Age archaeology and palaeontology in a mining context: the example of Gudrun Corvinus in the diamond mines of the Sperrgebiet, Namibia (1976–1980). *Azania: Archaeological Research in Africa*. 2022 Jul 3; 57(3):365–91.
77. Barradas L. Cronologia da Beira Mar do Sul de Mocambique. *Mem Inst cient Mozamb*. 1965; 7:23–35.
78. Clark JD. *Atlas of African prehistory*. University of Chicago Press; 1967.
79. Ervedosa C. *Arqueologia angolana*. Ministério da Cultura Angolana. Edições 70; 1980. 444 p.

80. Braucher R, Oslisly R, Mesfin I, Ntoutoume Mba P, Aster T. In situ-produced  $^{10}\text{Be}$  and  $^{26}\text{Al}$  indirect dating of Elarmékora Earlier Stone Age artifacts: first attempt in a savannah forest mosaic in the middle Ogooué valley, Gabon. *Philosophical Transactions of the Royal Society B: Biological Sciences*. 2022;
81. Mesfin I, Texier PJ. Prepared core technology from the Early Pleistocene site of Nyabusosi 18, Uganda. *Journal of Archaeological Science: Reports*. 2022 Dec 1; 46:103695.
82. Davies O. Pleistocene shorelines in the Western Cape and South-West Africa. *Annals of the Natal Museum*. 1973 Sep 1; 21(3):719–65.
83. Davies O. Pleistocene shorelines in the southern and south-eastern Cape Province (Part 2). *Annales of the Natal Museum*. 1972;225–79.
84. Davies O. Pleistocene shorelines in the southern and south-eastern Cape Province (Part 1). *Annals of the Natal Museum*. 1971 Dec 1; 21(1):183–223.
85. Davies O. Pleistocene beaches of Natal. *Annals of the Natal Museum*. 1970; 20(2):403–42.
86. Davies O. The Quaternary Beaches of South Africa: With Special Reference to the 200 ft. Beach in Natal and the Eastern Province. *The South African Archaeological Bulletin*. 1969; 24(95/96):125–6.
87. Davies O. The raised beaches of Angola and South-west Africa. In: *Acts IV Panafrican Congress on Prehistory*. 1959. p. 289–94.
88. Pedoja K, Husson L, Regard V, Cobbold PR, Ostancaux E, Johnson ME, et al. Relative sea-level fall since the last interglacial stage: Are coasts uplifting worldwide? *Earth-Science Reviews*. 2011 Sep 1; 108(1):1–15.
89. Beyin A. The Western Periphery of the Red Sea as a Hominin Habitat and Dispersal Corridor: Marginal or Central? *J World Prehist* [Internet]. 2021 Aug 13 [cited 2021 Sep 23]; Available from: <https://doi.org/10.1007/s10963-021-09157-5>
90. Kuman K. Acheulean Industrial Complex. In: *Encyclopedia of Global Archaeology*. Smith C. (Eds). Cham: Springer International Publishing; 2019. p. 1–12.
91. Head MJ, Gibbard PL. Early-Middle Pleistocene transitions: an overview and recommendation for the defining boundary. *Geological Society, London, Special Publications*. 2005; 247(1):1–18.
92. McNabb J. Hominins and the Early-Middle Pleistocene transition: evolution, culture and climate in Africa and Europe. *Geological Society, London, Special Publications*. 2005; 247(1):287–304.
93. Mudelsee M, Schulz M. The Mid-Pleistocene climate transition: onset of 100 ka cycle lags ice volume build-up by 280 ka. *Earth and Planetary Science Letters*. 1997 Sep 1; 151(1):117–23.
94. Bintanja R, Van de Wal RSW. North American ice-sheet dynamics and the onset of 100,000-year glacial cycles. *Nature*. 2008; 454(7206):869. <https://doi.org/10.1038/nature07158> PMID: 18704083
95. Elderfield H, Ferretti P, Greaves M, Crowhurst S, McCave IN, Hodell D, et al. Evolution of ocean temperature and ice volume through the mid-Pleistocene climate transition. *Science*. 2012; 337(6095):704–9. <https://doi.org/10.1126/science.1221294> PMID: 22879512
96. Clark PU, Archer D, Pollard D, Blum JD, Rial JA, Brovkin V, et al. The middle Pleistocene transition: characteristics, mechanisms, and implications for long-term changes in atmospheric  $\text{pCO}_2$ . *Quaternary Science Reviews*. 2006 Dec 1; 25(23):3150–84.
97. Trauth MH, Maslin MA, Deino AL, Strecker MR, Bergner AGN, Dühnforth M. High- and low-latitude forcing of Plio-Pleistocene East African climate and human evolution. *Journal of Human Evolution*. 2007 Nov 1; 53(5):475–86. <https://doi.org/10.1016/j.jhevol.2006.12.009> PMID: 17959230
98. Klein RG, Cruz-Urbe K. The Bovids from Elandsfontein, South Africa, and Their Implications for the Age, Palaeoenvironment, and Origins of the Site. *The African Archaeological Review*. 1991; 9:21–79.
99. Compton JS. Quaternary environmental change on the southern African coastal plain. In 2017. p. 88–97.
100. Compton JS. Pleistocene sea-level fluctuations and human evolution on the southern coastal plain of South Africa. *Quaternary Science Reviews*. 2011; 30(5–6):506–27.
101. Cawthra HC, Anderson RJ, De Vynck JC, Jacobs Z, Jerardino A, Kyriacou K, et al. Migration of Pleistocene shorelines across the Palaeo-Agulhas Plain: Evidence from dated sub-bottom profiles and archaeological shellfish assemblages. *Quaternary Science Reviews*. 2020 May 1; 235:106107.
102. Cooper A, Green A. A standardized database of Marine Isotope Stage 5e sea-level proxies in southern Africa (Angola, Namibia and South Africa). *Earth System Science Data*. 2021 Mar 9; 13(3):953–68.
103. Marean CW, Cowling RM, Franklin J. The Palaeo-Agulhas Plain: Temporal and spatial variation in an extraordinary extinct ecosystem of the Pleistocene of the Cape Floristic Region. *Quaternary Science Reviews*. 2020 May 1; 235:106161.
104. Fisher EC, Bar-Matthews M, Jerardino AMS, Marean CW. Middle and Late Pleistocene paleoscape modeling along the southern coast of South Africa. *Quaternary Science Reviews*. 2010 Jun 1; 29(11):1382–98.

105. Herries AIR, Arnold LJ, Boschian G, Blackwood AF, Wilson C, Mallett T, et al. A marine isotope stage 11 coastal Acheulian workshop with associated wood at Amanzi Springs Area 1, South Africa. *PLOS ONE*. 2022 Oct 20; 17(10):e0273714. <https://doi.org/10.1371/journal.pone.0273714> PMID: 36264956
106. Gehring AU, Riahi N, Kind J, Almqvist BSG, Weidler PG. The formation of the Namib Sand Sea inferred from the spatial pattern of magnetic rock fragments. *Earth and Planetary Science Letters*. 2014 Jun 1; 395:168–72.
107. Miller RM. Evidence for the evolution of the Kalahari dunes from the Auob River, southeastern Namibia. *Transactions of the Royal Society of South Africa*. 2014 Sep 2; 69(3):195–204.
108. Ward JD, Corbett I. Towards an age for the Namib. *Namib ecology*. 1990; 25:17–26.
109. Etourneau J, Martinez P, Blanz T, Schneider R. Pliocene–Pleistocene variability of upwelling activity, productivity, and nutrient cycling in the Benguela region. *Geology*. 2009 Oct 1; 37(10):871–4.
110. Marlow JR, Lange CB, Wefer G, Rosell-Melé A. Upwelling intensification as part of the Pliocene–Pleistocene climate transition. *Science*. 2000; 290(5500):2288–91. <https://doi.org/10.1126/science.290.5500.2288> PMID: 11125138
111. Hoetzel S, Dupont LM, Wefer G. Miocene–Pliocene vegetation change in south-western Africa (ODP Site 1081, offshore Namibia). *Palaeogeography, Palaeoclimatology, Palaeoecology*. 2015 Apr 1; 423:102–8.
112. Pether J. The sedimentology, palaeontology and stratigraphy of coastal-plain deposits at Hondeklip Bay, Namaqualand, South Africa [Internet] [Master's Thesis]. [Cape Town]: University of Cape Town; 1994 [cited 2021 Aug 27]. <https://open.uct.ac.za/handle/11427/22469>
113. Shea JJ. Stone tools in human evolution: behavioral differences among technological primates. Cambridge University Press; 2016.
114. Sharon G. Acheulian Large Flake Industries: Technology, Chronology, and Significance. BAR International Series. Oxford; 2007. 236 p. (BAR International Series).
115. Texier PJ. Technological Assets for the Emergence of the Acheulean? Reflections on the Kokiselei 4 Lithic Assemblage and Its Place in the Archaeological Context of West Turkana, Kenya. In: Gallotti R, Mussi M, editors. *The Emergence of the Acheulean in East Africa and Beyond* [Internet]. Cham: Springer International Publishing; 2018 [cited 2018 Nov 28]. p. 33–52. [http://link.springer.com/10.1007/978-3-319-75985-2\\_3](http://link.springer.com/10.1007/978-3-319-75985-2_3)
116. Smith GM, Ruebens K, Gaudzinski-Windheuser S, Steele TE. Subsistence strategies throughout the African Middle Pleistocene: Faunal evidence for behavioral change and continuity across the Earlier to Middle Stone Age transition. *Journal of Human Evolution*. 2019 Feb 1; 127:1–20. <https://doi.org/10.1016/j.jhevol.2018.11.011> PMID: 30777352
117. Féblot-Augustins J. Exploitation des matières premières dans l'Acheuléen d'Afrique: perspectives comportementales. *Paléo, Revue d'Archéologie Préhistorique*. 1990; 2(1):27–42.
118. Grove M, Pearce E, Dunbar RIM. Fission-fusion and the evolution of hominin social systems. *Journal of Human Evolution*. 2012 Feb 1; 62(2):191–200. <https://doi.org/10.1016/j.jhevol.2011.10.012> PMID: 22197359
119. Vaughan PC. A million years of style and function: regional and temporal variation in Acheulean handaxes. In: *Style and function: Conceptual issues in evolutionary archaeology*. Hurt T.D., Rakita G.F.M. (eds.). Greenwood Publishing Group; 2001.
120. Deacon HJ. Demography, subsistence, and culture during the Acheulian in southern Africa. In: Butzer K W & Isaac G.LI, eds, *After the Australopithecines*. 1975;543–69.
121. Sampson CG. *The Stone Age Archaeology of Southern Africa*. Academic Press. New York, London; 1974. 518 p.
122. Sampson CG. *The Stone Age industries of the Orange River Scheme and South Africa*. National Museum. Bloemfontein; 1972. 298 p. (Memoir).
123. de la Torre I. The origins of the Acheulean: past and present perspectives on a major transition in human evolution. *Phil Trans R Soc B*. 2016 Jul 5; 371(1698):20150245. <https://doi.org/10.1098/rstb.2015.0245> PMID: 27298475
124. Sahnouni M, Semaw S, Rogers MJ. The African Acheulean. In: *The Oxford Handbook of African Archaeology*. Mitchell Peter, Lane Paul J. (Eds.). Oxford University Press; 2013. p.
125. Dusseldorp G, Langejans GHJ. Carry that weight: coastal foraging and transport of marine resources during the South African Middle Stone Age. *Southern African Humanities*. 2013 Jan 1; 25(1):105–35.
126. Henshilwood CS, Marean CW, Chase P, Davidson I, Gamble C, Holliday TW, et al. The origin of modern human behavior: critique of the models and their test implications. *Current anthropology*. 2003; 44(5):627–51.

127. Henshilwood CS, d'Errico F, Yates R, Jacobs Z, Tribolo C, Duller GAT, et al. Emergence of Modern Human Behavior: Middle Stone Age Engravings from South Africa. *Science*. 2002 Feb 15; 295(5558):1278–80. <https://doi.org/10.1126/science.1067575> PMID: 11786608
128. Will M, Parkington JE, Kandel AW, Conard NJ. Coastal adaptations and the Middle Stone Age lithic assemblages from Hoedjiespunt 1 in the Western Cape, South Africa. *Journal of human Evolution*. 2013; 64(6):518–37. <https://doi.org/10.1016/j.jhevol.2013.02.012> PMID: 23628196
129. Dewar G, Stewart BA. Paleoenvironments, sea levels, and land use in Namaqualand, South Africa, during MIS 6–2. In: *Africa from MIS 6–2*. Springer; 2016. p. 195–212.
130. Erlandson JM. Coastlines, marine ecology, and maritime dispersals in human history. In: *Human Dispersal and Species Movement*. Cambridge University Press. Cambridge; 2017. p. 147–63.
131. Hallinan ES. Stone Age landscape use in the Olifants River Valley, Western Cape [PhD Thesis]. University of Cape Town; 2013.
132. Clark JD. The distribution of prehistoric culture in Angola. *Companhia de Diamantes de Angola (Diamang)*; 1966. 102 p.
133. Lehmann SB, Braun DR, Dennis KJ, Patterson DB, Stynder DD, Bishop LC, et al. Stable isotopic composition of fossil mammal teeth and environmental change in southwestern South Africa during the Pliocene and Pleistocene. *Palaeogeography, Palaeoclimatology, Palaeoecology*. 2016 Sep 1; 457:396–408.
134. Ramos M. Le Paléolithique du Sud-ouest de l'Angola, vue d'ensemble. *Leba Estudos de Pré-historia e Arquelogia Lisboa*. 1982;(5):43–52.
135. King WB. Geomorphology of the Cape Peninsula [PhD Thesis]. University of Cape Town; 1983.
136. Bristow CS, Duller G a. T, Lancaster N. Age and dynamics of linear dunes in the Namib Desert. *Geology*. 2007 Jun 1; 35(6):555–8.
137. Lancaster N. How dry was dry?—Late Pleistocene palaeoclimates in the Namib Desert. *Quaternary Science Reviews*. 2002 Mar 1; 21(7):769–82.
138. Shackley M. Off-site distribution and artifact visibility in the central Namib Desert, South West Africa / Namibia. *Cimbebasia, Series B*. 1984; 4(5):55–88.
139. Teller JT, Lancaster N. Lacustrine sediments at Narabeb in the central Namib Desert, Namibia. *Palaeogeography, Palaeoclimatology, Palaeoecology*. 1986 Sep 1; 56(3):177–95.
140. Bonnemaïson J. La Géographie culturelle Cours de l'université Paris IV-Sorbonne. *Autrepart*. 2002; 21:179–90.
141. Bonnemaïson J. Voyage autour du territoire. *L'Espace géographique*. 1981; 10(4):249–62.
142. George P. Identité de groupe—identité de territoire [Sur les rapports entre population et espace]. *Espace Populations Sociétés*. 1984; 2(1):13–6.
143. Salazar D, Arenas C, Andrade P, Olguín L, Torres J, Flores C, et al. From the use of space to territorialisation during the Early Holocene in Taltal, coastal Atacama Desert, Chile. *Quaternary International*. 2018 Apr 20; 473:225–41.
144. Wickel A. Crise du territoire à Mayotte: l'exemple de la pêche artisanale. *L'Espace Politique Revue en ligne de géographie politique et de géopolitique [Internet]*. 2009 Mar 30 [cited 2019 Apr 28];(6). Available from: <http://journals.openedition.org/espacepolitique/980>
145. Dotte-Sarout É, Sand C, Bolé J, Ouetcho AJ. Archéogéographie et processus de territorialisation pré-contacts au Nord de la Grande Terre (Nouvelle-Calédonie). *Journal de la Société des Océanistes*. 2013 Oct 15;(136–137):195–207.
146. Patou-Mathis M, Clervoy P. *Préhistoire. Inflexions*. 2015; 30(3):11–7.
147. Turnbull D. Territorializing/decolonizing South American prehistory: Pedra Furada and the Cerutti Mastodon. *Tapuya: Latin American Science, Technology and Society*. 2019 Jan 1; 2(1):127–48.
148. Earle T. Archaeology, Property, and Prehistory. *Annual Review of Anthropology*. 2000; 29:39–60.
149. Bintliff J. Settlement and territory. In: *Companion Encyclopedia of Archaeology*. Routledge; 1999.
150. Mannino MA, Thomas KD, Leng MJ, Di Salvo R, Richards MP. Stuck to the shore? Investigating prehistoric hunter-gatherer subsistence, mobility and territoriality in a Mediterranean coastal landscape through isotope analyses on marine mollusc shell carbonates and human bone collagen. *Quaternary International*. 2011 Nov 1; 244(1):88–104.
151. de Matos D, Martins AC, Senna-Martinez JC, Pinto I, Coelho AG, Ferreira SS, et al. Review of Archaeological Research in Angola. *Afr Archaeol Rev [Internet]*. 2021 Feb 8 [cited 2021 May 6]; Available from: <https://doi.org/10.1007/s10437-020-09420-8>



152. Máximo BP. Archaeological Research in Colonial Angola. In: Encyclopedia of Global Archaeology [Internet]. Cham: Springer International Publishing; 2018 [cited 2018 Nov 28]. p. 1–5. [http://link.springer.com/10.1007/978-3-319-51726-1\\_3168-1](http://link.springer.com/10.1007/978-3-319-51726-1_3168-1)
153. Gutierrez M. Recherches archéologiques en Angola: Préhistoire, art rupestre, archéologie funéraire. Editions L'Harmattan; 2008.
154. Gutierrez M, Guérin C, Karlin C, de Jésus M da P, Benjamim MH, Lebatard AÉ, et al. Recherches archéologiques à Dungo. *Afrique: Archéologie & Arts*. 2010;6(25–47).
155. Gutierrez M, Benjamim MH. Pesquisas Arqueológicas à Baía Farta (Benguela-Angola) / Pesquisas Arqueológicas na Baía Farta (Benguela-Angola). L'Harmattan. 2019. 203 p.
156. Lebatard AE, Bourlès DL, Braucher R, Team A. Absolute dating of an Early Paleolithic site in Western Africa based on the radioactive decay of in situ-produced  $^{10}\text{Be}$  and  $^{26}\text{Al}$ . *Nuclear Instruments and Methods in Physics Research Section B: Beam Interactions with Materials and Atoms*. 2019; 456:169–79.
157. Pinto LJM. Arqueologia da faixa sedimentar de Benguela. A Idade da pedra e do ferro. Contributo para o seu estudo. *Leba Estudos de Pré-História e Arqueologia*. 1992;(7):203–20.
158. Pinto LJM. Le Musée National d'Archéologie de Benguela (Angola): Bilan des premiers travaux: 1979–1987. *Nsi*. 1988; 3:5–14.
159. Huntley BJ, Russo V, Lages F, Ferrand N. Biodiversity of Angola: Science & Conservation: a Modern Synthesis. Springer; 2019. 552 p.
160. Giresse P, Hoang CT, Kouyoumouzakakis G. Analysis of vertical movements deduced from a geochronological study of marine Pleistocene deposits, southern coast of Angola. *Journal of African Earth Sciences* (1983). 1984; 2(2):177–87.
161. Heileman S, O'Toole MJ. I-1 Benguela Current: LME# 29. *LME Briefs*. 2009;
162. Mpounza M, Samba-Kimbata MJ. Aperçu sur le climat de l'Afrique centrale occidentale. *Paysages quaternaires de l'Afrique centrale atlantique, ORSTOM*. 1990;31.
163. Sessa JA, Callapez PM, Dinis PA, Hendy AJW. Paleoenvironmental and Paleobiogeographical Implications of a Middle Pleistocene Mollusc Assemblage from the Marine Terraces of Baía Das Pipas, Southwest Angola. *Journal of Paleontology*. 2013 Nov 1; 87(6):1016–40.
164. Spalding MD, Fox HE, Allen GR, Davidson N, Ferdaña ZA, Finlayson MAX, et al. Marine ecoregions of the world: a bioregionalization of coastal and shelf areas. *BioScience*. 2007; 57(7):573–83.
165. Pigeon P. Géomorphologie et géomorphogenèse comparées des bourrelets marginaux brésiliens et angolais [Thèse de doctorat]. [Paris]: Université Paris Sorbonne Paris IV; 1984.
166. Feio M. As praias levantadas da região do Lobito e da Baía Farta. *Revisão da Junta de Investigação do Ultramar Gaxia de Orto*. 1960; 8(2):357–70.
167. Soares de Carvalho G. Alguns problemas dos terracos quaternários de litoral de Angola. *Boletim do Serviço de Geologia e Minas de Angola*. 1960;(2):5–15.
168. Buta-Neto A, Tavares TS, Quesne D, Guiraud M, Meister C, David B, et al. Synthèse préliminaire des travaux menés sur le bassin de Benguela (Sud Angola): implications sédimentologiques, paléontologiques et structurales. *Afr Geosci Rev*. 2006; 13:239–50.
169. Mesfin I, Lotter MG, Benjamim MH. A new approach to quantifying raw material selectivity in the African Acheulean: perspectives from Angola and South Africa. *Journal of African Archaeology*. 2021;205–34.
170. Guiraud M, Buta-Neto A, Quesne D. Segmentation and differential post-rift uplift at the Angola margin as recorded by the transform-rifted Benguela and oblique-to-orthogonal-rifted Kwanza basins. *Marine and Petroleum Geology*. 2010 May; 27(5):1040–68.
171. Walker RT, Telfer M, Kahle RL, Dee MW, Kahle B, Schwenninger JL, et al. Rapid mantle-driven uplift along the Angolan margin in the late Quaternary. *Nature Geosci*. 2016 Dec; 9(12):909–14.
172. Roberts DL, Brink JS. Dating and correlation of Neogene coastal deposits in the Western Cape (South Africa): Implications for Neotectonism. *South African Journal of Geology*. 2002 Dec 1; 105(4):337–52.
173. Mesfin I, Benjamim MH. Premiers résultats et perspectives du Mormolo Archaeological Project, Province de Benguela, Angola. Poster presented at: Préhistoire sous les tropiques; 2021 Nov 5; Paris, France.
174. Neto M. As bacias sedimentares de Benguela e Moçamedes. *Boletim do Serviço de Geologia e Minas de Angola*. 1961; 3:63–94.
175. Neto M. Estratigrafia da região de entre Benguela e o Cabo de Santa Maria (Angola). *Museu e Laboratório Mineralógico e Geológico da Universidade de Coimbra*. 1960;1–14.
176. Neto M. Nota acerca da estratigrafia da Baía Farta. *Luanda: Serviços de Geologia e Minas*; 1956.

177. Ervedosa C. A estação paleolítica da Baía Farta (Angola). Imprensa Portuguesa; 1967.
178. Gutierrez M, Guérin C, Benjamim MH, Piedade da Jesus M. Exploitation d'un grand cétacé au Paléolithique ancien: le site de Dungo V à Baía Farta (Benguela, Angola). *Comptes Rendus de l'Académie des Sciences—Series IIA—Earth and Planetary Science*. 2001 Mar 15; 332(5):357–62.
179. da Piedade de Jesus M. Recherches sur le Paléolithique inférieur de la bande côtière d'Angola. Étude comparative techno-typologique et tracéologique du matériel lithique des sites de Dungo IV, Dungo V et Dungo XII. *Afrique: Archéologie & Arts*. 2010 Sep 15;(6):103–5.
180. da Piedade de Jesus M. Recherches sur le paléolithique inférieur de la bande côtière d'Angola: étude comparative techno-typologique et tracéologique du matériel lithique des sites: de Dungo IV; Dungo V; Dungo XII [Internet]. Paris: Paris 1 Panthéon Sorbonne; 2010 [cited 2018 Jan 26]. <http://www.theses.fr/2010PA010587>
181. Chazan M, Horwitz LK. Finding the message in intricacy: The association of lithics and fauna on Lower Paleolithic Multiple Carcass Sites. *Journal of Anthropological Archaeology*. 2006 Dec 1; 25(4):436–47.
182. Delagnes A, Lenoble A, Harmand S, Brugal JP, Prat S, Tiercelin JJ, et al. Interpreting pachyderm single carcass sites in the African Lower and Early Middle Pleistocene record: A multidisciplinary approach to the site of Nadung'a 4 (Kenya). *Journal of Anthropological Archaeology*. 2006 Dec; 25(4):448–65.
183. Gibbon RJ, Pickering TR, Sutton MB, Heaton JL, Kuman K, Clarke RJ, et al. Cosmogenic nuclide burial dating of hominin-bearing Pleistocene cave deposits at Swartkrans, South Africa. *Quaternary Geochronology*. 2014; 24:10–5.
184. Dirks PHGM, Placzek CJ, Fink D, Dosseto A, Roberts E. Using  $^{10}\text{Be}$  cosmogenic isotopes to estimate erosion rates and landscape changes during the Plio-Pleistocene in the Cradle of Humankind, South Africa. *Journal of Human Evolution*. 2016 Jul 1; 96:19–34. <https://doi.org/10.1016/j.jhevol.2016.03.002> PMID: 27343770
185. Leader GM, Kuman K, Gibbon RJ, Granger DE. Early Acheulean organised core knapping strategies ca. 1.3 Ma at Rietputs 15, Northern Cape Province, South Africa. *Quaternary International*. 2018 Jun 30; 480:16–28.
186. Kuman K, Granger DE, Gibbon RJ, Pickering TR, Caruana MV, Bruxelles L, et al. A new absolute date from Swartkrans Cave for the oldest occurrences of *Paranthropus robustus* and Oldowan stone tools in South Africa. *Journal of Human Evolution*. 2021 Jul 1; 156:103000. <https://doi.org/10.1016/j.jhevol.2021.103000> PMID: 34020297
187. Makhubela TV, Winkler SR, Mbele V, Kramers JD, Khosa RR, Moabi HP, et al. Development of cosmogenic nuclide capabilities in South Africa and applications in Southern African geomorphology. *South African Geographical Journal = Suid-Afrikaanse Geografiese Tydskrif*. 2021 Jan 5; 103(1):99–118.
188. Pappu S, Gunnell Y, Akhilesh K, Braucher R, Taieb M, Demory F, et al. Early Pleistocene Presence of Acheulian Hominins in South India. *Science* [Internet]. 2011 Mar 25 [cited 2021 Dec 25]; Available from: <https://www.science.org/doi/abs/10.1126/science.1200183> PMID: 21436450
189. Braucher R, Merchel S, Borgomano J, Bourlès DL. Production of cosmogenic radionuclides at great depth: A multi element approach. *Earth and Planetary Science Letters*. 2011; 309(1–2):1–9.
190. Schurmans U, Bodu P. Fitting rocks: Lithic refitting examined. Vol. 1596. British Archaeological Reports Limited; 2007.
191. Inizan ML, Reduron M, Roche H, Tixier J. Technologie de la pierre taillée. C.R.E.P. Vol. Tome 4. Meudon; 1995. 199 p.
192. De Weyer L. An Early Stone Age in Western Africa? Spheroids and polyhedrons at Ounjougou, Mali. *Journal of Lithic Studies*. 2017; 4(1).
193. Texier PJ, Roche H. Polyèdre, sub-sphéroïde, sphéroïde et bola: des segments plus ou moins longs d'une même chaîne opératoire. *Cahier Noir*. 1995; 7:31–40.
194. Lourdeau A, Carbonera M, Hoeltz S, Santos MCP, de e Lucas, Costa AD, et al. Debitagem laminar no Sul do Brasil: Habemus nucleos! *Journal of Lithic Studies*. 2017 Nov 11; 4(3):127–43.
195. Bodu P. Paroles de pierre. Le concept de la chaîne opératoire appliqué aux industries lithiques paléolithiques. *Cahier des thèmes transversaux ArScAn*. 2001;86–90.
196. Forestier H. Le Clactonien: mise en application d'une nouvelle méthode de débitage s'inscrivant dans la variabilité des systèmes de production lithique du Paléolithique ancien. *Paléo*. 1993; 5(1):53–82.
197. Pelegrin J. Technologie lithique: le Châtelperronien de Roc-de-Combe (Lot) et de la Côte (Dordogne). CNRS; 1995.
198. Arroyo A, de la Torre I. Pounding tools in HWK EE and EF-HR (Olduvai Gorge, Tanzania): Percussive activities in the Oldowan-Acheulean transition. *Journal of Human Evolution* [Internet]. 2017 Nov 21

[cited 2018 Jul 5]; Available from: <http://www.sciencedirect.com/science/article/pii/S0047248417304347> PMID: 29169680

199. Caruana MV, Carvalho S, Braun DR, Presnyakova D, Haslam M, Archer W, et al. Quantifying traces of tool use: a novel morphometric analysis of damage patterns on percussive tools. *Plos One*. 2014; 9(11). <https://doi.org/10.1371/journal.pone.0113856> PMID: 25415303
200. Lotter MG. Final piece(s) of the puzzle: the remaining artefacts at Penhill Farm, South Africa, and their significance for understanding lithic production. *The South African Archaeological Bulletin*. In press;
201. Dauvois M. *Precis de Dessin Dynamique et Structural des Industries Lithiques Préhistoriques*. Fanlac, Périgueux, 263 p. *Dynamic and Structural Drawing precise of Prehistoric Lithic Industries*". 1976;
202. Turq A. Méthode de travail. *Paléo, Revue d'Archéologie Préhistorique*. 2000; 2(1):33–44.
203. Boëda E. *Techno-logique & Technologie. Une préhistoire des objets lithiques*. @rchéo-éditions. Paris; 2013. 264 p. (Préhistoire au Présent).
204. Capellari F, Grégoire S, de Lumley H. Lower Palaeolithic Core-Flake Industries in Western Europe: Techno-Functional Study of Layer «L» of Caune de l'Arago Cave (Tautavel, France). *J Paleo Arch*. 2021 Jun 19; 4(3):18.
205. Grimaldi S, Santaniello F, Angelucci DE, Bruni L, Parenti F. A Techno-Functional Interpretation of the Lithic Assemblage from Fontana Ranuccio (Anagni, Central Italy): an Insight into a MIS 11 Human Behaviour. *J Paleo Arch [Internet]*. 2020 Aug 28 [cited 2020 Aug 31]; Available from: <https://doi.org/10.1007/s41982-020-00064-3>
206. Marciani G, Arrighi S, Aureli D, Spagnolo V, Boscato P, Ronchitelli A. Middle Palaeolithic lithic tools: Techno-functional and use-wear analysis of target objects from SU 13 at the Oscurusciuto rock shelter, Southern Italy. *Journal of Lithic Studies [Internet]*. 2018 Dec 15 [cited 2020 Sep 24]; 5(2). Available from: <http://journals.ed.ac.uk/lithicstudies/article/view/2745>
207. Rocca R. Depuis l'Est? Nouvelles perspectives sur les premières dynamiques de peuplement en Europe. *L'anthropologie*. 2016; 120(3):209–36.
208. Zhou Y, Jiang Y, Liang G, Li Y, Forestier H, Li H, et al. A technological perspective on the lithic industry of the Bailiandong Cave (36–7 ka) in Guangxi: An effort to redefine the cobble-tool industry in South China. *Comptes Rendus Palevol*. 2019; 18(8):1095–121.
209. Weyer LD, Pérez A, Huguin R, Forestier H, Boëda E. Temps, mémoire et altérité en technologie lithique: synthèse et perspectives de l'approche technogénétique française. *Journal of Lithic Studies*. 2022 Apr 5; 9(1):48 p.-48 p.
210. Boëda E, Ramos M, Pérez A, Hatté C, Lahaye C, Pino M, et al. 24.0 kyr cal BP stone artefact from Vale da Pedra Furada, Piauí, Brazil: Techno-functional analysis. *PLOS ONE*. 2021 Mar 10; 16(3): e0247965.
211. Boëda E, Hou YM. Analyse des artefacts lithiques du site de Longgupo. *L'Anthropologie*. 2011 Jan 1; 115(1):78–175.
212. De Weyer L. *Les premières traditions techniques du Paléolithique ancien*. Eva David. L'Harmattan; 2020. (Cahiers d'Anthropologie des techniques).
213. Forestier H. *La pierre et son ombre. Epistémologie de la Préhistoire*. L'Harmattan. Paris, France; 2020. 274 p. (Cahiers d'Anthropologie des techniques).
214. Pérez-Balarezo A, Uceda S, Boëda E, Silva E, Carrión L, Romero R, et al. Cobbles, tools, and plants: Techno-functional variability within lithic industries of complex societies in Central Coast, Peru (~1800–400 BP). *Journal of Archaeological Science: Reports*. 2020 Dec 1; 34:102584.
215. Chevrier B. Les assemblages à pièces bifaciales au Pléistocène inférieur et moyen ancien en Afrique de l'Est et au Proche-Orient. Nouvelle approche du phénomène bifacial appliquée aux problématiques de migrations, de diffusion et d'évolution locale. *Bulletin de la Société préhistorique française*. 2013; 110(1):142–4.
216. Mesfin I, Oslisly R, Forestier H. Technological analysis of the quartz industry of Maboué 5 –Layer 3 (Lopé National Park, Gabon): Implications for the Late Stone Age emergence in western Central Africa. *Journal of Archaeological Science: Reports*. 2021 Oct 1; 39:103130.
217. Nicoud E. What does the Acheulean consist of? The example of Western Europe (MIS 16–9). *Mitteilungen der Gesellschaft für Urgeschichte*. 2013; 22:41–60.
218. Viallet C. Macrotraces of Middle Pleistocene bifaces from two Mediterranean sites: Structural and functional analysis. *Quaternary International*. 2016 Aug 8; 411:202–11.
219. Marshall G, Duplax D, Roe D, Gamble C. Lower Palaeolithic technology, raw material and population ecology (bifaces). 2002;

220. Mesfin I, Leplongeon A, Borel A, Pleurdeau D. Using morphometrics to reappraise old collections: the study case of Congo Basin Middle Stone Age bifacial industry. *Journal of Lithic Studies*. 2020;
221. Butzer KW. Re-evaluation of the geology of the Elandsfontein (Hopefield) site, south-western Cape, South Africa. *South African Journal of Science*. 1973; 69(8):234.
222. Klein RG, Avery G, Cruz-Urbe K, Steele TE. The mammalian fauna associated with an archaic hominin skullcap and later Acheulean artifacts at Elandsfontein, Western Cape Province, South Africa. *Journal of Human Evolution*. 2007 Feb 1; 52(2):164–86. <https://doi.org/10.1016/j.jhevol.2006.08.006> PMID: 17030056
223. Singer R, Wymer J. Archaeological investigations at the Saldanha skull site in South Africa. *The South African Archaeological Bulletin*. 1968; 23(91):63–74.
224. R Core Team. R: A Language and Environment for Statistical Computing, R Foundation for Statistical Computing, Vienna, Austria. <http://www.R-project.org>; 2018.
225. Hussain ST. The French-Anglophone divide in lithic research: A plea for pluralism in Palaeolithic Archaeology [PhD Thesis]. 2019.
226. Gatehouse RP. The Prehistoric Site at Cape Hangklip. *Transactions of the Royal Society of South Africa*. 1954 Jan 1; 34(2):335–44.
227. Mabbutt JA. Cape Hangklip—a Study in Coastal Geomorphology. *Transactions of the Royal Society of South Africa*. 1954 Jan 1; 34(1):17–24.
228. Tostevin GB. Seeing lithics: a middle-range theory for testing for cultural transmission in the Pleistocene. *American School of Prehistoric Research Monograph Series, Peabody Museum . . .*; 2012.
229. Klein RG. The archaeological significance of animal bones from Acheulean sites in southern Africa. *Afr Archaeol Rev*. 1988 Dec 1; 6(1):3–25.
230. Shackley M. An Acheulean industry with *Elephas recki* fauna from Namib IV, South West Africa (Namibia). *Nature*. 1980; 284(5754):340–1.
231. Shackley M, Komura K, Hayashi T, Motoji I, Matsu'ura S, Ueta N. Chronometric dating of bone from Namib IV Acheulean Site, South West Africa/Namibia. *Bulletin National of Science*. 1985; 11:7–12.
232. Corvinus G. An Acheulean industry within raised beach complex of the CDM concession area, S.W. Africa (Namibia). *Quartär*. 1985;183–9.
233. Spaggiari RI, Bluck BJ, Ward JD. Characteristics of diamondiferous Plio-Pleistocene littoral deposits within the palaeo-Orange River mouth, Namibia. *Ore Geology Reviews*. 2006 May 1; 28(4):475–92.
234. Erlanger ED, Granger DE, Gibbon RJ. Rock uplift rates in South Africa from isochron burial dating of fluvial and marine terraces. *Geology*. 2012; 40(11):1019–22.
235. Granger DE, Gibbon RJ, Kuman K, Lotter MG, Erlanger E. Isochron burial dating method and application to an Earlier Stone Age chronosequence on the Sundays River, South Africa. In: Poster presented at the Association of Southern African Professional Archaeologists Biennial Conference, Gaborone, Botswana. 2013.
236. Lotter MG. An introduction to the formal tools from the Acheulean site of Penhill Farm, Lower Sundays River Valley, South Africa. *The South African Archaeological Bulletin*. 2020;
237. Lombera AH. Quartz morphostructural groups and their mechanical implications. *Sezione di Museologia Scientifica e Naturalistica*. 2008; 3(0):1–5.
238. Pargeter J, Hampson J. Quartz crystal materiality in Terminal Pleistocene Lesotho. *Antiquity*. 2019 Feb; 93(367):11–27.
239. Spry C, Kurpiel R, Foley E, Penzo-Kajewski P. Revisiting the “Quartz Problem” in Lithic Studies: A Review and New, Open-access, Experimental Dataset. *Lithic Technology*. 2021 Sep 27; 0(0):1–11.
240. Sharon G. Large flake Acheulean. *Quaternary International*. 2010; 223:226–33.
241. Soriano S, Robert A, Huysecom E. Percussion bipolaire sur enclume: choix ou contrainte? L'exemple du Paléolithique d'Ounjougou (Pays dogon, Mali). *PALEO Revue d'archéologie préhistorique*. 2010; (spécial):123–32.
242. Boëda E. Le débitage discoïde et le débitage Levallois récurrent centripède. *Bulletin de la Société préhistorique française*. 1993; 90(6):392–404.
243. Mourre V. Discoïde ou pas discoïde? Réflexions sur la pertinence des critères techniques définissant le débitage discoïde. *BAR International Series*. 2003;1120:1–18.
244. Mesfin I, Gutierrez M, Pleurdeau D, Forestier H, Benjamim MH. Raw material procurement and management in an Acheulean coastal context: the case of Dungo IV (Benguela Province, Angola). Oral communication presented at: ASAPA; 2019 Jul; Kimberley.



245. Wilkins J, Pollarolo L, Kuman K. Prepared core reduction at the site of Kudu Koppie in northern South Africa: temporal patterns across the Earlier and Middle Stone Age boundary. *Journal of Archaeological Science*. 2010; 37(6):1279–92.
246. Toth N. The oldowan reassessed: A close look at early stone artifacts. *Journal of Archaeological Science*. 1985 Mar 1; 12(2):101–20.
247. Wentworth CK. A scale of grade and class terms for clastic sediments. *The Journal of Geology*. 1922; 30(5):377–92.
248. Chazan M. Technological Trends in the Acheulean of Wonderwerk Cave, South Africa. *Afr Archaeol Rev*. 2015 Dec 1; 32(4):701–28.
249. Mesfin I, Pleurdeau D, Forestier H. L'assemblage lithique du site Acheuléen de Namib IV (Namib central, Namibie). *L'Anthropologie*. 2021 Jan 1; 125(1):102848.
250. Cabanès J, Borel A, Preysler JB, Lourdeau A, Moncel MH. Palaeolithic polyhedrons, spheroids and bolas over time and space. *PLOS ONE*. 2022 Jul 28; 17(7):e0272135. <https://doi.org/10.1371/journal.pone.0272135> PMID: 35901051
251. Archer W, Braun DR. Variability in bifacial technology at Elandsfontein, Western cape, South Africa: a geometric morphometric approach. *Journal of Archaeological Science*. 2010 Jan 1; 37(1):201–9.
252. Ioviță R, McPherron SP. The handaxe reloaded: A morphometric reassessment of Acheulian and Middle Paleolithic handaxes. *Journal of Human Evolution*. 2011 Jul 1; 61(1):61–74. <https://doi.org/10.1016/j.jhevol.2011.02.007> PMID: 21496877
253. Li H, Kuman K, Li C. Quantifying the Reduction Intensity of Handaxes with 3D Technology: A Pilot Study on Handaxes in the Danjiangkou Reservoir Region, Central China. *PLOS ONE*. 2015 Sep 2; 10(9):e0135613. <https://doi.org/10.1371/journal.pone.0135613> PMID: 26331954
254. McNabb J, Binyon F, Hazelwood L. The Large Cutting Tools from the South African Acheulean and the Question of Social Traditions. *Current Anthropology*. 2004; 45(5):653–77.
255. Serwatka K. Shape variation of Middle Palaeolithic bifacial tools from southern Poland: a geometric morphometric approach to Keilmessergruppen handaxes and backed knives. *Lithics—The Journal of the Lithic Studies Society*. 2015 Dec 21; 0(35):18.
256. Lotter MG, Caruana MV. Exploring core reduction preferences at Penhill Farm, Lower Sundays River Valley. *The South African Archaeological Bulletin*. 2021; 76(214).
257. Gonçalves dos Santos V. Morfologia descritiva de choppers, chopping-tools e seixos afeiçoados da Ponta Negra (Moçâmedes—Angola). *O Arqueólogo Português*. 1971;(3):7–17.
258. Clark JD. Prehistoric cultures of northeast Angola and their significance in tropical Africa. *Museu do Dundo*; 1963. 222 p.
259. Janmart J. Stations préhistoriques de l'Angola du Nord Est—analyse géologique, climatologique et pré-historique d'un sondage fait en bordure de la rivière Luembe (Angola du Nord Est). *Subsidios para a historia, arqueologia e etnografia dos povos da Lunda ...*; 1947.
260. Janmart J. Les stations paléolithiques de l'Angola Nord-Est. *Comp. de Diamantes de Angola*; 1946.
261. Ramos M. As escavações de Capangombe eo problema da MSA no SW de Angola. *LEBA: estudos de pré-história e arqueologia*. 1981;(4):29–35.
262. Ramos M. Le gisement acheuléen de Capangombe, St. Antonio (Angola). *Leba Estudos de Pré-história e Arqueologia Lisboa*. 1980;(3):15–21.
263. Corvinus G. Paleontological and archaeological investigations of the Lower Orange River Valley from Arrisdrift to Obib. *Palaeoecology of Africa*. 1978; 10(11):75–91.
264. Hallinan E, Parkington J. Stone Age landscape use in the Olifants River Valley, Clanwilliam, Western Cape, South Africa. *Azania: Archaeological Research in Africa*. 2017; 52(3):324–72.
265. Cambray JA, Davies BR, Ashton PJ, Agnew JD, De Moor FC, Skelton PH. The Orange-Vaal River system. In: Davies BR, Walker KF, editors. *The Ecology of River Systems* [Internet]. Dordrecht: Springer Netherlands; 1986 [cited 2019 Sep 16]. p. 89–161. (Monographiae Biologicae). [https://doi.org/10.1007/978-94-017-3290-1\\_4](https://doi.org/10.1007/978-94-017-3290-1_4)
266. Meissner R. The Orange-Senqu River. In: Meissner R, editor. *Interest Groups, Water Politics and Governance: The Case of the Lesotho Highlands Water Project* [Internet]. Cham: Springer International Publishing; 2015 [cited 2022 Aug 21]. p. 21–64. (SpringerBriefs in Environmental Science). [https://doi.org/10.1007/978-3-319-21130-5\\_3](https://doi.org/10.1007/978-3-319-21130-5_3)
267. Lotter MG. The archaeology of the lower Sundays River Valley, Eastern Cape Province, South Africa: an assessment of Earlier Stone Age alluvial terrace sites [PhD Thesis]. [Johannesburg]: University of Witwatersrand; 2016.

268. Lotter MG, Kuman K. The Acheulean in South Africa, with announcement of a new site (Penhill Farm) in the lower Sundays River Valley, Eastern Cape Province, South Africa. *Quaternary International*. 2018; 480:43–65.
269. Sharon G. Acheulian Giant-Core Technology: A Worldwide Perspective. *Current Anthropology*. 2009 Jun; 50(3):335–67.
270. Hublin JJ, Ben-Ncer A, Bailey SE, Freidline SE, Neubauer S, Skinner MM, et al. New fossils from Jebel Irhoud, Morocco and the pan-African origin of *Homo sapiens*. *Nature*. 2017; 546(7657):289–92. <https://doi.org/10.1038/nature22336> PMID: 28593953
271. Vidal CM, Lane CS, Asrat A, Barfod DN, Mark DF, Tomlinson EL, et al. Age of the oldest known *Homo sapiens* from eastern Africa. *Nature*. 2022 Jan; 601(7894):579–83. <https://doi.org/10.1038/s41586-021-04275-8> PMID: 35022610
272. Daujeard C, Falguères C, Shao Q, Geraads D, Hublin JJ, Lefevre D, et al. Earliest African evidence of carcass processing and consumption in cave at 700 ka, Casablanca, Morocco. *Scientific reports*. 2020; 10(1):1–15.
273. Gallotti R, Muttoni G, Lefèvre D, Degeai JP, Geraads D, Zerboni A, et al. First high resolution chronostratigraphy for the early North African Acheulean at Casablanca (Morocco). *Sci Rep*. 2021 Jul 28; 11(1):15340. <https://doi.org/10.1038/s41598-021-94695-3> PMID: 34321552
274. Raynal JP, Lefèvre D, El Graoui M, Rué M. La grotte des rhinocéros (Casablanca, Maroc): le remplissage et son âge. In: *La Grotte des Rhinocéros (Casablanca, Maroc), site du second Acheuléen du Maghreb (fouilles 1991 et 1996)* [Internet]. Ministère de la Culture; 2016 [cited 2020 Apr 27]. p. p.-79-86. (Villes et Sites Archéologiques du Maroc; vol. VI). <https://halshs.archives-ouvertes.fr/halshs-02155022>
275. Raynal JP, Alaoui FZS, Magoga L, Mohib A, Zouak M. The Lower Palaeolithic Sequence of Atlantic Morocco Revisited After Recent Excavations at Casablanca. *Bulletin d'Archéologie marocaine*. 2004; XX:44–76.
276. Sharon G. Flakes crossing the straits? Entame flakes and northern Africa–Iberia contact during the Acheulean. *African Archaeological Review*. 2011; 28(2):125–40.
277. Russon AE, Compost A, Kuncoro P, Ferisa A. Orangutan fish eating, primate aquatic fauna eating, and their implications for the origins of ancestral hominin fish eating. *Journal of Human Evolution*. 2014 Dec 1; 77:50–63. <https://doi.org/10.1016/j.jhevol.2014.06.007> PMID: 25038033
278. Haslam M, Gumert MD, Biro D, Carvalho S, Malaivijitnond S. Use-Wear Patterns on Wild Macaque Stone Tools Reveal Their Behavioural History. *PLOS ONE*. 2013 Aug 16; 8(8):e72872. <https://doi.org/10.1371/journal.pone.0072872> PMID: 23977365
279. Lewis MC, West AG, O'Riain MJ. Isotopic assessment of marine food consumption by natural-foraging chacma baboons on the Cape Peninsula, South Africa. *American Journal of Physical Anthropology*. 2018; 165(1):77–93. <https://doi.org/10.1002/ajpa.23332> PMID: 29076130
280. Cortés-Sánchez M, Morales-Muñiz A, Simón-Vallejo MD, Lozano-Francisco MC, Vera-Peláez JL, Finlayson C, et al. Earliest Known Use of Marine Resources by Neanderthals. *PLOS ONE*. 2011 Sep 14; 6(9):e24026. <https://doi.org/10.1371/journal.pone.0024026> PMID: 21935371
281. Villa P, Soriano S, Pollarolo L, Smriglio C, Gaeta M, D'Orazio M, et al. Neandertals on the beach: Use of marine resources at Grotta dei Moscerini (Latium, Italy). *PLoS One*. 2020 Jan 15; 15(1):e0226690. <https://doi.org/10.1371/journal.pone.0226690> PMID: 31940356
282. Zilhão J, Angelucci DE, Igreja MA, Arnold LJ, Badal E, Callapez P, et al. Last Interglacial Iberian Neandertals as fisher-hunter-gatherers. *Science*. 2020 Mar 27; 367(6485):eaaz7943. <https://doi.org/10.1126/science.aaz7943> PMID: 32217702
283. Monnier JL, Ravon AL, Hinguant S, Hallégouët B, Gaillard C, Laforge M. Menez-Dregan 1 (Plouhinec, Finistère, France): un site d'habitat du Paléolithique inférieur en grotte marine. Stratigraphie, structures de combustion, industries riches en galets aménagés. *L'Anthropologie*. 2016 Jun 1; 120(3):237–62.
284. Monnier JL, Molines N. Le «colombanien»: un faciès régional du paléolithique inférieur sur le littoral armoricain-atlantique. *Bulletin de la Société préhistorique française*. 1993; 90(4):283–94.
285. Ravon AL, Gaillard C, Monnier JL. Menez-Dregan (Plouhinec, far western Europe): The lithic industry from layer 7 and its Acheulean components. *Quaternary International*. 2016 Aug 8; 411:132–43.
286. Gallotti R, Mussi M. Two Acheuleans, two humankind: From 1.5 to 0.85 Ma at Melka Kunture (Upper Awash, Ethiopian highlands). *J Anthropol Sci*. 2017 Dec 30; 95:137–81. <https://doi.org/10.4436/JASS.95001> PMID: 27983519
287. Andah BW. The Early Palaeolithic in West Africa: The Case of Asokrochona Coastal Region of Accra, Ghana in Perspectives on West Africa's Past. *West Afr j archaeol*. 1979; 9:47–85.
288. Davies O. The archaeology of the flooded Volta Basin. Department of Archaeology, University of Ghana; 1971.
